# Supplementary material for: Microwave-assisted rapid synthesis of chiral oxazolines
Source: Royal Society of Chemistry journal article supplement (doi:10.1039/d2ob02192g), 2023-01-01
Supplement: d2ob02192g1.pdf [file d2ob02192g1.pdf]

## Supporting Information

# Microwave-assisted Rapid Synthesis of Chiral Oxazolines

Haowen Deng<sup>a, b, c, d</sup>, Jianshe Wang<sup>e</sup>, Wei He<sup>f</sup>, Yang Ye<sup>a, b, c, d</sup>, Renren Bai<sup>a, b, c, d</sup>, Xuelei Zhang<sup>a, b, c, d</sup>, Xiang-  
Yang Ye<sup>a, b, c, d, \*</sup>, Tian Xie<sup>a, b, c, d, \*</sup> and Zi Hui<sup>a, b, c, d, \*</sup>

<sup>a</sup>School of Pharmacy, Hangzhou Normal University, Hangzhou, Zhejiang 311121, China

<sup>b</sup>Key Laboratory of Elemene Class Anti-Cancer Chinese Medicine of Zhejiang Province, China

<sup>c</sup>Engineering Laboratory of Development and Application of Traditional Chinese Medicine from Zhejiang  
Province, China

<sup>d</sup>Collaborative Innovation Center of Chinese Medicines from Zhejiang Province, China

<sup>e</sup>Drug Discovery, Hangzhou PurpleCrystal Pharma Co. Ltd., Hangzhou, Zhejiang 311121, China

<sup>f</sup>Chemical Manufacturing and Control, Adlai Nortye Ltd., Hangzhou, Zhejiang 311121, China

## Table of Contents

|                                                                     |          |
|---------------------------------------------------------------------|----------|
| I. Experimental Section .....                                       | S2-S20   |
| Part 1. General Information .....                                   | S2       |
| Part 2. Microwave Irradiation Experiment and General Procedure..... | S3-S4    |
| Part 3. Characterization Data of All Compounds .....                | S4-S22   |
| II. Spectral Data for New Compounds .....                           | S23-S115 |
| III. References .....                                               | S116     |

## **I. Experimental Section**

### ***Part 1. General Information***

All operations were carried out at room temperature and atmospheric environment. Chlorobenzene was purchased (Energy Chemical, China) and used directly. Deuterated solvents were used as received ( $\text{CDCl}_3$ ,  $\text{C}_2\text{D}_6\text{SO}$  from Energy Chemical, China).  $\text{ZnCl}_2$  (Sinopharm Group Co., China),  $\text{CoCl}_2$  (Energy Chemical, China),  $\text{CoBr}_2$  (Energy Chemical, China),  $\text{CoI}_2$  (Energy Chemical, China) were purchased and used as received. Unless otherwise noted, all other reagents and starting materials were purchased in the analytical purity from commercial sources and used without further purification.

Column chromatography was performed using silica gel 300-400 mesh (purchased from Liangchen Silicon Material CO., Ltd. China) as the solid support. All NMR spectra were recorded on Bruker Avance 500 MHz spectrometer at STP unless otherwise indicated.  $^1\text{H}$  NMR and  $^{13}\text{C}$  NMR chemical shifts are reported in  $\delta$  units, parts per million (ppm) relative to the chemical shift of residual solvent. Reference peaks for chloroform in  $^1\text{H}$  NMR and  $^{13}\text{C}$  NMR spectra were set at 7.26 ppm and 77.16 ppm, respectively. High resolution mass spectra were measured on Bruker MicroTOF II ESI-TOF mass spectrometer. Low resolution mass spectra were measured on Agilent 1260 Infinity II/6125 mass spectrometer. Melting point was recorded on a micro melting point apparatus (X-4, Yuhua Co., Ltd, Gongyi, China).

## ***Part 2. Microwave irradiation experiment and general procedure***

### **1. Microwave Irradiation Experiment:**

All microwave irradiation reactions were carried out in a Biotage<sup>®</sup> Initiator+ microwave reactor, operating with continuous irradiation power from 0 to 400 W and heating up to 300°C with a cut-off of 30 bar pressure. The microwave reactor was used in the standard configuration as delivered. All reactions were carried out in a Biotage<sup>®</sup> microwave vial (2-5 mL) and sealed with an aluminum/Teflon<sup>®</sup> crimp top, which enable to bear maximum internal pressure of 30 bar. The built-in IR sensor of the instrument measures the temperature at all time. After the irradiation period, the reaction vial was cooled down to the ambient temperature by the built-in gas jet cooling before the safety cap was removed<sup>1</sup>.

### **2. General Procedure**

**General procedure for the reaction of nitrile with  $\beta$ -amino alcohol (Method A):** To a flame-dried 2-5 mL microwave vial equipped with a magnetic stir-bar was added with  $\beta$ -amino alcohol (1 mmol, 100 mol %), CoBr<sub>2</sub> (21.9 mg, 0.1 mmol, 10 mol %), 4A Molecular Sieve (MS, 20% w/w), and nitrile (1 mmol, 100 mol %). Slowly add 2 ml of chlorobenzene along the bottle wall with a dropper. The vial was tightly sealed with aluminum/Teflon<sup>®</sup> crimp top and was exposed to microwave irradiation at a constant temperature of 200 °C for 30 minutes. After completion of the reaction (until no change in pressure was observed), the reaction mixture was cooled to ambient temperature. Subsequently, the reaction mixture was filtered with a Buchner funnel and rinsed three times with a minimum amount of dichloromethane. The solid was recovered after drying in oven. The collected liquid was concentrated in vacuum and then purified by rapid column chromatography.

**General procedure for the reaction of nitrile with  $\beta$ -amino alcohol (Method B):** To a flame-dried 2-5 mL microwave vial equipped with a magnetic stir-bar was charged with  $\beta$ -amino alcohol (1 mmol, 100 mol %), CoBr<sub>2</sub> (21.9 mg, 0.1 mmol, 10 mol %), 4A MS (20% w/w), nitrile (1 mmol, 100 mol %). The vial was tightly sealed with aluminum/Teflon<sup>®</sup> crimp top and was exposed to microwave irradiation at a constant temperature of 200 °C for 30 minutes. After completion of the reaction (until no change in pressure was observed), the reaction mixture was cooled to ambient temperature. Subsequently, the reaction mixture was filtered with a Buchner funnel and rinsed three

times with a minimum amount of dichloromethane. The solid was recovered after drying in oven. The collected liquid was concentrated in vacuum and then purified by rapid column chromatography.

**CAUTION: When method B was used for experimental operation, since there is no solvent, the reactants should be added to the bottom of the microwave vial as smoothly as possible, so as to avoid local overheating caused by the solid adhering to the vial wall, thus causing explosion.**

### ***Part 3. Characterization Data of All Compounds***

#### **(3a*S*,8a*R*)-2-phenyl-3a,8a-dihydro-8*H*-indeno[1,2-*d*]oxazole (3).**

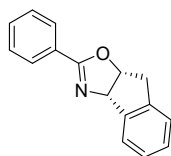

The title compound was prepared according to the general procedure. After purification in a flash column chromatography (SiO<sub>2</sub>: 5% ethyl acetate in petroleum ether), the title compound was isolated as a white solid. Method A:

188.2 mg (0.80 mmol, 80% yield); Method B: 178.8 mg (0.76 mmol, 76% yield).

**<sup>1</sup>H NMR** (500 MHz, CDCl<sub>3</sub>):  $\delta$  8.01–7.86 (m, 2H), 7.61–7.53 (m, 1H), 7.47–7.41 (m, 1H), 7.40–7.32 (m, 2H), 7.28–7.26 (m, 3H), 5.75 (d,  $J$  = 7.9 Hz, 1H), 5.50 (ddd,  $J$  = 8.1, 6.9, 1.7 Hz, 1H), 3.51 (dd,  $J$  = 17.9, 6.9 Hz, 1H), 3.37 (dd,  $J$  = 17.9, 1.7 Hz, 1H).

**<sup>13</sup>C NMR** (126 MHz, CDCl<sub>3</sub>):  $\delta$  158.7, 136.7, 134.5, 126.0, 123.2, 123.1, 123.0, 122.6, 122.2, 120.4, 120.0, 77.9, 71.7, 34.6.

**HRMS** (ESI)  $m/z$  ([M+H]<sup>+</sup>) calcd for C<sub>16</sub>H<sub>14</sub>NO: 236.1070. Found: 236.1098.

**M.p.:** 142.6–143.6 °C.

#### **(3a*S*,8a*R*)-2-(3-methoxyphenyl)-3a,8a-dihydro-8*H*-indeno[1,2-*d*]oxazole (4)**

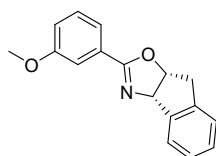

The title compound was prepared according to the general procedure using (1*S*,2*R*)-1-amino-2,3-dihydro-1*H*-inden-2-ol (298.4 mg, 2 mmol, 200 mol %) as the starting amino alcohol. After purification by a flash column

chromatography (SiO<sub>2</sub>: 5% ethyl acetate in petroleum ether), the title compound (209.5 mg, 0.79 mmol, 79% yield) was isolated as a black solid.

**<sup>1</sup>H NMR** (500 MHz, CDCl<sub>3</sub>): δ 7.60–7.56 (m, 1H), 7.52 (dt, *J* = 7.6, 1.3 Hz, 1H), 7.47 (dd, *J* = 2.8, 1.4 Hz, 1H), 7.30–7.26 (m, 4H), 6.99 (ddd, *J* = 8.3, 2.7, 1.0 Hz, 1H), 5.74 (d, *J* = 7.8 Hz, 1H), 5.49 (ddd, *J* = 8.2, 6.9, 1.7 Hz, 1H), 3.82 (s, 3H), 3.54–3.35 (m, 2H).

**<sup>13</sup>C NMR** (126 MHz, CDCl<sub>3</sub>): δ 163.9, 159.3, 141.9, 139.7, 129.2, 129.1, 128.4, 127.4, 125.6, 125.2, 120.8, 118.0, 112.6, 83.1, 76.9, 55.4, 39.8.

**HRMS** (ESI) *m/z* ([*M*+*H*]<sup>+</sup>) calcd for C<sub>17</sub>H<sub>16</sub>NO<sub>2</sub>: 266.1176. Found: 266.1176.

**M.p.**: 104 °C.

**(3*aS*,8*aR*)-2-(3-fluorophenyl)-3*a*,8*a*-dihydro-8*H*-indeno[1,2-*d*]oxazole (5)**

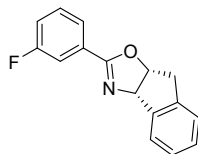

The title compound was prepared according to the general procedure. After purification by a flash column chromatography (SiO<sub>2</sub>: 5% ethyl acetate in petroleum ether), the title compound was isolated as a white solid. Method A:

215.3 mg (0.85 mmol, 85% yield); Method B: 202.6 mg (0.80 mmol, 80% yield).

**<sup>1</sup>H NMR** (500 MHz, CDCl<sub>3</sub>): δ 7.72 (dt, *J* = 7.7, 1.3 Hz, 1H), 7.63 (ddd, *J* = 9.6, 2.7, 1.5 Hz, 1H), 7.59–7.54 (m, 1H), 7.34 (td, *J* = 8.0, 5.7 Hz, 1H), 7.31–7.26 (m, 3H), 7.13 (tdd, *J* = 8.3, 2.6, 0.9 Hz, 1H), 5.75 (d, *J* = 7.9 Hz, 1H), 5.49 (ddd, *J* = 8.1, 6.9, 1.7 Hz, 1H), 3.54–3.34 (m, 2H).

**<sup>13</sup>C NMR** (126 MHz, CDCl<sub>3</sub>): δ 163.5–162.7 (m), 161.4, 141.7, 139.6, 129.8 (d, *J* = 7.9 Hz), 128.5, 127.5, 125.6, 125.3, 124.0 (d, *J* = 3.1 Hz), 118.2 (d, *J* = 21.1 Hz), 115.3 (d, *J* = 23.4 Hz), 83.4, 77.0, 39.7.

**HRMS** (ESI) *m/z* ([*M*+*H*]<sup>+</sup>) calcd for C<sub>16</sub>H<sub>13</sub>FNO: 254.0976. Found: 254.0975.

**M.p.**: 162 °C.

**(3*aS*,8*aR*)-2-(2-fluorophenyl)-3*a*,8*a*-dihydro-8*H*-indeno[1,2-*d*]oxazole (6)**

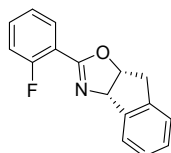

The title compound was prepared according to the general procedure A. After purification by a flash column chromatography (SiO<sub>2</sub>: 5% ethyl acetate in petroleum ether), the title compound (129.2 mg, 0.51 mmol, 51% yield) was

isolated as a white solid.

**<sup>1</sup>H NMR** (500 MHz, CDCl<sub>3</sub>): δ 7.85 (td, *J* = 7.5, 1.9 Hz, 1H), 7.64–7.55 (m, 1H), 7.45–7.36 (m, 1H), 7.31–7.26 (m, 3H), 7.18–7.04 (m, 2H), 5.78 (d, *J* = 7.9 Hz, 1H), 5.48 (ddd, *J* = 8.2, 6.8, 1.8 Hz, 1H), 3.56–3.31 (m, 2H).

**<sup>13</sup>C NMR** (126 MHz, CDCl<sub>3</sub>): δ 162.3, 160.9–159.6 (m), 141.7, 139.7, 132.8 (d, *J* = 8.7 Hz), 131.2 (d, *J* = 1.9 Hz), 128.5, 127.5, 125.7, 125.3, 123.8 (d, *J* = 3.8 Hz), 116.6 (d, *J* = 22.1 Hz), 116.1 (d, *J* = 10.6 Hz), 82.9, 77.0, 39.8.

**HRMS** (ESI) *m/z* ([*M*+*H*]<sup>+</sup>) calcd for C<sub>16</sub>H<sub>13</sub>FNO: 254.0976. Found: 254.0977.

**M.p.:** 99.5 °C.

**(3*aS*,8*aR*)-2-(4-fluorophenyl)-3*a*,8*a*-dihydro-8*H*-indeno[1,2-*d*]oxazole (7)**

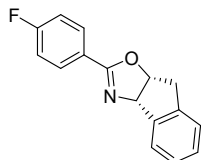

The title compound was prepared according to the general procedure. After purification by a flash column chromatography (SiO<sub>2</sub>: 5% ethyl acetate in petroleum ether), the title compound was isolated as a white solid. Method A:

164.6 mg (0.65 mmol, 65% yield); Method B: 146.9 mg (0.58 mmol, 58% yield).

**<sup>1</sup>H NMR** (500 MHz, CDCl<sub>3</sub>): δ 7.93 (dd, *J* = 8.8, 5.5 Hz, 2H), 7.60–7.53 (m, 1H), 7.31–7.26 (m, 3H), 7.05 (t, *J* = 8.7 Hz, 2H), 5.73 (d, *J* = 7.8 Hz, 1H), 5.48 (ddd, *J* = 8.2, 6.9, 1.7 Hz, 1H), 3.54–3.33 (m, 2H).

**<sup>13</sup>C NMR** (126 MHz, CDCl<sub>3</sub>): δ 165.9, 163.2 (d, *J* = 27.7 Hz), 141.9, 139.7, 130.6 (d, *J* = 8.8 Hz), 128.5, 127.5, 125.6, 125.3, 124.1 (d, *J* = 3.1 Hz), 115.4, 115.2, 83.3, 77.0, 39.8.

**HRMS** (ESI) *m/z* ([*M*+*H*]<sup>+</sup>) calcd for C<sub>16</sub>H<sub>13</sub>FNO: 254.0976. Found: 254.0974.

**M.p.:** 181.5–182 °C.

**(3*aS*,8*aR*)-2-(3-chlorophenyl)-3*a*,8*a*-dihydro-8*H*-indeno[1,2-*d*]oxazole (8)**

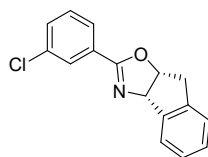

The title compound was prepared according to the general procedure. After purification by a flash column chromatography (SiO<sub>2</sub>: 5% ethyl acetate in petroleum ether), the title compound was isolated as a white solid. Method A:

191.5 mg (0.71 mmol, 71% yield); Method B: 188.8 mg (0.70 mmol, 70% yield).

**<sup>1</sup>H NMR** (500 MHz, CDCl<sub>3</sub>): δ 7.93 (t, *J* = 1.9 Hz, 1H), 7.81 (dt, *J* = 7.8, 1.3 Hz, 1H), 7.61–7.53 (m, 1H), 7.40 (ddd, *J* = 8.0, 2.2, 1.1 Hz, 1H), 7.32–7.26 (m, 4H), 5.74 (dd, *J* = 7.9, 0.8 Hz, 1H), 5.49 (ddd, *J* = 8.3, 6.9, 1.7 Hz, 1H), 3.56–3.30 (m, 2H).

**<sup>13</sup>C NMR** (126 MHz, CDCl<sub>3</sub>): δ 162.8, 141.7, 139.6, 134.2, 131.2, 129.6, 129.5, 128.5, 128.4, 127.5, 126.4, 125.5, 125.3, 83.4, 77.0, 39.7.

**HRMS** (ESI) *m/z* ([*M*+*H*]<sup>+</sup>) calcd for C<sub>16</sub>H<sub>13</sub>ClNO: 270.0680. Found: 270.0675.

**M.p.:** 180.5–181.5 °C.

**(3*aS*,8*aR*)-2-(4-chlorophenyl)-3*a*,8*a*-dihydro-8*H*-indeno[1,2-*d*]oxazole (9)**

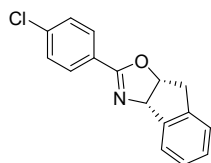

The title compound was prepared according to the general procedure. After purification by a flash column chromatography (SiO<sub>2</sub>: 5% ethyl acetate in petroleum ether), the title compound was isolated as a white solid. Method A:

215.8 mg (0.80 mmol, 80% yield); Method B: 207.7 mg (0.77 mmol, 77% yield).

**<sup>1</sup>H NMR** (500 MHz, CDCl<sub>3</sub>):  $\delta$  7.90–7.81 (m, 2H), 7.58–7.52 (m, 1H), 7.36–7.32 (m, 2H), 7.30–7.26 (m, 3H), 5.73 (dd,  $J$  = 7.9, 0.8 Hz, 1H), 5.48 (ddd,  $J$  = 7.9, 6.9, 1.7 Hz, 1H), 3.53–3.33 (m, 2H).

**<sup>13</sup>C NMR** (126 MHz, CDCl<sub>3</sub>):  $\delta$  163.1, 141.8, 139.6, 137.4, 129.7, 128.6, 128.5, 127.5, 126.4, 125.6, 125.3, 83.4, 77.0, 39.8.

**HRMS** (ESI)  $m/z$  ([M+H]<sup>+</sup>) calcd for C<sub>16</sub>H<sub>13</sub>ClNO: 270.0680. Found: 270.0673.

**M.p.:** 230.5 °C.

#### (3a*S*,8a*R*)-2-(3-(trifluoromethyl)phenyl)-3a,8a-dihydro-8*H*-indeno[1,2-*d*]oxazole (10)

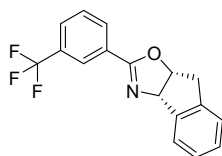

The title compound was prepared according to the general procedure. After purification by a flash column chromatography (SiO<sub>2</sub>: 5% ethyl acetate in petroleum ether), the title compound was isolated as a white solid. Method A:

248.7 mg (0.82 mmol, 82% yield); Method B: 242.6 mg (0.80 mmol, 80% yield).

**<sup>1</sup>H NMR** (500 MHz, CDCl<sub>3</sub>):  $\delta$  8.21 (d,  $J$  = 1.7 Hz, 1H), 8.12 (dd,  $J$  = 7.9, 1.4 Hz, 1H), 7.69 (ddt,  $J$  = 7.9, 1.8, 0.9 Hz, 1H), 7.61–7.55 (m, 1H), 7.50 (t,  $J$  = 7.8 Hz, 1H), 7.32–7.27 (m, 3H), 5.77 (dd,  $J$  = 7.9, 0.8 Hz, 1H), 5.52 (ddd,  $J$  = 8.1, 6.9, 1.7 Hz, 1H), 3.56–3.37 (m, 2H).

**<sup>13</sup>C NMR** (126 MHz, CDCl<sub>3</sub>):  $\delta$  162.7, 141.6, 139.6, 131.5, 130.9, 130.7, 128.7 (d,  $J$  = 4.3 Hz), 128.6, 127.7 (q,  $J$  = 3.7 Hz), 127.5, 125.6, 125.3 (q,  $J$  = 5.6 Hz), 124.8, 122.6, 83.6, 77.1, 39.7.

**HRMS** (ESI)  $m/z$  ([M+H]<sup>+</sup>) calcd for C<sub>17</sub>H<sub>13</sub>F<sub>3</sub>NO: 304.0944. Found: 304.0949.

**M.p.:** 172.5 °C.

#### (3a*S*,8a*R*)-2-(4-(trifluoromethyl)phenyl)-3a,8a-dihydro-8*H*-indeno[1,2-*d*]oxazole (11)

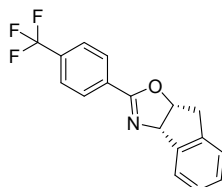

The title compound was prepared according to the general procedure A. After purification by a flash column chromatography (SiO<sub>2</sub>: 5% ethyl acetate in petroleum ether), the title compound (94.1 mg, 0.31 mmol, 31% yield) was isolated as a white solid.

**<sup>1</sup>H NMR** (500 MHz, CDCl<sub>3</sub>):  $\delta$  8.07–8.02 (m, 2H), 7.65–7.55 (m, 3H), 7.28 (d,  $J$  = 2.3 Hz, 3H), 5.77 (d,  $J$  = 7.9 Hz, 1H), 5.52 (ddd,  $J$  = 8.2, 6.9, 1.7 Hz, 1H), 3.56–3.35 (m, 2H).

**<sup>13</sup>C NMR** (126 MHz, CDCl<sub>3</sub>): δ 162.8, 141.6, 139.6, 133.0, 132.7, 131.2, 128.7 (d, *J* = 6.0 Hz), 127.6, 125.6, 125.3, 125.2 (q, *J* = 3.9 Hz), 122.4, 83.6, 77.1, 39.8.

**HRMS** (ESI) *m/z* ([*M*+*H*]<sup>+</sup>) calcd for C<sub>17</sub>H<sub>13</sub>F<sub>3</sub>NO: 304.0944. Found: 304.0938.

**M.p.:** 188.5 °C.

**(3*aS*,8*aR*)-2-(3-bromophenyl)-3*a*,8*a*-dihydro-8*H*-indeno[1,2-*d*]oxazole (12)**

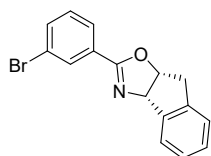

The title compound was prepared according to the general procedure. After purification by a flash column chromatography (SiO<sub>2</sub>: 5% ethyl acetate in petroleum ether), the title compound was isolated as a white solid. Method A:

276.5 mg (0.88 mmol, 88% yield); method B: 263.9 mg (0.84 mmol, 84% yield).

**<sup>1</sup>H NMR** (500 MHz, CDCl<sub>3</sub>): δ 8.09 (t, *J* = 1.8 Hz, 1H), 7.86 (dt, *J* = 7.9, 1.3 Hz, 1H), 7.58–7.54 (m, 2H), 7.31–7.27 (m, 3H), 7.23 (t, *J* = 7.9 Hz, 1H), 5.74 (d, *J* = 7.8 Hz, 1H), 5.48 (ddd, *J* = 8.2, 6.9, 1.7 Hz, 1H), 3.53–3.34 (m, 2H).

**<sup>13</sup>C NMR** (126 MHz, CDCl<sub>3</sub>): δ 162.7, 141.7, 139.6, 134.2, 131.34, 129.9, 129.8, 128.6, 127.5, 126.9, 125.6, 125.3, 122.3, 83.4, 77.0, 39.8.

**HRMS** (ESI) *m/z* ([*M*+*H*]<sup>+</sup>) calcd for C<sub>16</sub>H<sub>13</sub>BrNO: 314.0175. Found: 314.0181.

**M.p.:** 192-193 °C.

**(3*aS*,8*aR*)-2-(3-iodophenyl)-3*a*,8*a*-dihydro-8*H*-indeno[1,2-*d*]oxazole (13)**

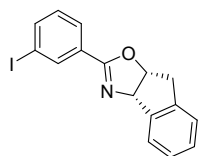

The title compound was prepared according to the general procedure. After purification by a flash column chromatography (SiO<sub>2</sub>: 5% ethyl acetate in petroleum ether), the title compound was isolated as a white solid. Method A:

339.5 mg (0.94 mmol, 94% yield); Method B: 328.7 mg (0.91 mmol, 91% yield).

**<sup>1</sup>H NMR** (500 MHz, CDCl<sub>3</sub>): δ 8.29 (t, *J* = 1.7 Hz, 1H), 7.88 (dt, *J* = 8.0, 1.4 Hz, 1H), 7.75 (dt, *J* = 7.9, 1.5 Hz, 1H), 7.58–7.54 (m, 1H), 7.30–7.26 (m, 3H), 7.10 (t, *J* = 7.9 Hz, 1H), 5.73 (d, *J* = 7.9 Hz, 1H), 5.48 (ddd, *J* = 8.3, 7.0, 1.7 Hz, 1H), 3.50 (dd, *J* = 17.9, 6.9 Hz, 1H), 3.36 (dd, *J* = 17.9, 1.6 Hz, 1H).

**<sup>13</sup>C NMR** (126 MHz, CDCl<sub>3</sub>): δ 162.5, 141.7, 140.1, 139.6, 137.1, 129.9, 129.8, 128.6, 127.5, 127.4, 125.6, 125.3, 93.7, 83.4, 77.0, 39.8.

**HRMS** (ESI) *m/z* ([*M*+*H*]<sup>+</sup>) calcd for C<sub>16</sub>H<sub>13</sub>I<sub>1</sub>NO: 362.0036. Found: 362.0031.

**M.p.:** 197.6 °C.



**(3a*S*,8a*R*)-2-(3,5-difluorophenyl)-3a,8a-dihydro-8*H*-indeno[1,2-*d*]oxazole(14)**

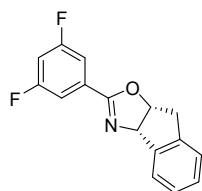

The title compound was prepared according to the general procedure. After purification by a flash column chromatography (SiO<sub>2</sub>: 5% ethyl acetate in petroleum ether), the title compound was isolated as a white solid. Method A: 268.5 mg (0.99 mmol, 99% yield); Method B: 263.1 mg (0.97 mmol, 97% yield).

**<sup>1</sup>H NMR** (500 MHz, CDCl<sub>3</sub>): δ 7.56–7.51 (m, 1H), 7.45 (dtd, *J* = 5.8, 4.6, 2.2 Hz, 2H), 7.30–7.26 (m, 2H), 7.25 (d, *J* = 5.5 Hz, 1H), 6.86 (tt, *J* = 8.7, 2.4 Hz, 1H), 5.73 (d, *J* = 7.8 Hz, 1H), 5.49 (ddd, *J* = 8.1, 6.9, 1.7 Hz, 1H), 3.52–3.33 (m, 2H).

**<sup>13</sup>C NMR** (126 MHz, CDCl<sub>3</sub>): δ 163.6 (d, *J* = 12.3 Hz), 162.6–161.0 (m), 141.5, 139.5, 131.0 (t, *J* = 10.2 Hz), 128.6, 127.6, 125.6, 125.3, 111.5 (d, *J* = 6.6 Hz), 111.3 (d, *J* = 6.7 Hz), 106.6 (t, *J* = 25.3 Hz), 83.7, 77.0, 39.7.

**HRMS** (ESI) *m/z* ([*M*+*H*]<sup>+</sup>) calcd for C<sub>16</sub>H<sub>12</sub>F<sub>2</sub>NO: 272.0881. Found: 272.0874.

**M.p.:** 160.5–161.5 °C.

**(3a*S*,8a*R*)-2-(3,4,5-trifluorophenyl)-3a,8a-dihydro-8*H*-indeno[1,2-*d*]oxazole (15)**

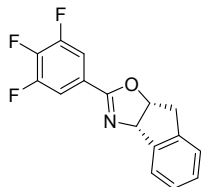

The title compound was prepared according to the general procedure. After purification by a flash column chromatography (SiO<sub>2</sub>: 5% ethyl acetate in petroleum ether), the title compound was isolated as a white solid. Method A: 248.7 mg (0.86 mmol, 86% yield); Method B: 234.3 mg (0.81 mmol, 81% yield).

**<sup>1</sup>H NMR** (500 MHz, CDCl<sub>3</sub>): δ 7.62–7.51 (m, 3H), 7.28 (q, *J* = 2.9 Hz, 3H), 5.74 (d, *J* = 7.8 Hz, 1H), 5.50 (ddd, *J* = 8.2, 6.9, 1.7 Hz, 1H), 3.54–3.33 (m, 2H).

**<sup>13</sup>C NMR** (126 MHz, CDCl<sub>3</sub>): δ 161.4 (d, *J* = 2.6 Hz), 151.9 (dd, *J* = 10.3, 3.7 Hz), 149.9 (dd, *J* = 10.3, 3.7 Hz), 142.8 (t, *J* = 15.4 Hz), 141.4, 140.7 (t, *J* = 15.2 Hz), 139.5, 128.7, 127.6, 125.5, 125.3, 123.9 (td, *J* = 8.4, 4.7 Hz), 112.9 (d, *J* = 5.7 Hz), 112.8 (d, *J* = 5.7 Hz), 84.0, 77.1, 39.7.

**HRMS** (ESI) *m/z* ([*M*+*H*]<sup>+</sup>) calcd for C<sub>16</sub>H<sub>11</sub>F<sub>3</sub>NO: 290.0787. Found: 290.0782.

**M.p.:** 186.5–187.5 °C.

**(3a*S*,8a*R*)-2-(3,5-dimethylphenyl)-3a,8a-dihydro-8*H*-indeno[1,2-*d*]oxazole (16)**

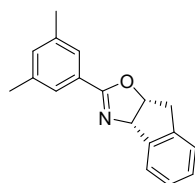

The title compound was prepared according to the general procedure A. After purification by a flash column chromatography (SiO<sub>2</sub>: 5% ethyl acetate in petroleum ether), the title compound (134.3 mg, 0.51 mmol, 51% yield) was isolated as a white solid.

**<sup>1</sup>H NMR** (500 MHz, CDCl<sub>3</sub>): δ 7.60–7.55 (m, 3H), 7.27 (t, *J* = 3.8 Hz, 1H), 7.25 (d, *J* = 3.2 Hz, 2H), 7.07 (s, 1H), 5.72 (d, *J* = 7.9 Hz, 1H), 5.46 (ddd, *J* = 8.3, 6.9, 1.8 Hz, 1H), 3.52–3.34 (m, 2H), 2.31 (s, 6H).

**<sup>13</sup>C NMR** (126 MHz, CDCl<sub>3</sub>): δ 164.3, 142.0, 139.7, 137.8, 132.9, 128.4, 127.6, 127.4, 126.0, 125.6, 125.2, 83.0, 76.9, 39.8, 21.1.

**HRMS** (ESI) *m/z* ([*M*+*H*]<sup>+</sup>) calcd for C<sub>18</sub>H<sub>18</sub>NO: 264.1383. Found: 264.1384.

**M.p.:** 166.5–167.5 °C.

**(3a*S*,8a*R*)-2-(3-bromo-5-methylphenyl)-3a,8a-dihydro-8*H*-indeno[1,2-*d*]oxazole (17)**

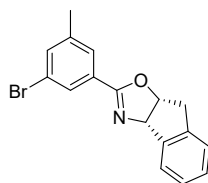

The title compound was prepared according to the general procedure. After purification by a flash column chromatography (SiO<sub>2</sub>: 5% ethyl acetate in petroleum ether), the title compound was isolated as a white solid. Method A: 265.9 mg (0.81 mmol, 81% yield); Method B: 252.7 mg (0.77 mmol, 77% yield).

**<sup>1</sup>H NMR** (500 MHz, CDCl<sub>3</sub>): δ 7.87 (t, *J* = 1.8 Hz, 1H), 7.68 (dt, *J* = 1.7, 0.9 Hz, 1H), 7.58–7.53 (m, 1H), 7.38 (dq, *J* = 1.8, 0.9 Hz, 1H), 7.30–7.26 (m, 3H), 5.73 (dd, *J* = 7.9, 0.8 Hz, 1H), 5.48 (ddd, *J* = 8.3, 6.9, 1.7 Hz, 1H), 3.53–3.33 (m, 2H), 2.32 (s, 3H).

**<sup>13</sup>C NMR** (126 MHz, CDCl<sub>3</sub>): δ 162.9, 141.7, 140.1, 139.6, 134.8, 129.5, 128.5, 128.4, 127.6, 127.5, 125.5, 125.3, 122.0, 83.4, 77.0, 39.8, 20.9.

**HRMS** (ESI) *m/z* ([*M*+*H*]<sup>+</sup>) calcd for C<sub>18</sub>H<sub>15</sub>BrNO: 328.0332. Found: 328.0324.

**M.p.:** 208.6 °C.

**(3a*S*,8a*R*)-2-(4-fluoro-3-nitrophenyl)-3a,8a-dihydro-8*H*-indeno[1,2-*d*]oxazole (18)**

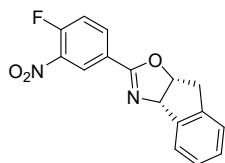

The title compound was prepared according to the general procedure A.

After purification by a flash column chromatography (SiO<sub>2</sub>: 30% ethyl acetate in petroleum ether), the title compound (259.5 mg, 0.87 mmol, 87%

yield) was isolated as a yellow solid.

**<sup>1</sup>H NMR** (500 MHz, CDCl<sub>3</sub>): δ 8.55–8.42 (m, 2H), 7.65–7.60 (m, 1H), 7.52–7.47 (m, 1H), 7.32 (d, *J* = 5.4 Hz, 1H), 7.21 (s, 1H), 6.89 (d, *J* = 8.7 Hz, 1H), 5.12 (dd, *J* = 7.8, 4.8 Hz, 1H), 4.79 (t, *J* = 4.8 Hz, 1H), 3.32–3.04 (m, 2H).

**<sup>13</sup>C NMR** (101 MHz, DMSO-*d*<sub>6</sub>): δ 148.3, 147.0, 141.0 (d, *J* = 24.7 Hz), 137.9, 136.6, 131.8 (d, *J* = 46.2 Hz), 130.7, 129.7, 127.9, 126.6, 125.3, 123.6, 120.2, 118.2 (d, *J* = 12.9 Hz), 116.6, 96.6 (d, *J* = 32.2 Hz), 71.9, 59.6, 39.7. **M.p.:** 164–166 °C.

**1-(3-((3a*S*,8a*R*)-3a,8a-dihydro-8*H*-indeno[1,2-*d*]oxazol-2-yl)phenyl)ethan-1-one (19)**

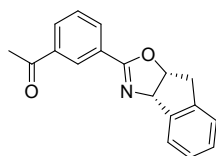

The title compound was prepared according to the general procedure A. After purification by a flash column chromatography (SiO<sub>2</sub>: 10% ethyl acetate in petroleum ether), the title compound (133.1 mg, 0.48 mmol, 48% yield) was

isolated in 48% yield as a white solid.

**<sup>1</sup>H NMR** (500 MHz, CDCl<sub>3</sub>): δ 8.47 (t, *J* = 1.8 Hz, 1H), 8.12 (dt, *J* = 7.7, 1.5 Hz, 1H), 8.03 (dt, *J* = 7.9, 1.5 Hz, 1H), 7.60–7.55 (m, 1H), 7.47 (t, *J* = 7.8 Hz, 1H), 7.31–7.26 (m, 3H), 5.82–5.72 (m, 1H), 5.52 (ddd, *J* = 8.3, 7.0, 1.7 Hz, 1H), 3.57–3.35 (m, 2H), 2.62 (s, 3H).

**<sup>13</sup>C NMR** (126 MHz, CDCl<sub>3</sub>): δ 197.4, 163.2, 141.7, 139.6, 137.1, 132.7, 130.7, 128.7, 128.6, 128.4, 128.3, 127.5, 125.6, 125.3, 83.5, 77.0, 39.7, 26.7.

**HRMS** (ESI) *m/z* ([*M*+*H*]<sup>+</sup>) calcd for C<sub>18</sub>H<sub>16</sub>NO<sub>2</sub>: 278.1176. Found: 278.1175.

**M.p.:** 119–120 °C.

**methyl 3-((3a*S*,8a*R*)-3a,8a-dihydro-8*H*-indeno[1,2-*d*]oxazol-2-yl)benzoate (20)**

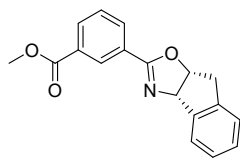

The title compound was prepared according to the general procedure. After purification by a flash column chromatography (SiO<sub>2</sub>: 10% ethyl acetate in petroleum ether), the title compound was isolated as a white solid. Method

A: 193.6 mg (0.66 mmol, 66% yield); Method B: 173.1 mg, (0.59 mmol, 59% yield).

**<sup>1</sup>H NMR** (500 MHz, CDCl<sub>3</sub>): δ 8.57 (t, *J* = 1.8 Hz, 1H), 8.12 (tt, *J* = 7.9, 1.4 Hz, 2H), 7.62–7.54 (m, 1H), 7.45 (t, *J* = 7.8 Hz, 1H), 7.30–7.26 (m, 3H), 5.76 (dd, *J* = 7.9, 0.9 Hz, 1H), 5.51 (ddd, *J* = 7.9, 6.9, 1.7 Hz, 1H), 3.92 (s, 3H), 3.55–3.36 (m, 2H).

**<sup>13</sup>C NMR** (126 MHz, CDCl<sub>3</sub>): δ 166.4, 163.2, 141.7, 139.6, 132.6, 132.2, 130.3, 129.4, 128.5, 128.4, 128.2, 127.5, 125.6, 125.3, 83.5, 77.0, 52.2, 39.7.

**HRMS** (ESI) *m/z* ([*M*+*H*]<sup>+</sup>) calcd for C<sub>18</sub>H<sub>16</sub>NO<sub>3</sub>: 294.1125. Found: 294.1124.

**M.p.:** 135–136 °C.

**(3a*S*,8a*R*)-2-(4-(methylsulfonyl)phenyl)-3a,8a-dihydro-8*H*-indeno[1,2-*d*]oxazole (21)**

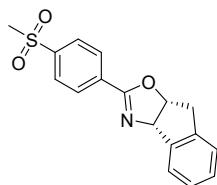

The title compound was prepared according to the general procedure. After purification by a flash column chromatography (SiO<sub>2</sub>: 1% methyl alcohol in dichloromethane), the title compound was isolated as a white solid.

Method A: 256.9 mg (0.82 mmol, 82% yield); Method B: 241.3 mg, (0.77 mmol, 77% yield).

**<sup>1</sup>H NMR** (500 MHz, CDCl<sub>3</sub>): δ 8.14–8.10 (m, 2H), 7.96–7.91 (m, 2H), 7.57–7.53 (m, 1H), 7.28 (d, *J* = 2.5 Hz, 3H), 5.78 (dd, *J* = 7.9, 0.8 Hz, 1H), 5.54 (ddd, *J* = 8.1, 6.9, 1.7 Hz, 1H), 3.56–3.35 (m, 2H), 3.03 (s, 3H).

**<sup>13</sup>C NMR** (126 MHz, CDCl<sub>3</sub>): δ 162.3, 142.6, 141.4, 139.5, 132.9, 129.2, 128.7, 127.5, 127.2, 125.5, 125.3, 83.7, 77.1, 44.3, 39.7.

**HRMS** (ESI) *m/z* ([*M*+*H*]<sup>+</sup>) calcd for C<sub>17</sub>H<sub>16</sub>NO<sub>3</sub>S: 314.0845. Found: 314.0838.

**M.p.:** 244 °C.

**4'-((3a*S*,8a*R*)-3a,8a-dihydro-8*H*-indeno[1,2-*d*]oxazol-2-yl)-[1,1'-biphenyl]-4-ol (22)**

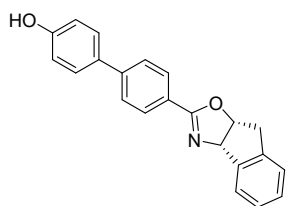

The title compound was prepared according to the general procedure.

After purification by a flash column chromatography (SiO<sub>2</sub>: 1% methyl alcohol in dichloromethane), the title compound was isolated as a white solid. Method A: 229.2 mg (0.70 mmol, 70% yield);

Method B: 199.7 mg, (0.61 mmol, 61% yield).

**<sup>1</sup>H NMR** (500 MHz, DMSO-*d*<sub>6</sub>): δ 9.69 (s, 1H), 7.88–7.86 (m, 2H), 7.67–7.65 (m, 2H), 7.56–7.54 (m, 2H), 7.48–7.45 (m, 1H), 7.31–7.29 (m, 1H), 7.27–7.25 (m, 2H), 6.88–6.86 (m, 2H), 5.71 (d, *J* = 7.9 Hz, 1H), 5.54–5.51 (m, 1H), 3.51 (dd, *J* = 18.1, 6.9 Hz, 1H), 3.27–3.23 (m, 1H).

**<sup>13</sup>C NMR** (126 MHz, DMSO-*d*<sub>6</sub>): δ 162.8, 158.2, 143.4, 142.6, 140.3, 130.0, 128.8, 128.7, 128.4, 127.5, 126.2, 125.8, 125.7, 125.6, 116.3, 83.3, 76.7, 39.7.

**HRMS** (ESI) *m/z* ([*M*+*H*]<sup>+</sup>) calcd for C<sub>22</sub>H<sub>18</sub>NO<sub>2</sub>: 328.1332. Found: 328.1326.

**M.p.:** 261-262 °C.

**(3a*S*,8a*R*)-2-(thiophen-3-yl)-3a,8a-dihydro-8*H*-indeno[1,2-*d*]oxazole (23)**

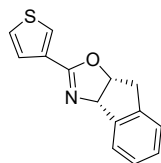

The title compound was prepared according to the general procedure. After purification by a flash column chromatography (SiO<sub>2</sub>: 5% ethyl acetate in petroleum ether), the title compound was isolated as a white solid. Method A:

219.6 mg (0.91 mmol, 91% yield); Method B: 212.4 mg, (0.88 mmol, 88% yield).

**<sup>1</sup>H NMR** (500 MHz, CDCl<sub>3</sub>): δ 7.86 (dd, *J* = 3.0, 1.2 Hz, 1H), 7.58–7.54 (m, 1H), 7.50 (dd, *J* = 5.1, 1.2 Hz, 1H), 7.31–7.26 (m, 3H), 7.25 (s, 1H), 5.71 (d, *J* = 7.8 Hz, 1H), 5.44 (ddd, *J* = 8.0, 6.9, 1.8 Hz, 1H), 3.52–3.32 (m, 2H).

**<sup>13</sup>C NMR** (126 MHz, CDCl<sub>3</sub>): δ 160.3, 141.9, 139.7, 130.0, 128.8, 128.5, 127.5, 127.3, 126.0, 125.6, 125.3, 83.0, 76.9, 39.7.

**HRMS** (ESI) *m/z* ([*M*+*H*]<sup>+</sup>) calcd for C<sub>14</sub>H<sub>12</sub>NOS: 242.0634. Found: 242.0634.

**M.p.:** 147 °C.

**(3a*S*,8a*R*)-2-(thiophen-2-yl)-3a,8a-dihydro-8*H*-indeno[1,2-*d*]oxazole (24)**

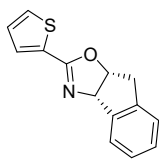

The title compound was prepared according to the general procedure. After purification by a flash column chromatography (SiO<sub>2</sub>: 5% ethyl acetate in petroleum ether), the title compound was isolated as a white solid. Method A:

229.2 mg (0.95 mmol, 95% yield); Method B: 219.6 mg, (0.91 mmol, 91% yield).

**<sup>1</sup>H NMR** (500 MHz, CDCl<sub>3</sub>):  $\delta$  7.60–7.54 (m, 2H), 7.40 (dd,  $J = 5.0, 1.2$  Hz, 1H), 7.27 (d,  $J = 3.1$  Hz, 2H), 7.25 (d,  $J = 1.3$  Hz, 1H), 7.02 (dd,  $J = 5.0, 3.7$  Hz, 1H), 5.71 (d,  $J = 7.8$  Hz, 1H), 5.47 (ddd,  $J = 8.1, 6.8, 1.8$  Hz, 1H), 3.51–3.33 (m, 2H).

**<sup>13</sup>C NMR** (126 MHz, CDCl<sub>3</sub>):  $\delta$  159.7, 141.7, 139.6, 130.4, 129.8, 128.5, 127.5, 125.7, 125.3, 83.7, 77.1, 39.6.

**HRMS** (ESI)  $m/z$  ( $[M+H]^+$ ) calcd for C<sub>14</sub>H<sub>12</sub>NOS: 242.0634. Found: 242.0637.

**M.p.:** 156.5-157.5 °C.

**(3a*S*,8a*R*)-2-(4-bromothiophen-2-yl)-3a,8a-dihydro-8*H*-indeno[1,2-*d*]oxazole (25)**

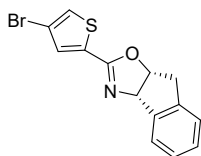

The title compound was prepared according to the general procedure. After purification by a flash column chromatography (SiO<sub>2</sub>: 5% ethyl acetate in petroleum ether), the title compound was isolated as a white solid. Method

A: 297.8 mg (0.93 mmol, 93% yield); Method B: 281.8 mg, (0.88 mmol, 88% yield).

**<sup>1</sup>H NMR** (500 MHz, CDCl<sub>3</sub>):  $\delta$  7.56–7.53 (m, 1H), 7.48 (d,  $J = 1.5$  Hz, 1H), 7.30–7.26 (m, 4H), 5.72 (dd,  $J = 7.8, 0.7$  Hz, 1H), 5.48 (ddd,  $J = 7.8, 6.8, 1.7$  Hz, 1H), 3.51–3.33 (m, 2H).

**<sup>13</sup>C NMR** (126 MHz, CDCl<sub>3</sub>):  $\delta$  158.5, 141.4, 139.5, 132.5, 131.5, 128.6, 127.5, 126.9, 125.6, 125.3, 110.1, 84.0, 77.1, 39.5.

**HRMS** (ESI)  $m/z$  ( $[M+H]^+$ ) calcd for C<sub>14</sub>H<sub>11</sub>BrNOS: 319.9739. Found: 319.9738.

**M.p.:** 162-163 °C.

**(3a*S*,8a*R*)-2-(5-bromothiophen-2-yl)-3a,8a-dihydro-8*H*-indeno[1,2-*d*]oxazole (26)**

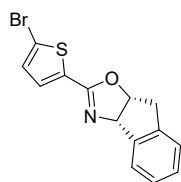

The title compound was prepared according to the general procedure. After purification by a flash column chromatography (SiO<sub>2</sub>: 5% ethyl acetate in petroleum ether), the title compound was isolated as a white solid. Method A:

294.6 mg (0.92 mmol, 92% yield); Method B: 281.8 mg, (0.88 mmol, 88% yield).

**<sup>1</sup>H NMR** (500 MHz, CDCl<sub>3</sub>): δ 7.55–7.51 (m, 1H), 7.30 (d, *J* = 3.9 Hz, 1H), 7.29–7.26 (m, 2H), 7.25 (s, 1H), 6.98 (d, *J* = 3.9 Hz, 1H), 5.68 (d, *J* = 7.8 Hz, 1H), 5.45 (ddd, *J* = 7.9, 6.9, 1.7 Hz, 1H), 3.49–3.32 (m, 2H).

**<sup>13</sup>C NMR** (126 MHz, CDCl<sub>3</sub>): δ 158.6, 141.5, 139.5, 131.9, 130.6, 130.5, 128.6, 127.5, 125.6, 125.3, 117.3, 83.8, 77.0, 39.5.

**HRMS** (ESI) *m/z* ([*M*+*H*]<sup>+</sup>) calcd for C<sub>14</sub>H<sub>11</sub>BrNOS: 319.9739. Found: 319.9742.

**M.p.:** 177–178 °C.

**(3a*S*,8a*R*)-2-(1*H*-pyrrol-2-yl)-3a,8a-dihydro-8*H*-indeno[1,2-*d*]oxazole (27)**

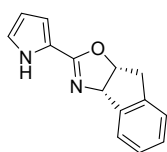

The title compound was prepared according to the general procedure. After purification by a flash column chromatography (SiO<sub>2</sub>: 5% ethyl acetate in petroleum ether), the title compound was isolated as a red brown solid. Method A:

188.4 mg (0.84 mmol, 84% yield); Method B: 174.9 mg, (0.78 mmol, 78% yield).

**<sup>1</sup>H NMR** (500 MHz, CDCl<sub>3</sub>): δ 10.94 (s, 1H), 7.39 (d, *J* = 6.9 Hz, 1H), 7.27 (d, *J* = 2.8 Hz, 1H), 7.25 (d, *J* = 2.1 Hz, 1H), 7.19 (ddt, *J* = 7.9, 5.3, 2.6 Hz, 1H), 6.74 (d, *J* = 21.4 Hz, 2H), 6.19 (t, *J* = 2.9 Hz, 1H), 5.73–5.69 (m, 1H), 5.49–5.44 (m, 1H), 3.52–3.35 (m, 2H).

**<sup>13</sup>C NMR** (126 MHz, CDCl<sub>3</sub>): δ 159.2, 141.8, 139.7, 128.5, 127.5, 125.6, 125.3, 122.7, 119.8, 113.3, 109.5, 83.3, 76.0, 39.6.

**HRMS** (ESI) *m/z* ([*M*+*H*]<sup>+</sup>) calcd for C<sub>14</sub>H<sub>13</sub>N<sub>2</sub>O: 225.1022. Found: 225.1022.

**M.p.:** 158.5–159.5 °C.

**(3a*S*,8a*R*)-2-(pyridin-2-yl)-3a,8a-dihydro-8*H*-indeno[1,2-*d*]oxazole (28)**

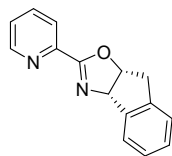

The title compound was prepared according to the general procedure. After purification by a flash column chromatography (SiO<sub>2</sub>: 30% ethyl acetate in petroleum ether), the title compound was isolated as a pale-yellow solid. Method

A: 155.9 mg (0.66 mmol, 66% yield); Method B: 125.2 mg, (0.53 mmol, 53% yield).

**<sup>1</sup>H NMR** (500 MHz, CDCl<sub>3</sub>): δ 9.12 (dd, *J* = 2.2, 0.9 Hz, 1H), 8.66 (dd, *J* = 4.9, 1.8 Hz, 1H), 8.19 (dt, *J* = 8.0, 1.9 Hz, 1H), 7.59–7.54 (m, 1H), 7.32–7.27 (m, 4H), 5.78–5.74 (m, 1H), 5.51 (ddd, *J* = 8.2, 6.9, 1.7 Hz, 1H), 3.55–3.35 (m, 2H).

**<sup>13</sup>C NMR** (126 MHz, CDCl<sub>3</sub>): δ 162.0, 151.9, 149.5, 141.6, 139.6, 135.7, 128.6, 127.5, 125.6, 125.3, 124.0, 123.1, 83.5, 77.0, 39.7.

**HRMS** (ESI) *m/z* ([*M*+*H*]<sup>+</sup>) calcd for C<sub>15</sub>H<sub>13</sub>N<sub>2</sub>O: 237.1022. Found: 237.1016.

**M.p.:** 166 °C.

**(3a*S*,8a*R*)-2-(furan-2-yl)-3a,8a-dihydro-8*H*-indeno[1,2-*d*]oxazole (29)**

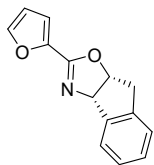

The title compound was prepared according to the general procedure. After purification by a flash column chromatography (SiO<sub>2</sub>: 5% ethyl acetate in petroleum ether), the title compound was isolated as a pale-yellow solid. Method A: 220.7 mg (0.98 mmol, 98% yield); Method B: 211.7 mg, (0.94 mmol, 94% yield).

**<sup>1</sup>H NMR** (500 MHz, CDCl<sub>3</sub>): δ 7.60–7.54 (m, 1H), 7.49 (d, *J* = 1.7 Hz, 1H), 7.27 (d, *J* = 3.5 Hz, 1H), 7.25 (s, 2H), 6.93 (d, *J* = 3.5 Hz, 1H), 6.44 (dd, *J* = 3.5, 1.8 Hz, 1H), 5.73 (d, *J* = 7.7 Hz, 1H), 5.46 (ddd, *J* = 8.2, 6.9, 1.7 Hz, 1H), 3.51–3.33 (m, 2H).

**<sup>13</sup>C NMR** (126 MHz, CDCl<sub>3</sub>): δ 156.3, 145.1, 142.9, 141.5, 139.5, 128.5, 127.5, 125.7, 125.2, 114.4, 111.4, 83.5, 76.8, 39.5.

**HRMS** (ESI) *m/z* ([*M*+*H*]<sup>+</sup>) calcd for C<sub>14</sub>H<sub>12</sub>NO<sub>2</sub>: 226.0863. Found: 226.0858.

**M.p.:** 134 °C.

**(3a*S*,8a*R*)-2-(benzofuran-2-yl)-3a,8a-dihydro-8*H*-indeno[1,2-*d*]oxazole (30)**

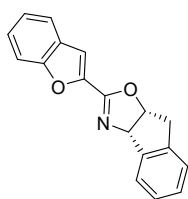

The title compound was prepared according to the general procedure. After purification by a flash column chromatography (SiO<sub>2</sub>: 5% ethyl acetate in petroleum ether), the title compound was isolated as a white solid. Method A: 269.8 mg (0.98 mmol, 98% yield); Method B: 256.0 mg, (0.93 mmol, 93% yield).

**<sup>1</sup>H NMR** (500 MHz, CDCl<sub>3</sub>): δ 7.64–7.59 (m, 2H), 7.55 (dt, *J* = 8.4, 0.9 Hz, 1H), 7.36 (ddd, *J* = 8.5, 7.2, 1.3 Hz, 1H), 7.31–7.27 (m, 4H), 7.26–7.23 (m, 1H), 5.81 (d, *J* = 7.8 Hz, 1H), 5.53 (ddd, *J* = 7.9, 6.9, 1.7 Hz, 1H), 3.55–3.38 (m, 2H).

**<sup>13</sup>C NMR** (126 MHz, CDCl<sub>3</sub>): δ 156.8, 155.5, 144.2, 141.3, 139.5, 128.7, 127.6, 127.2, 126.6, 125.8, 125.3, 123.5, 122.1, 112.0, 110.7, 83.8, 77.1, 39.6.

**HRMS** (ESI) *m/z* ([*M*+*H*]<sup>+</sup>) calcd for C<sub>18</sub>H<sub>14</sub>NO<sub>2</sub>: 276.1019. Found: 276.1012.

**M.p.:** 219.5–220.5 °C.



**(3a*S*,8a*R*)-2-(benzo[*d*][1,3]dioxol-5-yl)-3a,8a-dihydro-8*H*-indeno[1,2-*d*]oxazole(31)**

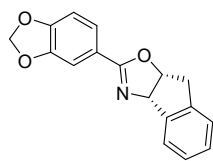

The title compound was prepared according to the general procedure A. After purification by a flash column chromatography (SiO<sub>2</sub>: 5% ethyl acetate in petroleum ether), the title compound (117.3 mg, 0.42 mmol, 42% yield) was isolated as a white solid.

**<sup>1</sup>H NMR** (500 MHz, CDCl<sub>3</sub>): δ 7.54 (dt, *J* = 4.7, 3.0 Hz, 1H), 7.47 (dd, *J* = 8.1, 1.7 Hz, 1H), 7.39 (d, *J* = 1.7 Hz, 1H), 7.27 (d, *J* = 4.5 Hz, 1H), 7.25 (d, *J* = 3.3 Hz, 2H), 6.77 (d, *J* = 8.2 Hz, 1H), 5.96 (q, *J* = 1.4 Hz, 2H), 5.69 (dd, *J* = 7.9, 0.8 Hz, 1H), 5.44 (ddd, *J* = 7.9, 6.9, 1.7 Hz, 1H), 3.50–3.31 (m, 2H).

**<sup>13</sup>C NMR** (126 MHz, CDCl<sub>3</sub>): δ 163.5, 150.1, 147.5, 142.0, 139.7, 128.4, 127.4, 125.5, 125.2, 123.3, 121.8, 108.5, 107.9, 101.4, 83.1, 76.8, 39.7.

**HRMS** (ESI) *m/z* ([*M*+*H*]<sup>+</sup>) calcd for C<sub>17</sub>H<sub>14</sub>NO<sub>3</sub>: 280.0968. Found: 280.0969.

**M.p.:** 243.5 °C.

**5-((3a*S*,8a*R*)-3a,8a-dihydro-8*H*-indeno[1,2-*d*]oxazol-2-yl)isobenzofuran-1(3*H*)-one (32)**

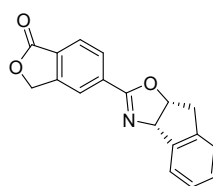

The title compound was prepared according to the general procedure. After purification by a flash column chromatography (SiO<sub>2</sub>: 20% ethyl acetate in petroleum ether), the title compound was isolated as a pale-yellow solid.

Method A: 279.7 mg (0.96 mmol, 96% yield); Method B: 273.8 mg, (0.94 mmol, 94% yield).

**<sup>1</sup>H NMR** (500 MHz, CDCl<sub>3</sub>): δ 8.10–8.05 (m, 2H), 7.90 (d, *J* = 7.8 Hz, 1H), 7.57–7.54 (m, 1H), 7.30–7.27 (m, 3H), 5.78 (d, *J* = 7.8 Hz, 1H), 5.55 (ddd, *J* = 8.2, 6.9, 1.7 Hz, 1H), 5.29 (d, *J* = 3.1 Hz, 2H), 3.56–3.36 (m, 2H).

**<sup>13</sup>C NMR** (126 MHz, CDCl<sub>3</sub>): δ 170.2, 162.8, 146.3, 141.4, 139.5, 133.4, 129.2, 128.7, 127.9, 127.6, 125.6, 125.5, 125.4, 122.1, 83.8, 77.1, 69.5, 39.7.

**HRMS** (ESI) *m/z* ([*M*+*Na*]<sup>+</sup>) calcd for C<sub>18</sub>H<sub>13</sub>NNaO<sub>3</sub>: 314.0788. Found: 314.0780.

**M.p.:** 309–310 °C.

**(3a*S*,8a*R*)-2-((1*H*-benzo[*d*]imidazol-2-yl)methyl)-3a,8a-dihydro-8*H*-indeno[1,2-*d*]oxazole (33)**

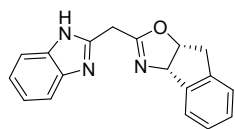

The title compound was prepared according to the general procedure A. After purification by a flash column chromatography (SiO<sub>2</sub>: 5% methyl alcohol in dichloromethane), the title compound (144.7 mg, 0.50 mmol, 50% yield) was isolated as a red brown solid.

**<sup>1</sup>H NMR** (500 MHz, CDCl<sub>3</sub>): δ 7.51 (dd, *J* = 6.0, 3.2 Hz, 2H), 7.49–7.45 (m, 1H), 7.28 (d, *J* = 7.8 Hz, 1H), 7.23 (dd, *J* = 6.3, 2.4 Hz, 2H), 7.19 (dd, *J* = 6.0, 3.2 Hz, 2H), 5.60 (dd, *J* = 7.9, 1.3 Hz, 1H), 5.37 (ddd, *J* = 8.3, 7.0, 1.7 Hz, 1H), 3.96 (qd, *J* = 19.1, 1.2 Hz, 2H), 3.47–3.25 (m, 2H).

**<sup>13</sup>C NMR** (126 MHz, CDCl<sub>3</sub>): δ 164.1, 147.8, 141.2, 139.6, 128.8, 127.5, 125.4, 125.3, 122.2, 83.4, 76.3, 39.5, 28.2.

**HRMS** (ESI) *m/z* ([*M*+*H*]<sup>+</sup>) calcd for C<sub>18</sub>H<sub>16</sub>N<sub>3</sub>O: 290.1288. Found: 290.1289.

**M.p.:** 213–215 °C.

**(3a*S*,8a*R*)-2-cyclohexyl-3a,8a-dihydro-8*H*-indeno[1,2-*d*]oxazole (34)**

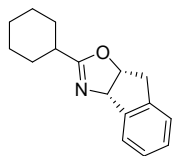

The title compound was prepared according to the general procedure A. After purification by a flash column chromatography (SiO<sub>2</sub>: 10% ethyl acetate in petroleum ether), the title compound (55.5 mg, 0.23 mmol, 23% yield) was isolated as a colorless oil.

**<sup>1</sup>H NMR** (500 MHz, CDCl<sub>3</sub>): δ 7.22 (dt, *J* = 9.5, 2.6 Hz, 4H), 5.34 (dd, *J* = 8.4, 5.1 Hz, 1H), 4.59 (td, *J* = 5.2, 2.3 Hz, 1H), 3.15 (dd, *J* = 16.5, 5.3 Hz, 1H), 2.92 (dd, *J* = 16.5, 2.3 Hz, 1H), 2.22–2.18 (m, 1H), 1.83–1.65 (m, 4H), 1.42 (s, 2H), 1.40–1.31 (m, 4H).

**<sup>13</sup>C NMR** (126 MHz, CDCl<sub>3</sub>): δ 177.0, 140.8, 139.9, 128.2, 127.2, 125.3, 124.5, 73.7, 57.2, 45.6, 39.7, 31.4, 29.7, 25.7.

**HRMS** (ESI) *m/z* ([*M*+*H*]<sup>+</sup>) calcd for C<sub>16</sub>H<sub>19</sub>NNaO: 264.1359. Found: 264.1349.

**3-((3a*S*,8a*R*)-3a,8a-dihydro-8*H*-indeno[1,2-*d*]oxazol-2-yl)benzotrile (35a)**

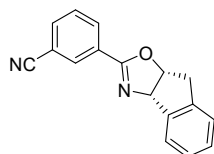

The title compound was prepared according to the general procedure using (1*S*,2*R*)-1-amino-2,3-dihydro-1*H*-inden-2-ol (447.6 mg, 3 mmol, 300 mol %), benzonitrile (154.7 mg, 1.5 mmol, 150 mol %), chlorobenzene (3 mL). After purification by a flash column chromatography (SiO<sub>2</sub>: 10% ethyl acetate in petroleum ether), the title compound (105.4 mg, 0.40 mmol, 27% yield) was isolated as a white solid.

**<sup>1</sup>H NMR** (500 MHz, CDCl<sub>3</sub>): δ 8.21 (d, *J* = 1.8 Hz, 1H), 8.14 (dt, *J* = 7.9, 1.6 Hz, 1H), 7.69 (dd, *J* = 7.7, 1.6 Hz, 1H), 7.57–7.53 (m, 1H), 7.47 (td, *J* = 7.8, 1.4 Hz, 1H), 7.30–7.26 (m, 3H), 5.76 (d, *J* = 7.9 Hz, 1H), 5.54–5.49 (m, 1H), 3.55–3.34 (m, 2H).

**<sup>13</sup>C NMR** (126 MHz, CDCl<sub>3</sub>): δ 162.0, 141.4, 139.5, 134.3, 132.4, 131.9, 129.2, 129.1, 128.7, 127.6, 125.5, 125.4, 118.0, 112.6, 83.8, 77.1, 39.7.

**HRMS** (ESI) *m/z* ([*M*+*H*]<sup>+</sup>) calcd for C<sub>17</sub>H<sub>13</sub>N<sub>2</sub>O: 261.1022. Found: 261.1017.

**M.p.:** 218 °C.

### 1,3-bis((3*aS*,8*aR*)-3*a*,8*a*-dihydro-8*H*-indeno[1,2-*d*]oxazol-2-yl)benzene (35b)

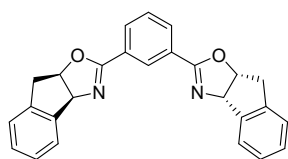

The title compound was prepared according to the general procedure using (1*S*,2*R*)-1-amino-2,3-dihydro-1*H*-inden-2-ol (447.6 mg, 3 mmol, 300 mol %), benzonitrile (154.7 mg, 1.5 mmol, 150 mol %), chlorobenzene (3 mL). After purification by a flash column chromatography (SiO<sub>2</sub>: 10% ethyl acetate in petroleum ether), the title compound (394.4 mg, 1.01 mmol, 67% yield) was isolated as a white solid.

**<sup>1</sup>H NMR** (500 MHz, CDCl<sub>3</sub>): δ 8.45 (s, 1H), 8.02 (dd, *J* = 7.8, 1.7 Hz, 2H), 7.58–7.55 (m, 2H), 7.38 (t, *J* = 7.8 Hz, 1H), 7.27 (d, *J* = 4.5 Hz, 2H), 7.25 (t, *J* = 2.4 Hz, 4H), 5.73 (d, *J* = 7.9 Hz, 2H), 5.48 (ddd, *J* = 8.1, 7.0, 1.7 Hz, 2H), 3.49 (dd, *J* = 17.9, 6.8 Hz, 2H), 3.36 (dd, *J* = 17.9, 1.6 Hz, 2H).

**<sup>13</sup>C NMR** (126 MHz, CDCl<sub>3</sub>): δ 163.3, 141.8, 139.7, 131.0, 128.5, 128.3, 128.2, 128.0, 127.5, 125.6, 125.3, 83.3, 77.0, 39.7.

**HRMS** (ESI) *m/z* ([*M*+*H*]<sup>+</sup>) calcd for C<sub>26</sub>H<sub>21</sub>N<sub>2</sub>O<sub>2</sub>: 393.1598. Found: 393.1595.

**M.p.:** 313-315 °C.

### (*S*)-2,4-diphenyl-4,5-dihydrooxazole (36)

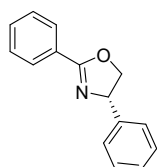

The title compound was prepared according to the general procedure. After purification by a flash column chromatography (SiO<sub>2</sub>: 5% ethyl acetate in petroleum ether), the title compound was isolated as a colorless oil. Method A: 136.2 mg (0.61 mmol, 61% yield); Method B: 140.7 mg, (0.63 mmol, 63% yield).

**<sup>1</sup>H NMR** (500 MHz, CDCl<sub>3</sub>): δ 8.10–8.00 (m, 2H), 7.54–7.27 (m, 8H), 5.37 (dd, *J* = 10.1, 8.1 Hz, 1H), 4.77 (dd, *J* = 10.1, 8.4 Hz, 1H), 4.25 (t, *J* = 8.3 Hz, 1H).

**<sup>13</sup>C NMR** (126 MHz, CDCl<sub>3</sub>): δ 164.8, 142.4, 131.6, 128.8, 128.5, 128.4, 127.6, 127.5, 126.8, 74.9, 70.1.

**HRMS** (ESI)  $m/z$  ( $[M+H]^+$ ) calcd for  $C_{15}H_{14}NO$ : 224.1070. Found: 224.1061.

**(S)-2,5-diphenyl-4,5-dihydrooxazole (37)**

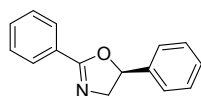

The title compound was prepared according to the general procedure A. After purification by a flash column chromatography ( $SiO_2$ : 5% ethyl acetate in petroleum ether), the title compound (100.5 mg, 0.45 mmol, 45% yield) was isolated as a colorless oil.

**$^1H$  NMR** (500 MHz,  $CDCl_3$ ):  $\delta$  8.07–8.00 (m, 2H), 7.54–7.48 (m, 1H), 7.44 (dd,  $J = 8.2, 6.6$  Hz, 2H), 7.41–7.33 (m, 5H), 5.67 (dd,  $J = 10.2, 7.9$  Hz, 1H), 4.52–3.98 (m, 2H).

**$^{13}C$  NMR** (126 MHz,  $CDCl_3$ ):  $\delta$  164.0, 141.0, 131.5, 128.8, 128.4, 128.3, 127.6, 125.7, 81.0, 63.1.

**HRMS** (ESI)  $m/z$  ( $[M+H]^+$ ) calcd for  $C_{15}H_{14}NO$ : 224.1070. Found: 224.1064.

**(S)-4-benzyl-2-phenyl-4,5-dihydrooxazole (38)**

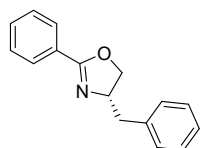

The title compound was prepared according to the general procedure A. After purification by a flash column chromatography ( $SiO_2$ : 5% ethyl acetate in petroleum ether), the title compound (90.2 mg, 0.38 mmol, 38% yield) was isolated as a colorless oil.

**$^1H$  NMR** (500 MHz,  $CDCl_3$ ):  $\delta$  8.00–7.91 (m, 2H), 7.51–7.39 (m, 3H), 7.34–7.29 (m, 2H), 7.27 (d,  $J = 1.6$  Hz, 1H), 7.25 (t,  $J = 3.9$  Hz, 2H), 4.66–4.55 (m, 1H), 4.35 (t,  $J = 8.9$  Hz, 1H), 4.15 (dd,  $J = 8.5, 7.3$  Hz, 1H), 3.29–3.22 (m, 1H), 2.74 (dd,  $J = 13.7, 8.9$  Hz, 1H).

**$^{13}C$  NMR** (126 MHz,  $CDCl_3$ ):  $\delta$  164.0, 137.9, 131.4, 129.3, 128.6, 128.5, 128.4, 128.3, 128.2, 127.7, 126.5, 71.8, 67.8, 41.8.

**HRMS** (ESI)  $m/z$  ( $[M+Na]^+$ ) calcd for  $C_{16}H_{15}NNaO$ : 260.1046. Found: 260.1042.

**(S)-4-isopropyl-2-phenyl-4,5-dihydrooxazole (40)**

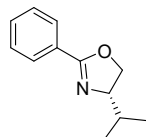

The title compound was prepared according to the general procedure. After purification by a flash column chromatography ( $SiO_2$ : 5% ethyl acetate in petroleum ether), the title compound was isolated as a colorless oil. Method A: 145.7 mg (0.77 mmol, 77% yield); Method B: 138.2 mg, (0.73 mmol, 73% yield).

**$^1H$  NMR** (500 MHz,  $CDCl_3$ ):  $\delta$  8.03–7.88 (m, 2H), 7.48–7.36 (m, 3H), 4.43–4.35 (m, 1H), 4.17–4.05 (m, 2H), 1.93–1.82 (m, 1H), 1.03 (dd,  $J = 6.8, 1.3$  Hz, 3H), 0.92 (dd,  $J = 6.8, 1.3$  Hz, 3H).

**$^{13}C$  NMR** (126 MHz,  $CDCl_3$ ):  $\delta$  163.4, 131.1, 128.2, 127.9, 72.5, 70.0, 32.8, 18.9, 18.0.

**HRMS** (ESI)  $m/z$  ( $[M+H]^+$ ) calcd for  $C_{12}H_{16}NO$ : 190.1226. Found: 190.1226.

**(S)-4-(tert-butyl)-2-phenyl-4,5-dihydrooxazole (41)**

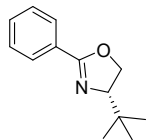

The title compound was prepared according to the general procedure. After purification by a flash column chromatography ( $SiO_2$ : 5% ethyl acetate in petroleum ether), the title compound was isolated as a colorless oil. Method A: 148.4 mg (0.73 mmol, 73% yield); Method B: 142.3 mg, (0.70 mmol, 70% yield).

**$^1H$  NMR** (500 MHz,  $CDCl_3$ ):  $\delta$  7.99–7.93 (m, 1H), 7.52–7.37 (m, 3H), 7.18–7.13 (m, 1H), 4.75–4.30 (m, 2H), 4.27–4.00 (m, 1H), 1.02 (s, 6H), 0.95 (s, 3H).

**$^{13}C$  NMR** (126 MHz,  $CDCl_3$ ):  $\delta$  167.4, 163.3, 131.6, 131.1, 128.4, 128.2 (d,  $J = 2.0$  Hz), 128.1, 126.1, 112.3, 69.9, 68.7, 37.1, 25.8, 25.0.

**HRMS** (ESI)  $m/z$  ( $[M+H]^+$ ) calcd for  $C_{13}H_{18}NO$ : 204.1383. Found: 204.1376.

**(S)-4-cyclohexyl-2-phenyl-4,5-dihydrooxazole (42)**

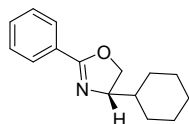

The title compound was prepared according to the general procedure. After purification by a flash column chromatography ( $SiO_2$ : 5% ethyl acetate in petroleum ether), the title compound was isolated as a colorless oil. Method A: 160.5 mg (0.70 mmol, 70% yield); Method B: 126.1 mg, (0.55 mmol, 55% yield).

**$^1H$  NMR** (500 MHz,  $CDCl_3$ ):  $\delta$  8.05–7.82 (m, 2H), 7.49–7.33 (m, 3H), 4.38 (dd,  $J = 9.6, 8.2$  Hz, 1H), 4.15 (t,  $J = 8.0$  Hz, 1H), 4.08 (ddd,  $J = 9.6, 7.9, 6.4$  Hz, 1H), 1.98–1.93 (m, 1H), 1.80–1.65 (m, 4H), 1.64–1.49 (m, 2H), 1.29–1.17 (m, 4H).

**$^{13}C$  NMR** (126 MHz,  $CDCl_3$ ):  $\delta$  163.3, 131.1, 128.2, 71.6, 70.3, 42.8, 29.5, 28.7, 26.5, 26.1, 26.0.

**HRMS** (ESI)  $m/z$  ( $[M+H]^+$ ) calcd for  $C_{15}H_{20}NO$ : 230.1539. Found: 230.1531.

**(S)-4-((R)-sec-butyl)-2-phenyl-4,5-dihydrooxazole (43)**

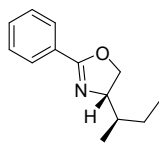

The title compound was prepared according to the general procedure. After purification by a flash column chromatography (SiO<sub>2</sub>: 5% ethyl acetate in petroleum ether), the title compound was isolated as a colorless oil. Method A: 191.1 mg (0.94 mmol, 94% yield); Method B: 176.9 mg, (0.87 mmol, 87% yield).

**<sup>1</sup>H NMR** (500 MHz, CDCl<sub>3</sub>): δ 7.98–7.89 (m, 2H), 7.54–7.33 (m, 3H), 4.33 (dd, *J* = 9.6, 7.9 Hz, 1H), 4.23–4.17 (m, 1H), 4.10 (t, *J* = 7.8 Hz, 1H), 1.73–1.53 (m, 2H), 1.24–1.16 (m, 1H), 0.94 (d, *J* = 7.4 Hz, 3H), 0.83 (d, *J* = 6.8 Hz, 3H).

**<sup>13</sup>C NMR** (126 MHz, CDCl<sub>3</sub>): δ 163.3, 131.1, 128.2, 71.0, 69.4, 39.0, 26.1, 14.2, 11.6.

**HRMS** (ESI) *m/z* ([*M*+*H*]<sup>+</sup>) calcd for C<sub>13</sub>H<sub>18</sub>NO: 204.1383. Found: 204.1381.

**2-phenyl-4,5-dihydrothiazole (44)**

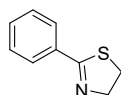

The title compound was prepared according to the general procedure. After purification by a flash column chromatography (SiO<sub>2</sub>: 5% ethyl acetate in petroleum ether), the title compound was isolated as a light-yellow oil. Method A: 120.8 mg (0.74 mmol, 74% yield); Method B: 117.5 mg, (0.72 mmol, 72% yield).

**<sup>1</sup>H NMR** (500 MHz, CDCl<sub>3</sub>): δ 7.91–7.75 (m, 2H), 7.51–7.34 (m, 3H), 4.45 (t, *J* = 8.3 Hz, 2H), 3.41 (t, *J* = 8.3 Hz, 2H).

**<sup>13</sup>C NMR** (126 MHz, CDCl<sub>3</sub>): δ 168.5, 133.2, 131.1, 128.5, 128.3, 65.2, 33.6.

**HRMS** (ESI) *m/z* ([*M*+*H*]<sup>+</sup>) calcd for C<sub>9</sub>H<sub>10</sub>NS: 164.0528. Found: 164.0522.

**methyl (S)-2-phenyl-4,5-dihydrothiazole-4-carboxylate (45)**

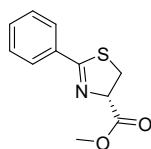

The title compound was prepared according to the general procedure A. After purification by a flash column chromatography (SiO<sub>2</sub>: 5% ethyl acetate in petroleum ether), the title compound (79.7 mg, 0.36 mmol, 36% yield) was isolated as a colorless oil

**<sup>1</sup>H NMR** (500 MHz, CDCl<sub>3</sub>): δ 7.90–7.87 (m, 2H), 7.5–7.40 (m, 3H), 5.31 (t, *J* = 9.0 Hz, 1H), 3.84 (s, 3H), 3.83–3.80 (m, 2H).

**<sup>13</sup>C NMR** (126 MHz, CDCl<sub>3</sub>): δ 171.2, 132.4, 131.9, 128.72, 128.6, 65.7, 52.9, 35.3, 29.7.

**HRMS** (ESI) *m/z* ([*M*+*H*]<sup>+</sup>) calcd for C<sub>11</sub>H<sub>12</sub>NO<sub>2</sub>S: 222.0583. Found: 222.0576.

## II. Spectral Data for New Compounds

### 1. NMR and Microwave Data for New Compounds

#### NMR spectra and microwave data of compound 3

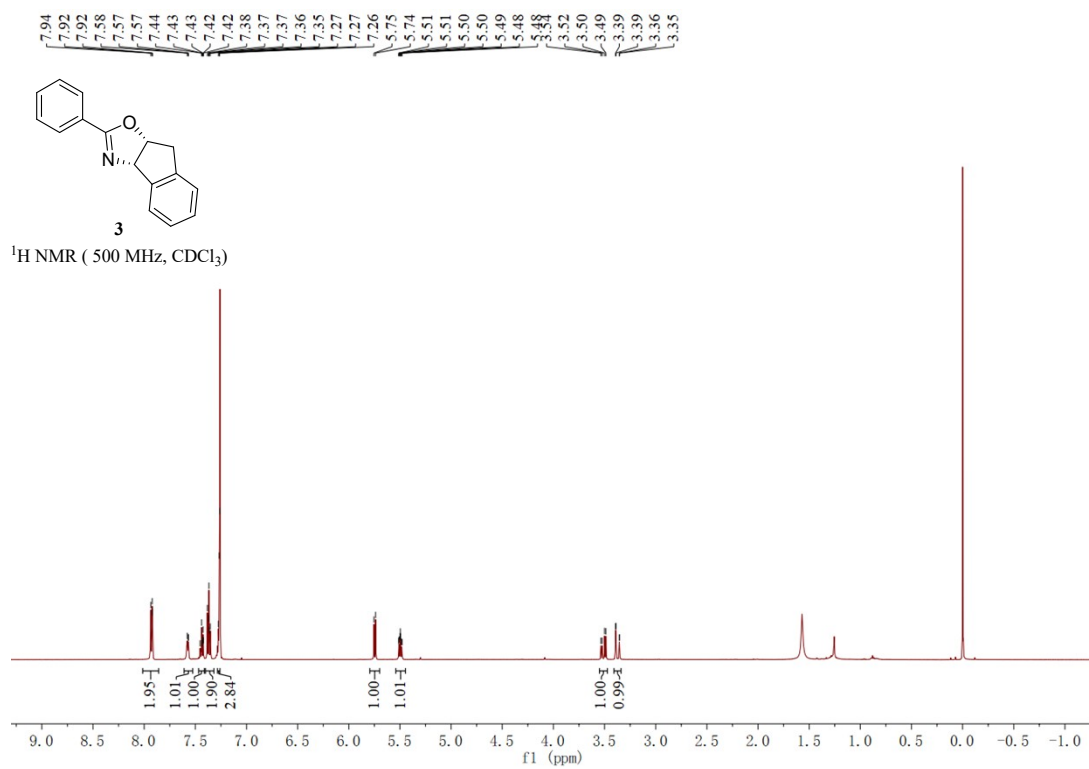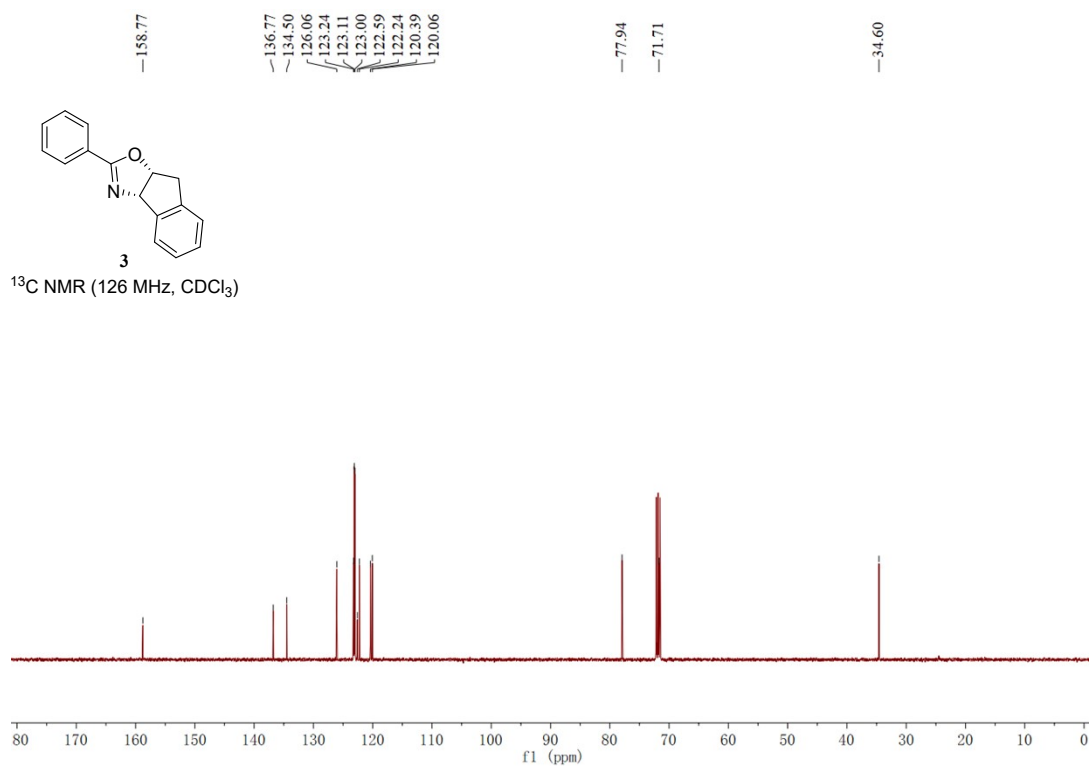

Temperature (°C)

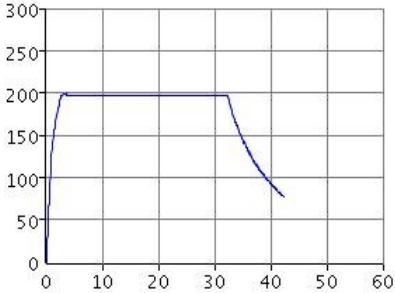

Pressure (bar)

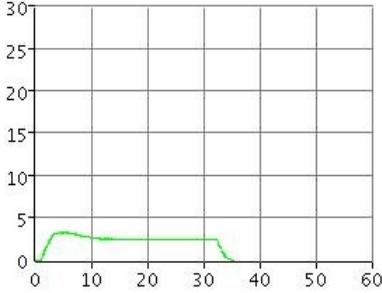

Power (W)

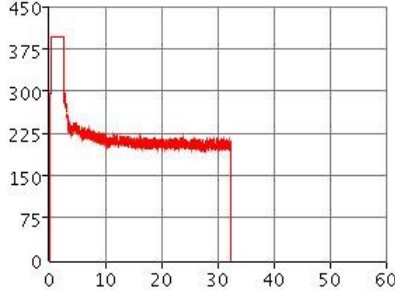



## NMR spectra and microwave data of compound 4

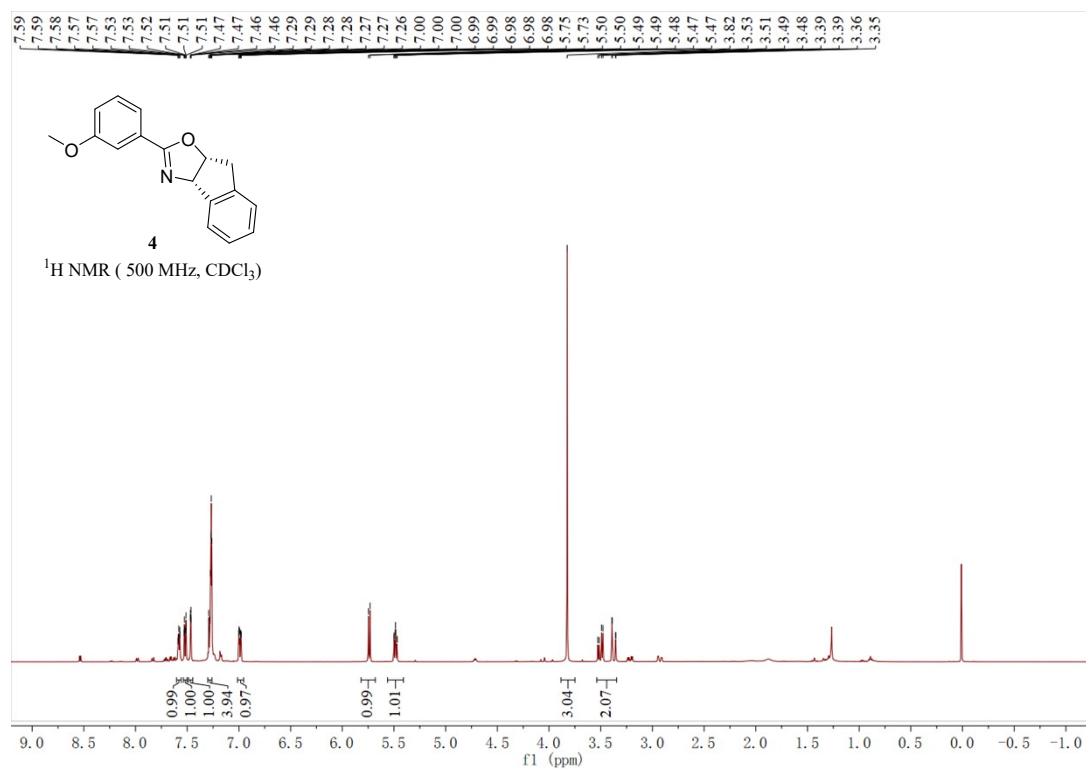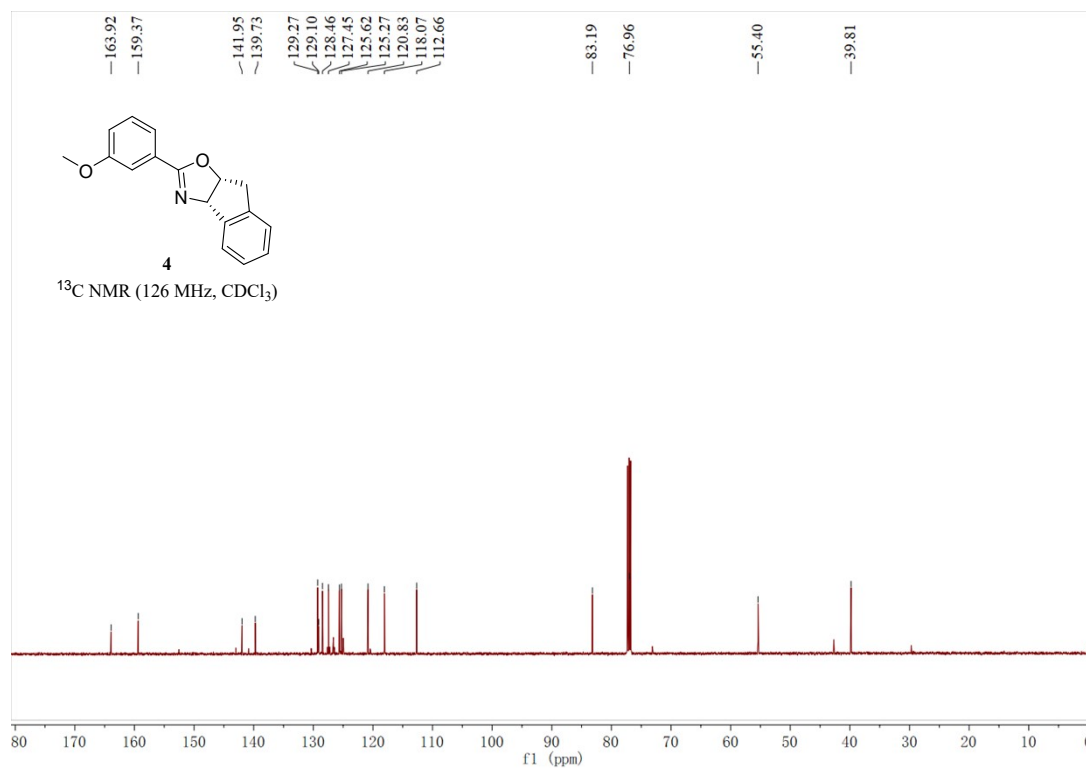

Temperature (°C)

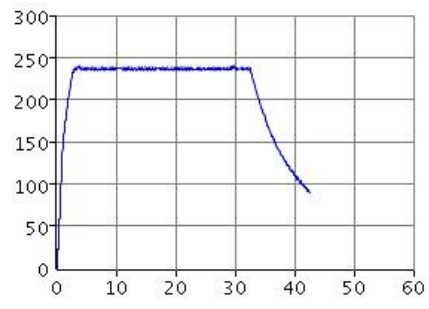

Pressure (bar)Pressure (bar)

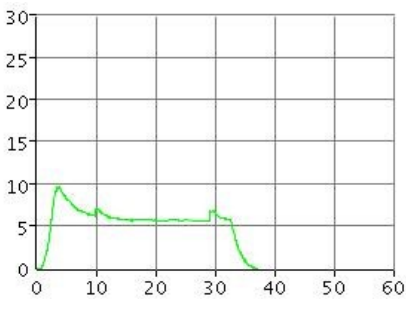

Power (W)Power (W)

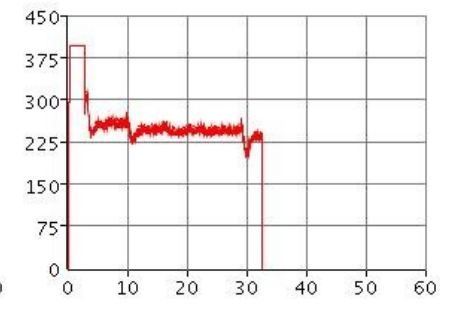

)minTime (Time

## NMR spectra and microwave data of compound 5

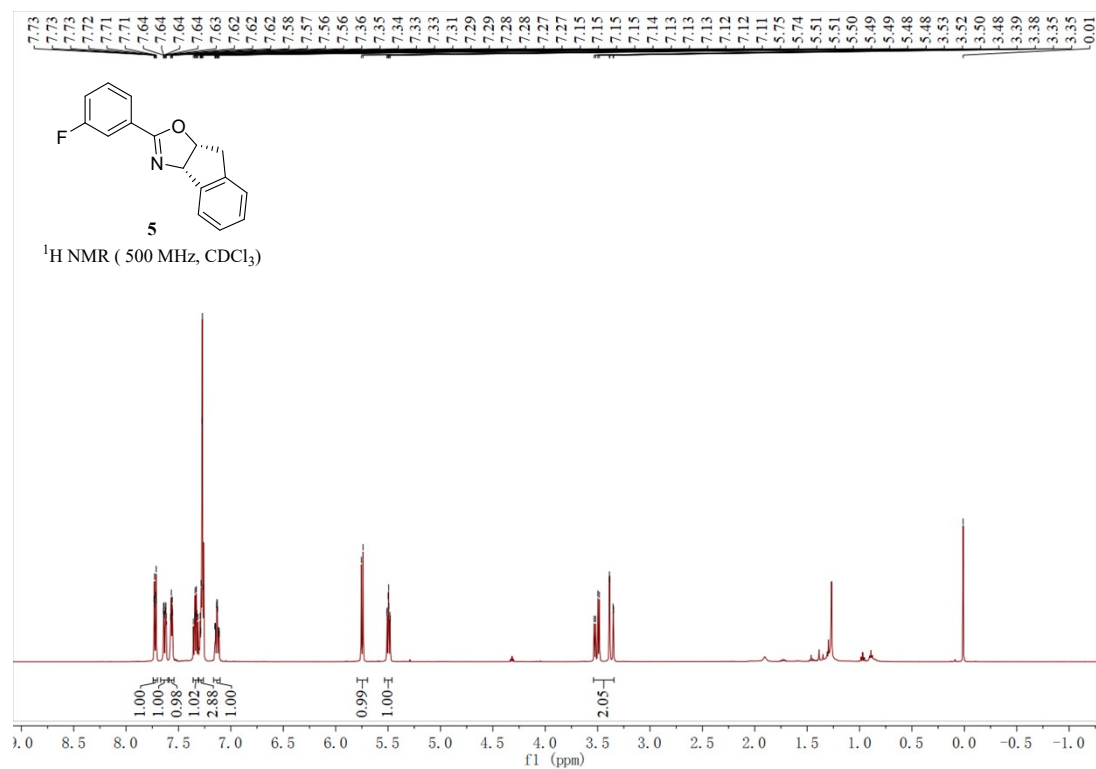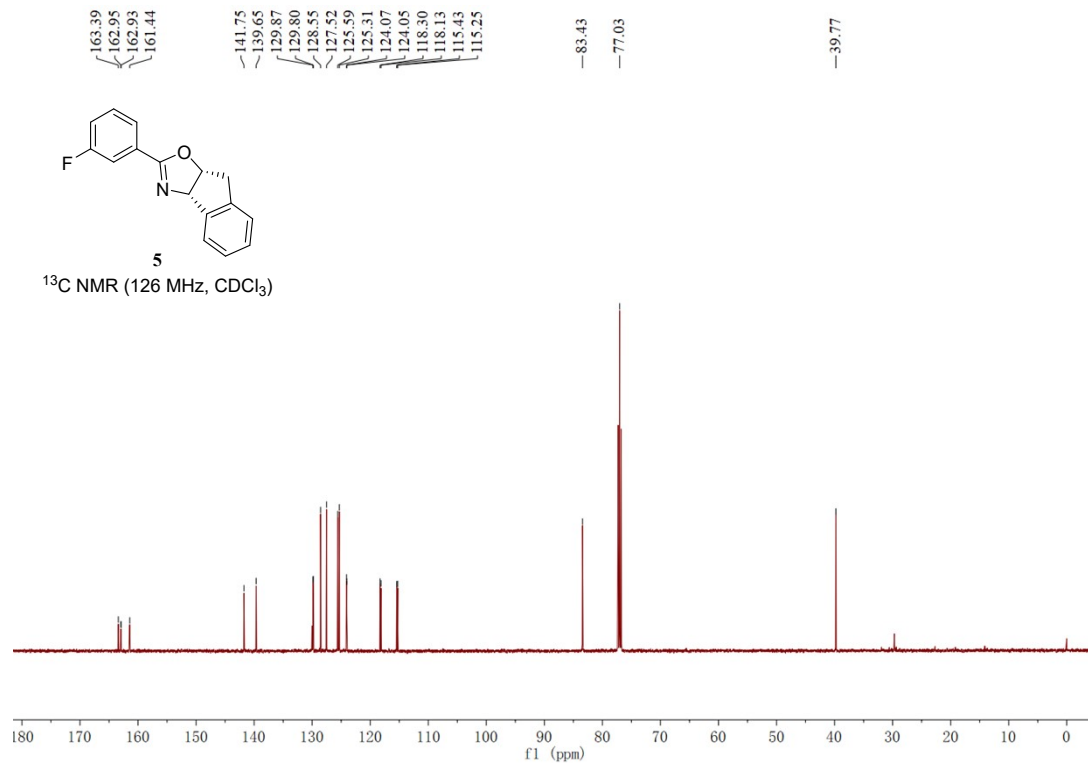

Temperature (°C)

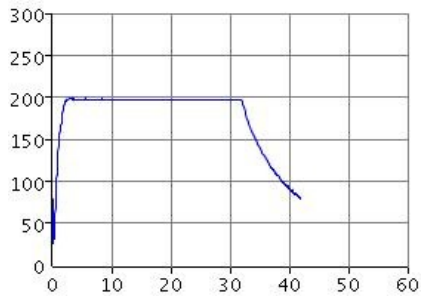

Pressure (bar)

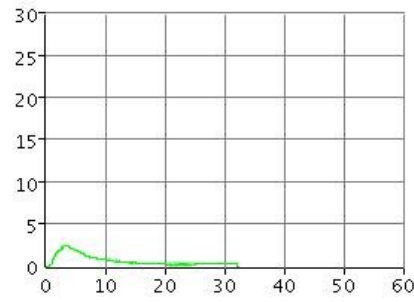

Power (W)

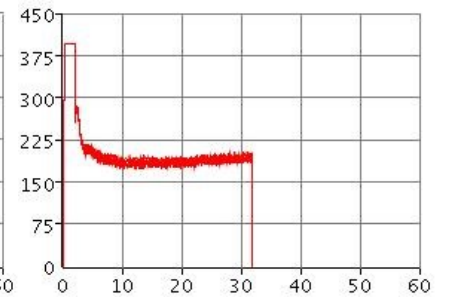

Time (min)

## NMR spectra and microwave data of compound 6

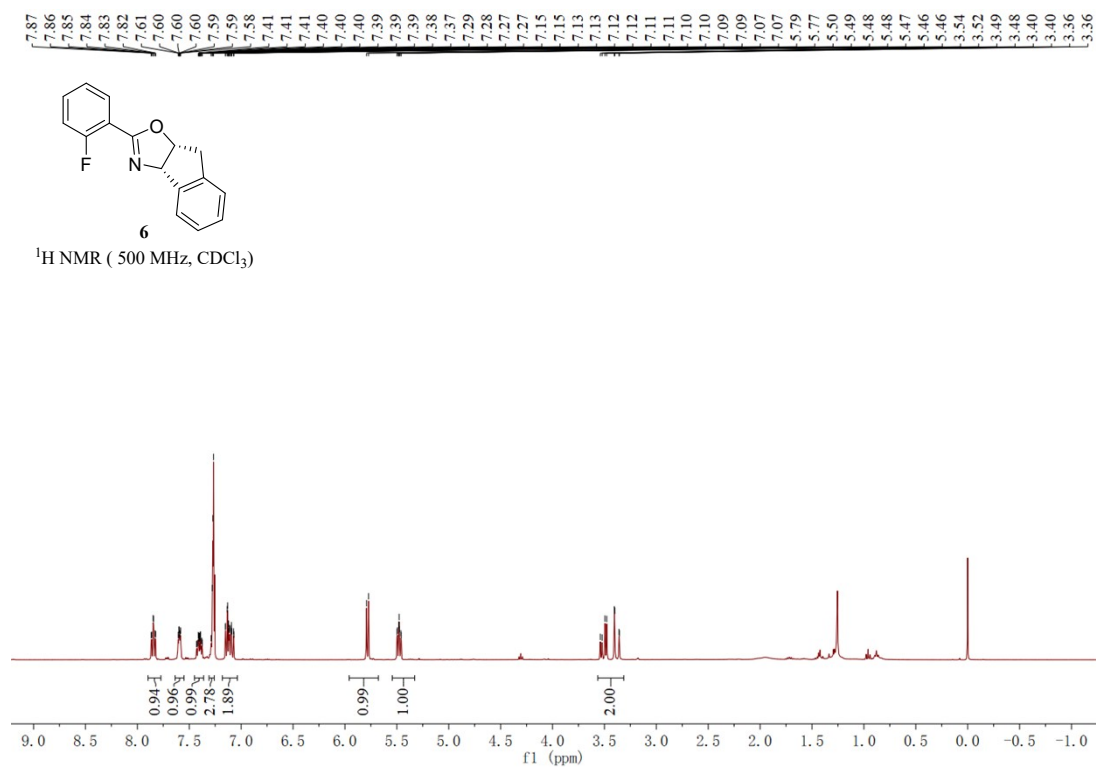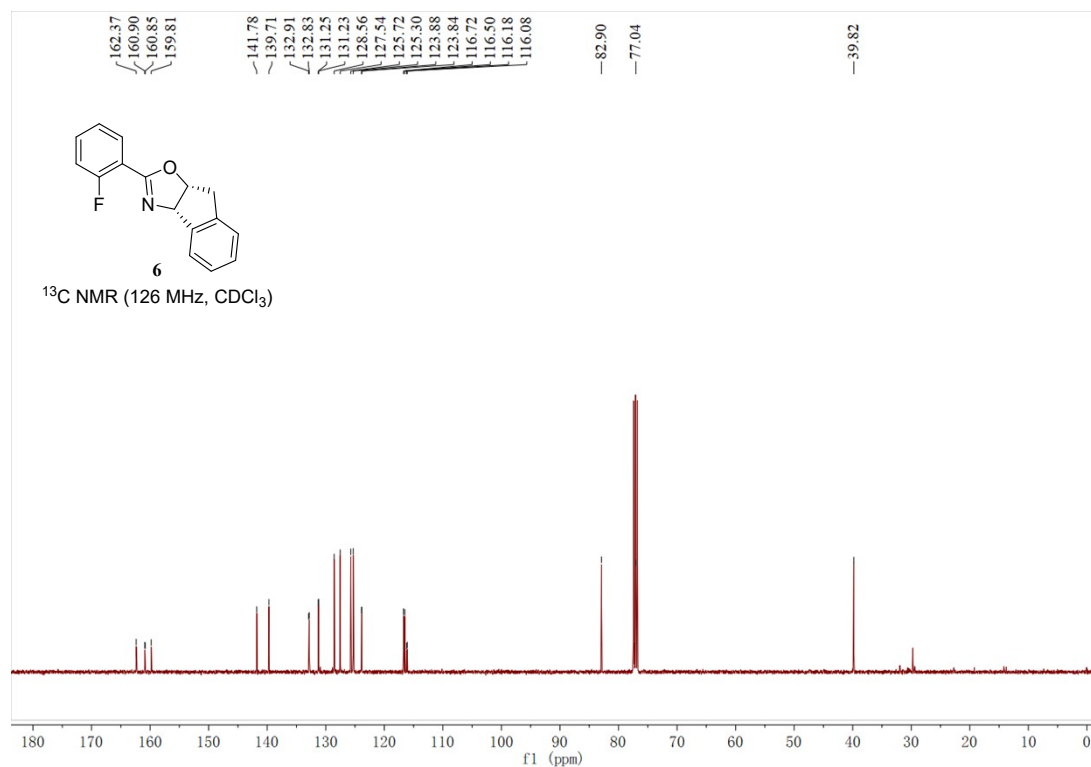

Temperature (°C)

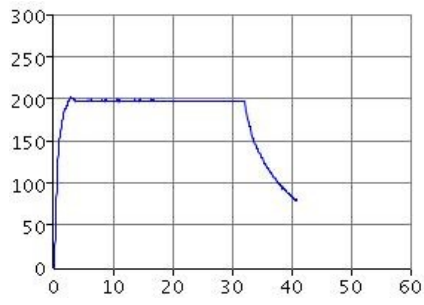

Pressure (bar)

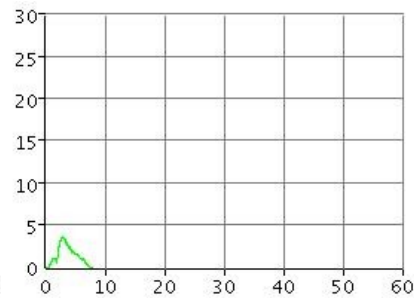

Power (W)

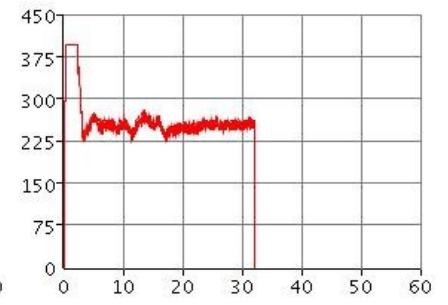

Time (min)

## NMR spectra and microwave data of compound 7

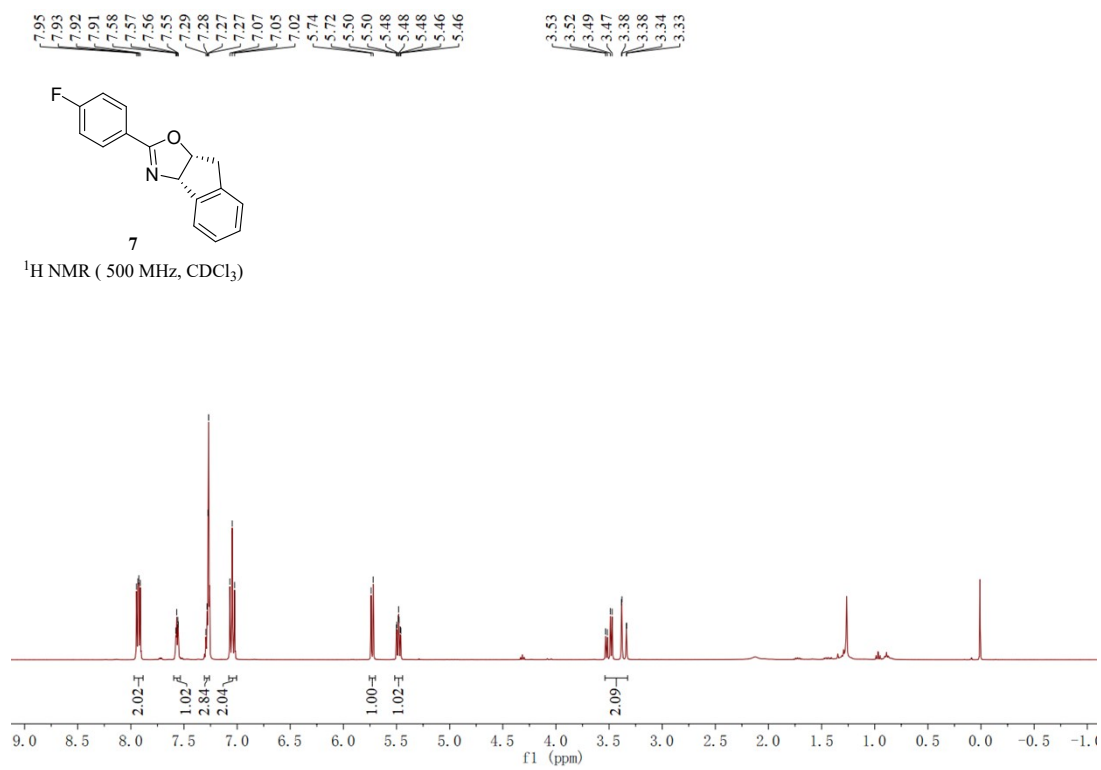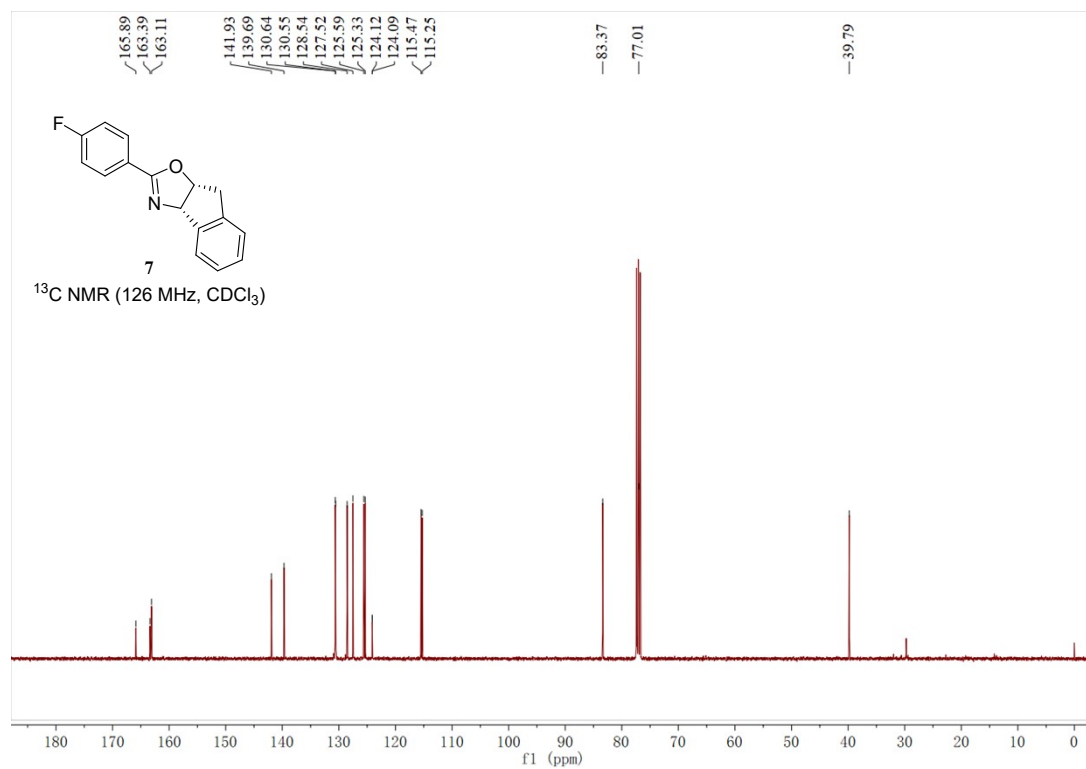

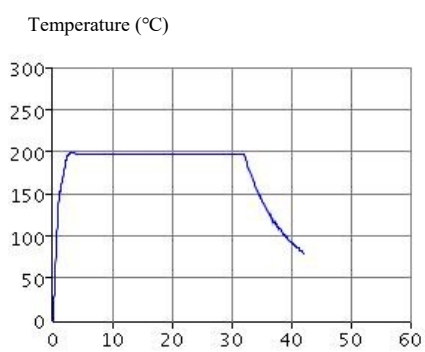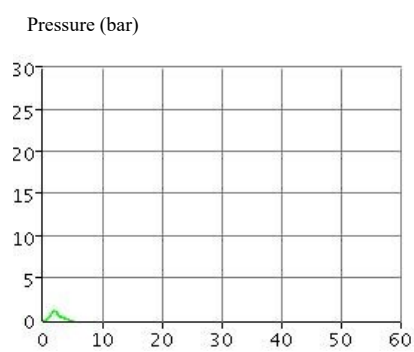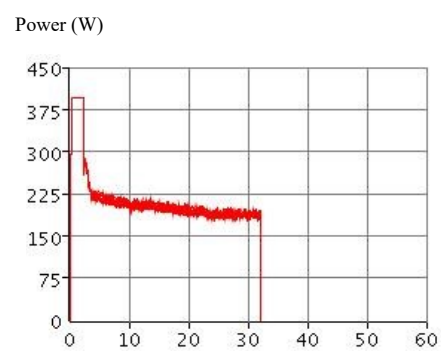

Time (min)



## NMR spectra and microwave data of compound 8

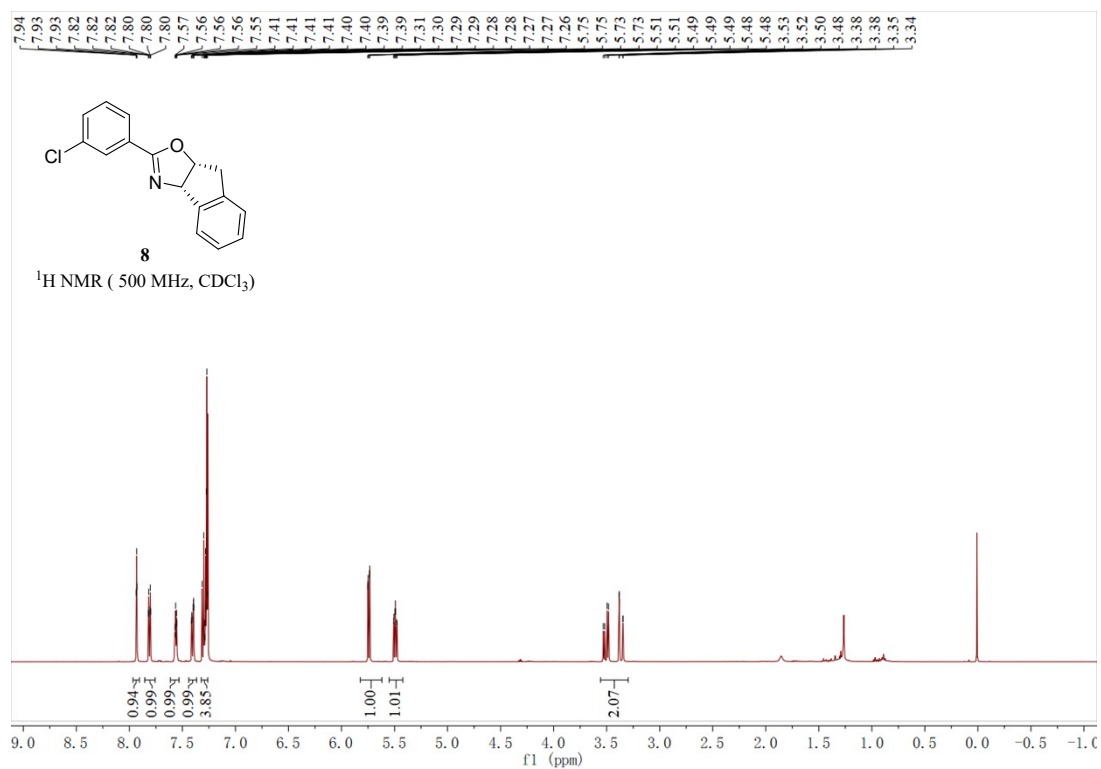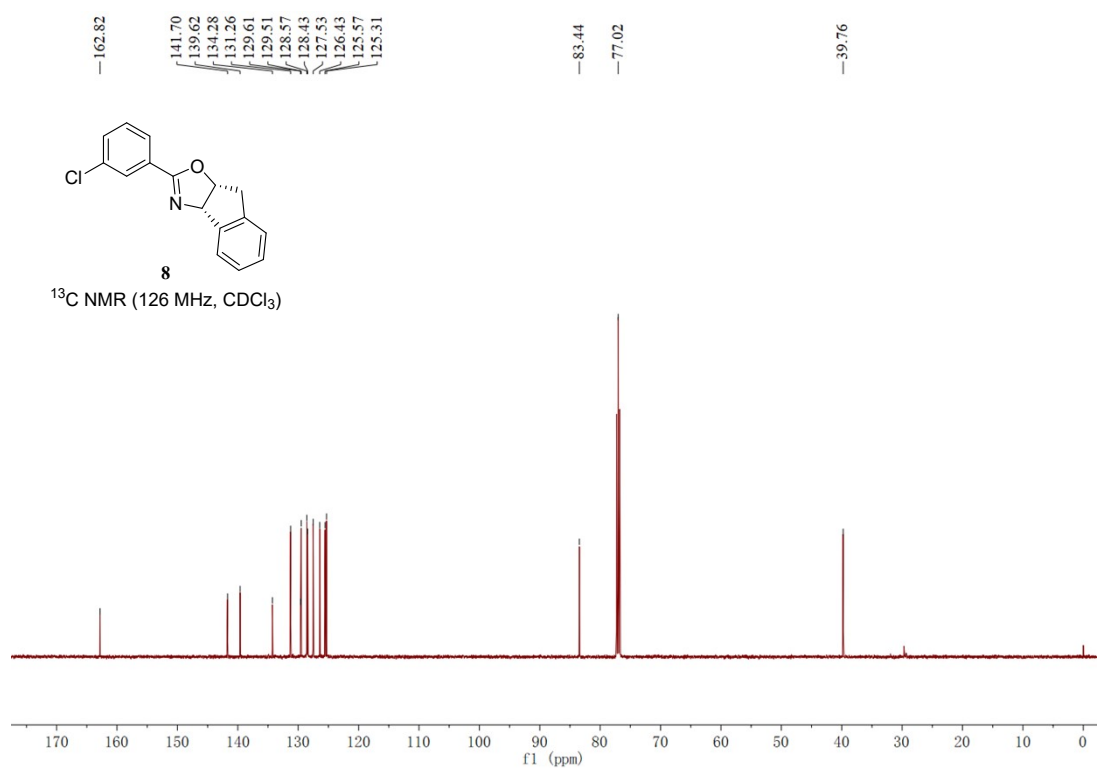

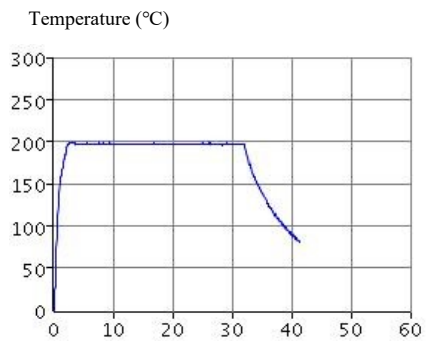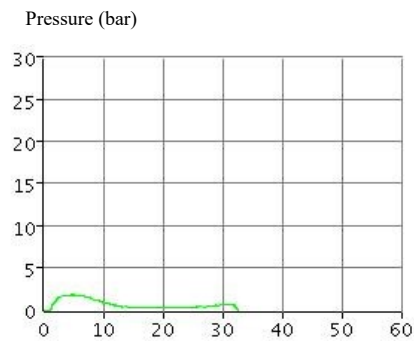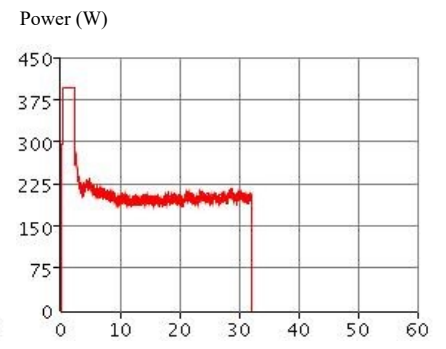

Time (min)

## NMR spectra and microwave data of compound 9

7.87  
7.87  
7.86  
7.86  
7.85  
7.85  
7.57  
7.57  
7.56  
7.55  
7.55  
7.54  
7.54  
7.35  
7.35  
7.34  
7.33  
7.33  
7.30  
7.29  
7.28  
7.28  
7.28  
7.28  
7.27  
7.27  
5.74  
5.74  
5.72  
5.50  
5.50  
5.49  
5.49  
5.48  
5.48  
5.47  
5.47  
3.53  
3.51  
3.49  
3.48  
3.38  
3.38  
3.34  
3.34

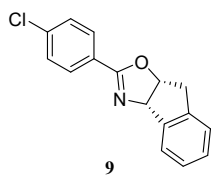

$^1\text{H NMR}$  (500 MHz,  $\text{CDCl}_3$ )

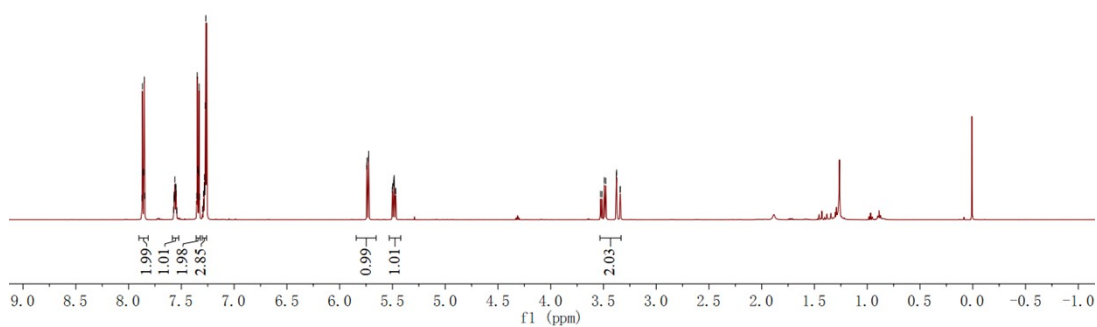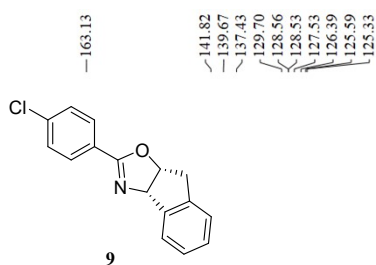

$^{13}\text{C NMR}$  (126 MHz,  $\text{CDCl}_3$ )

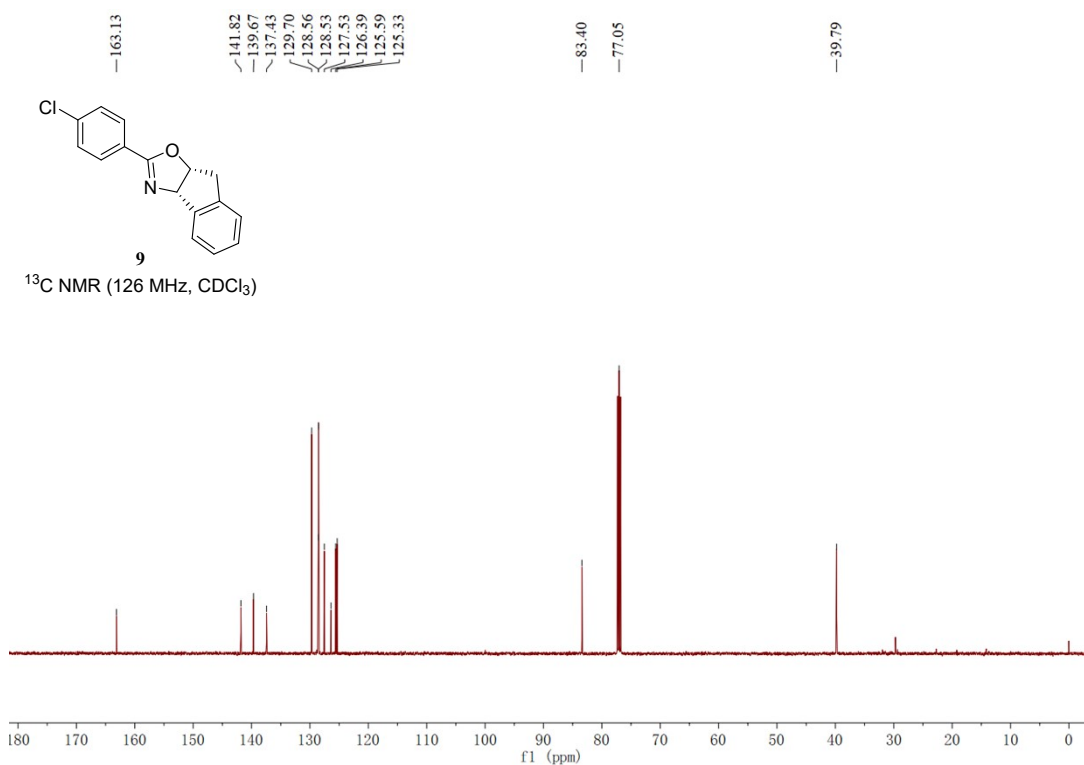

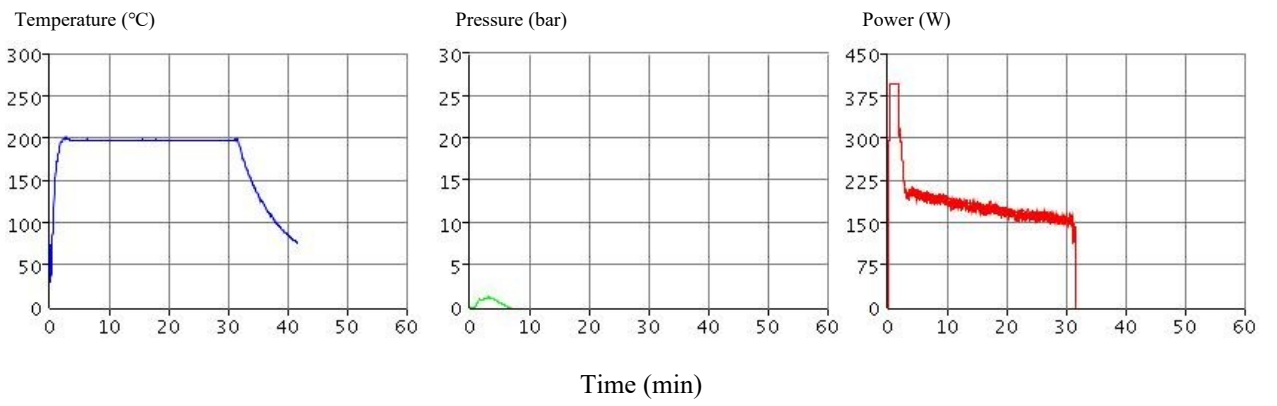

## NMR spectra and microwave data of compound 10

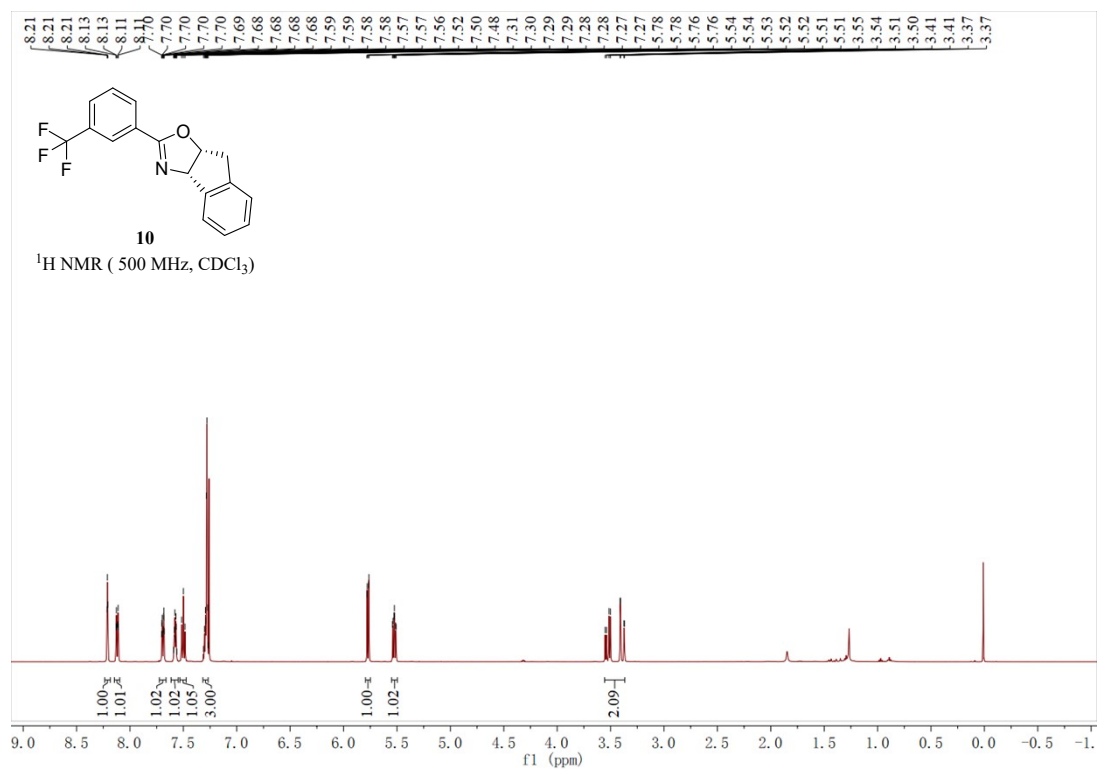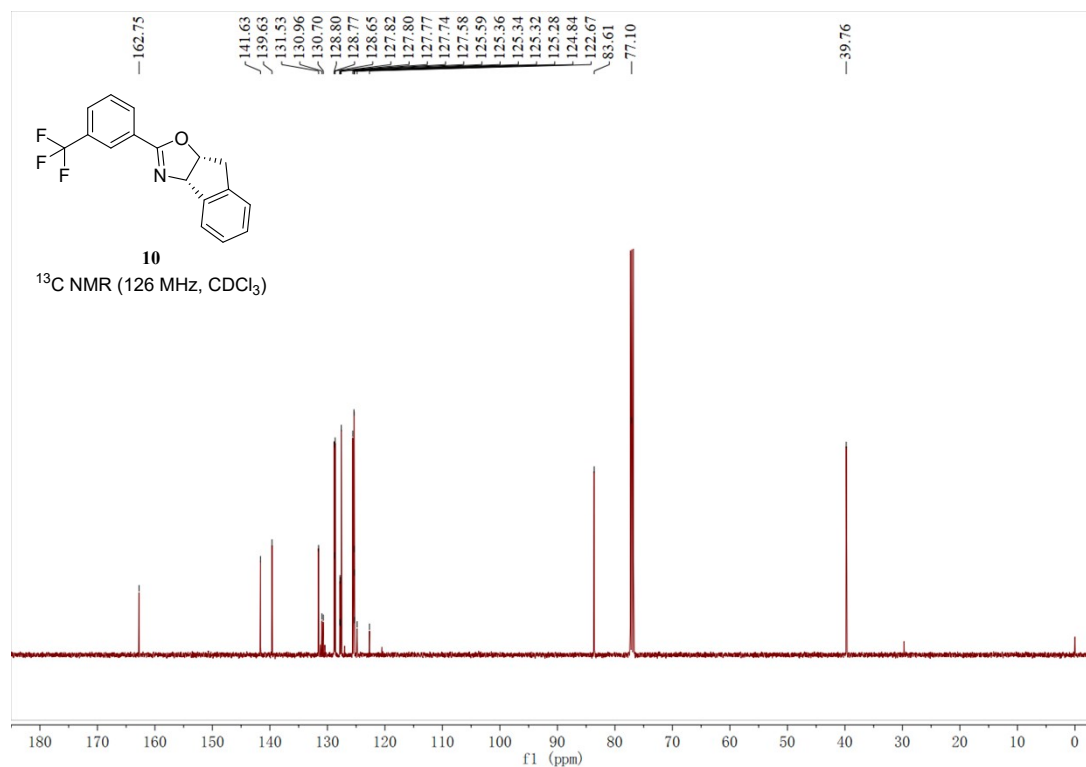

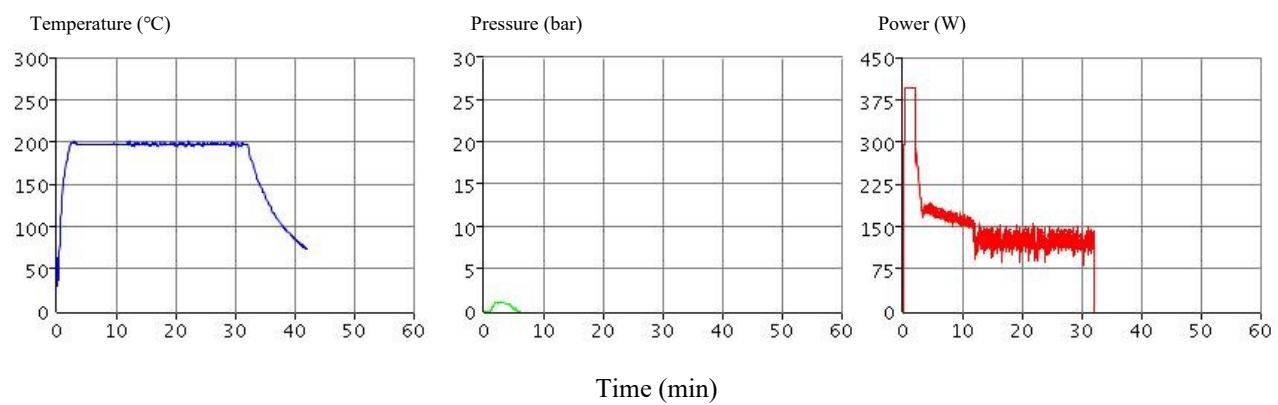

## NMR spectra and microwave data of compound 11

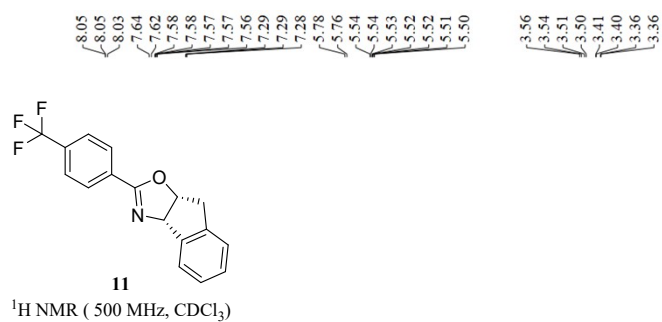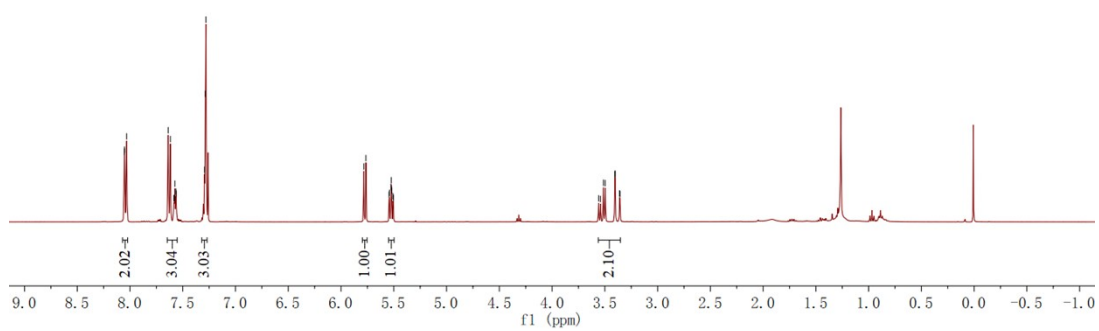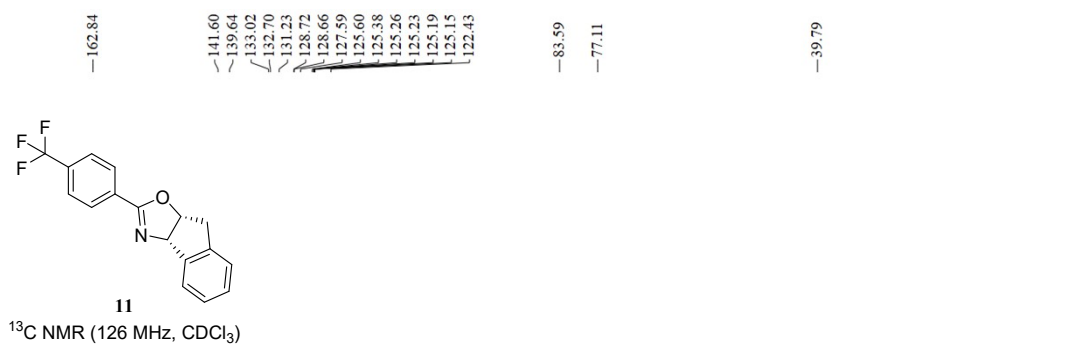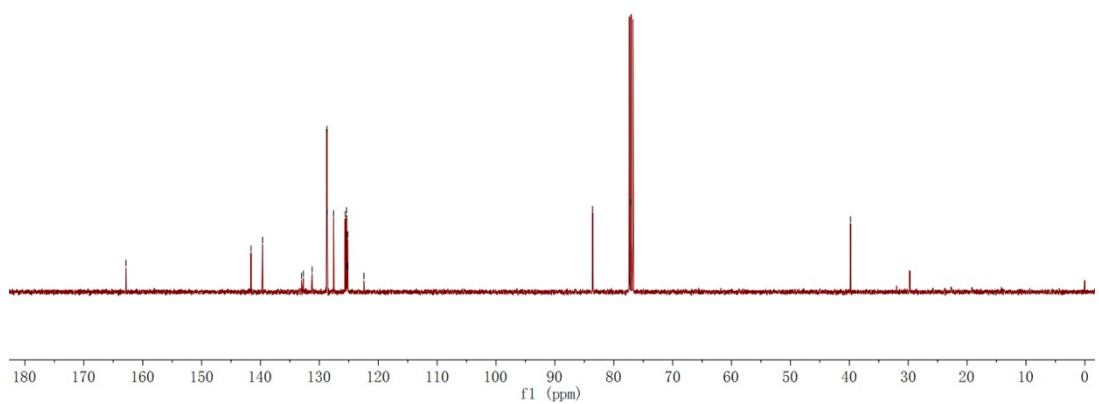

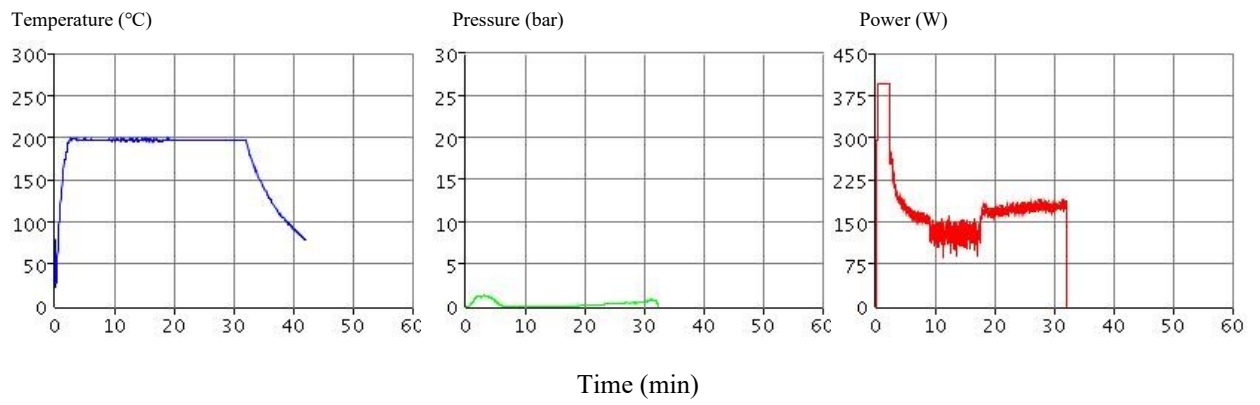



## NMR spectra and microwave data of compound 12

8.10  
8.09  
8.09  
7.87  
7.86  
7.85  
7.85  
7.85  
7.57  
7.56  
7.56  
7.56  
7.56  
7.55  
7.55  
7.54  
7.54  
7.54  
7.29  
7.29  
7.28  
7.28  
7.27  
7.27  
7.25  
7.23  
7.22  
7.22  
5.50  
5.50  
5.49  
5.48  
5.48  
5.47  
5.47  
3.53  
3.51  
3.49  
3.48  
3.38  
3.38  
3.34  
3.34

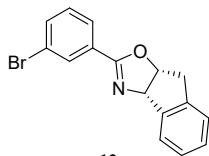

**12**

$^1\text{H NMR}$  (500 MHz,  $\text{CDCl}_3$ )

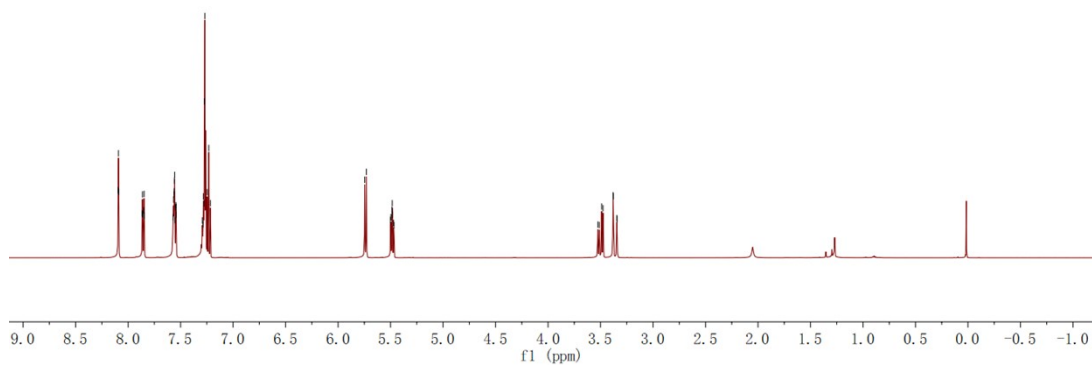

162.72  
141.71  
139.64  
134.21  
131.34  
129.84  
129.80  
128.61  
127.56  
126.90  
125.59  
125.35  
122.31

83.48  
77.03

39.79

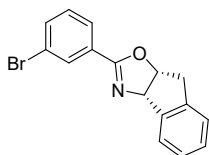

**12**

$^{13}\text{C NMR}$  (126 MHz,  $\text{CDCl}_3$ )

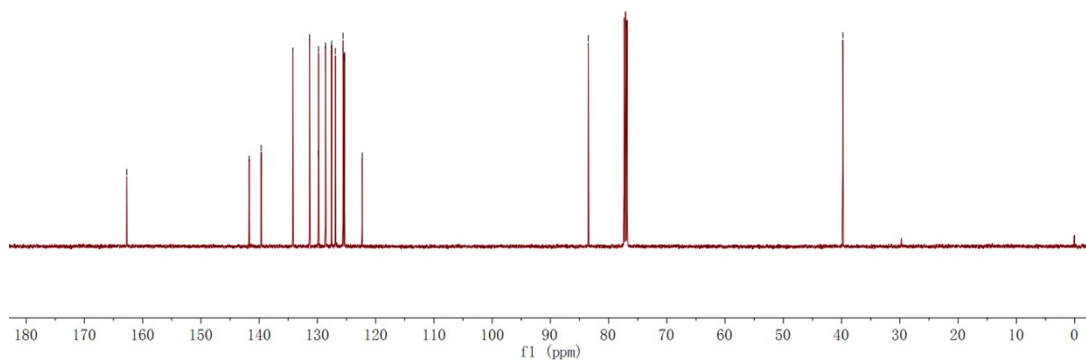

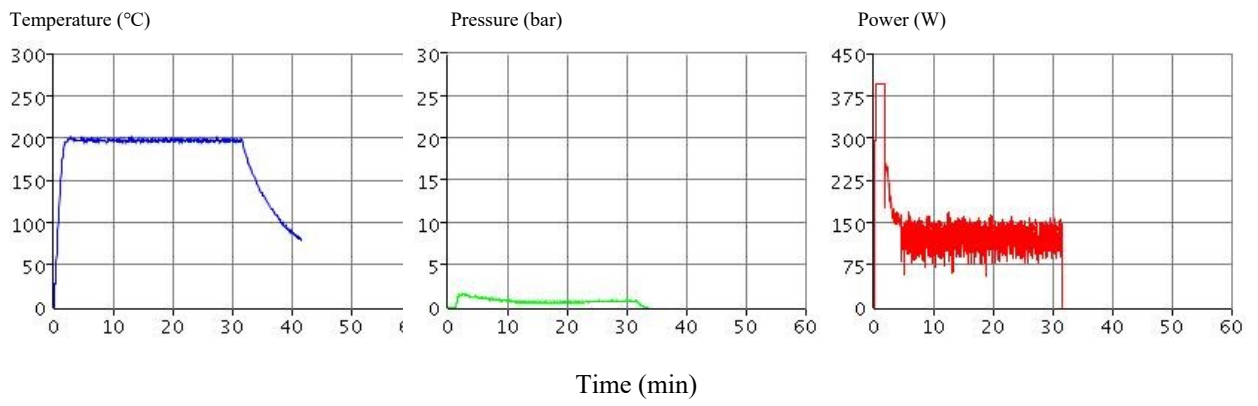

## NMR spectra and microwave data of compound 13

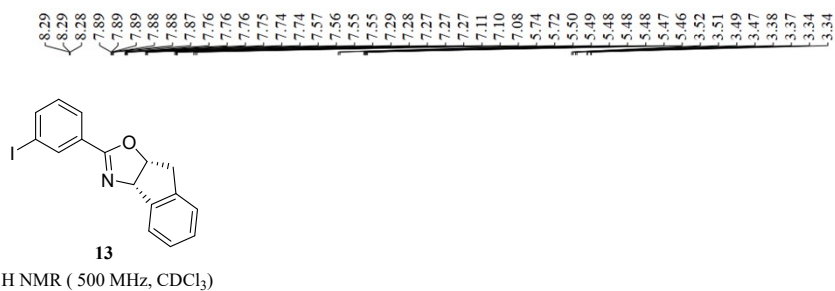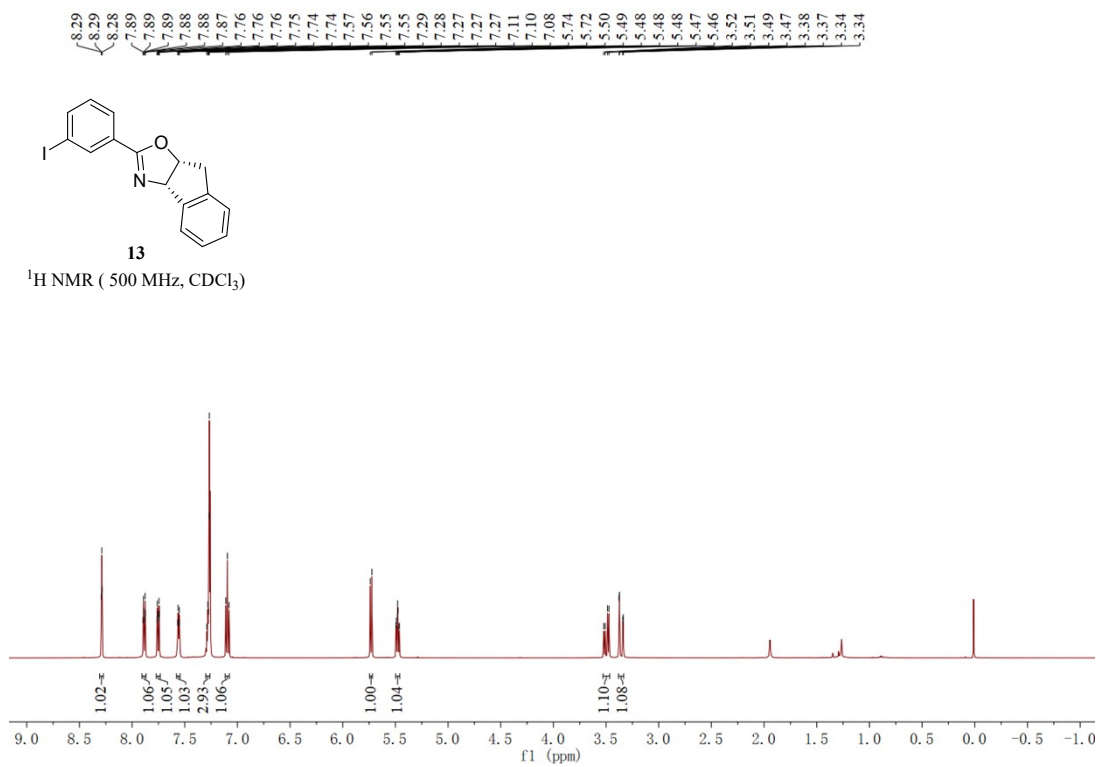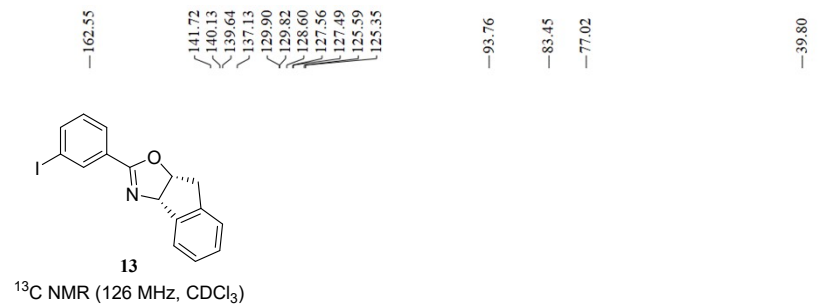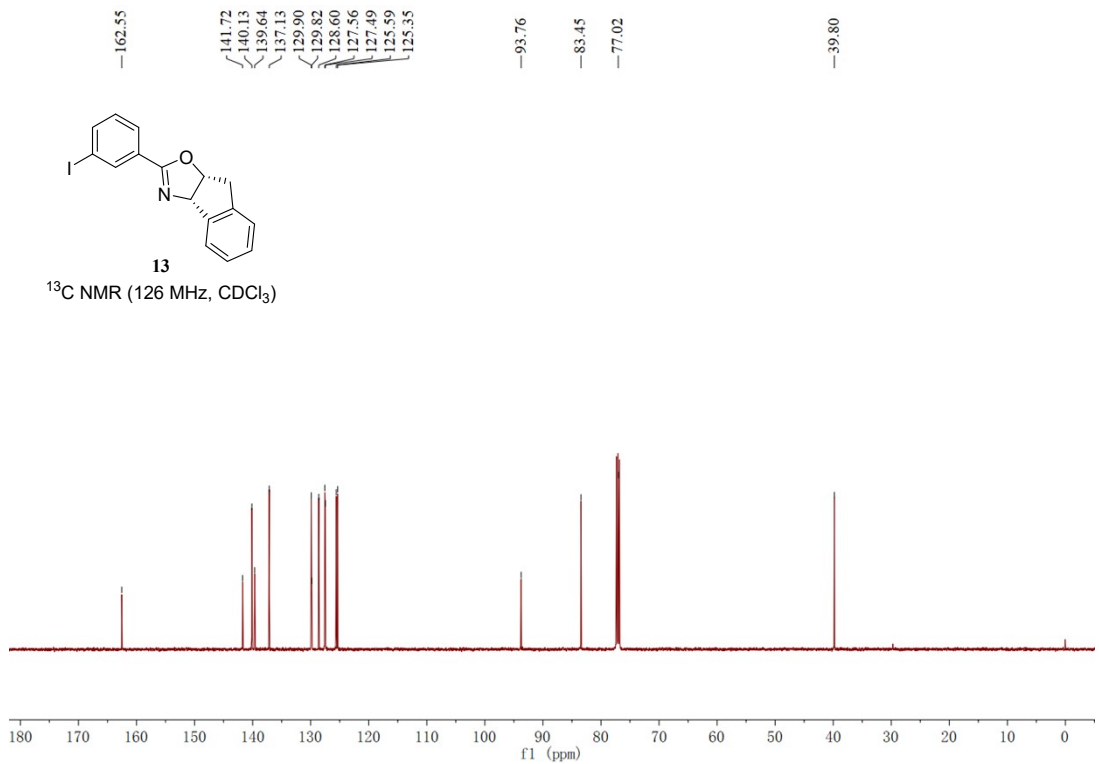

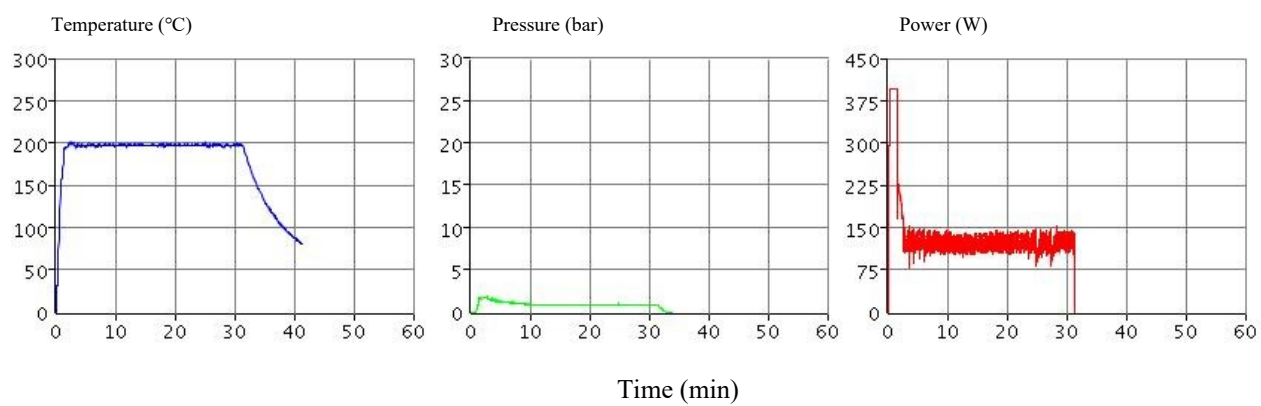

## NMR spectra and microwave data of compound 14

7.55  
7.55  
7.54  
7.53  
7.53  
7.47  
7.46  
7.46  
7.45  
7.45  
7.44  
7.44  
7.44  
7.44  
7.43  
7.43  
7.29  
7.29  
7.28  
7.28  
7.27  
7.26  
7.25  
7.25  
7.25  
6.89  
6.88  
6.88  
6.87  
6.86  
6.86  
6.85  
6.85  
6.84  
5.74  
5.73  
5.50  
5.50  
5.49  
5.49  
5.48  
5.48  
5.47  
5.47  
3.52  
3.51  
3.48  
3.47  
3.37  
3.36  
3.33  
3.33

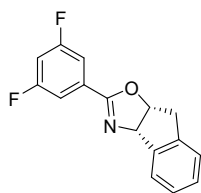

**14**

$^1\text{H NMR}$  (500 MHz,  $\text{CDCl}_3$ )

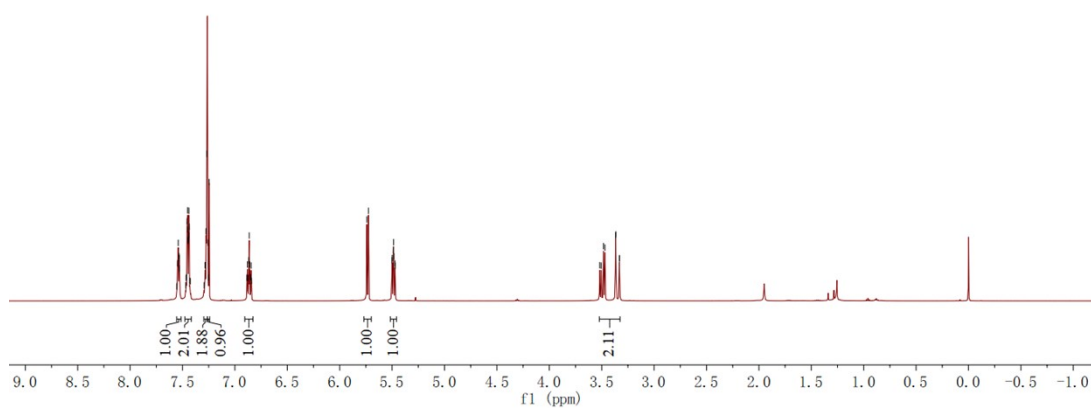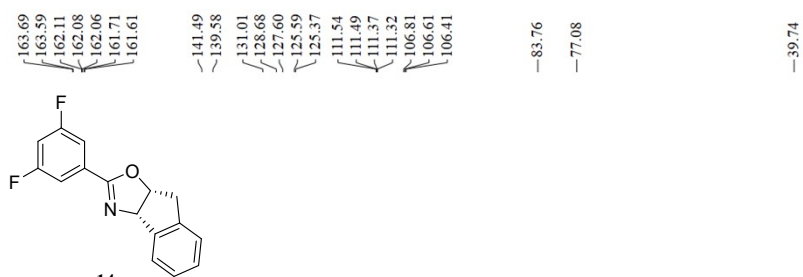

**14**

$^{13}\text{C NMR}$  (126 MHz,  $\text{CDCl}_3$ )

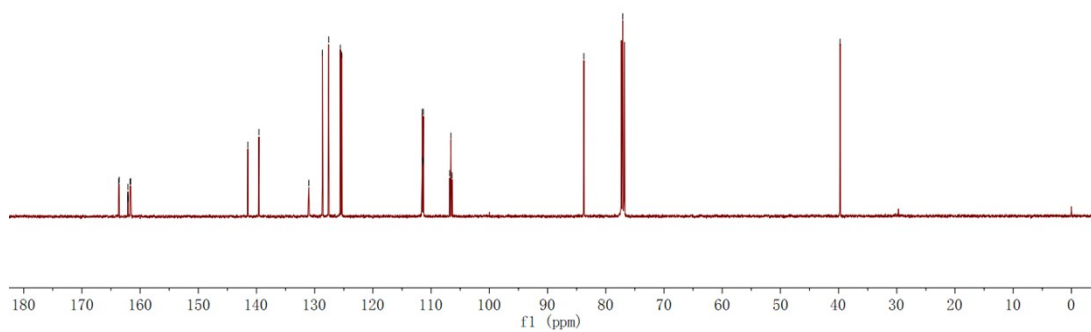

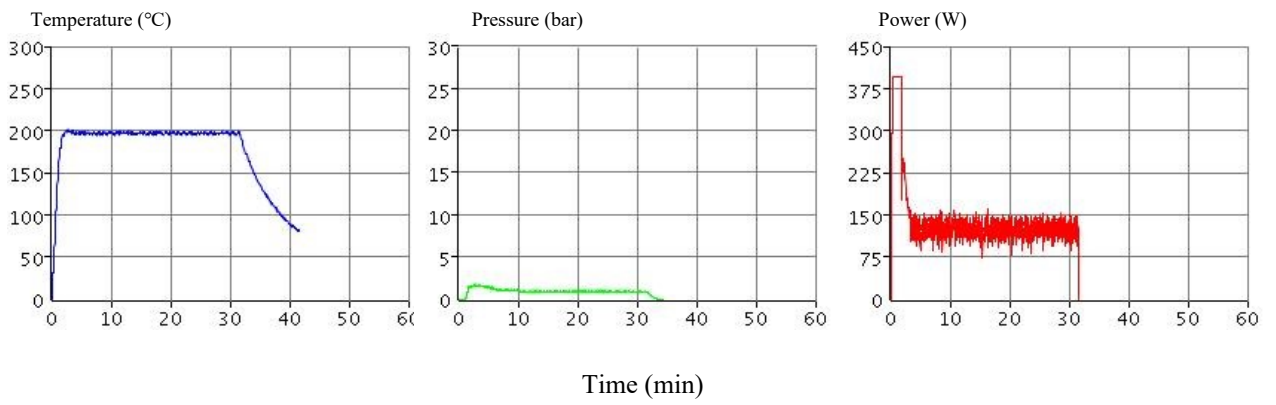

## NMR spectra and microwave data of compound 15

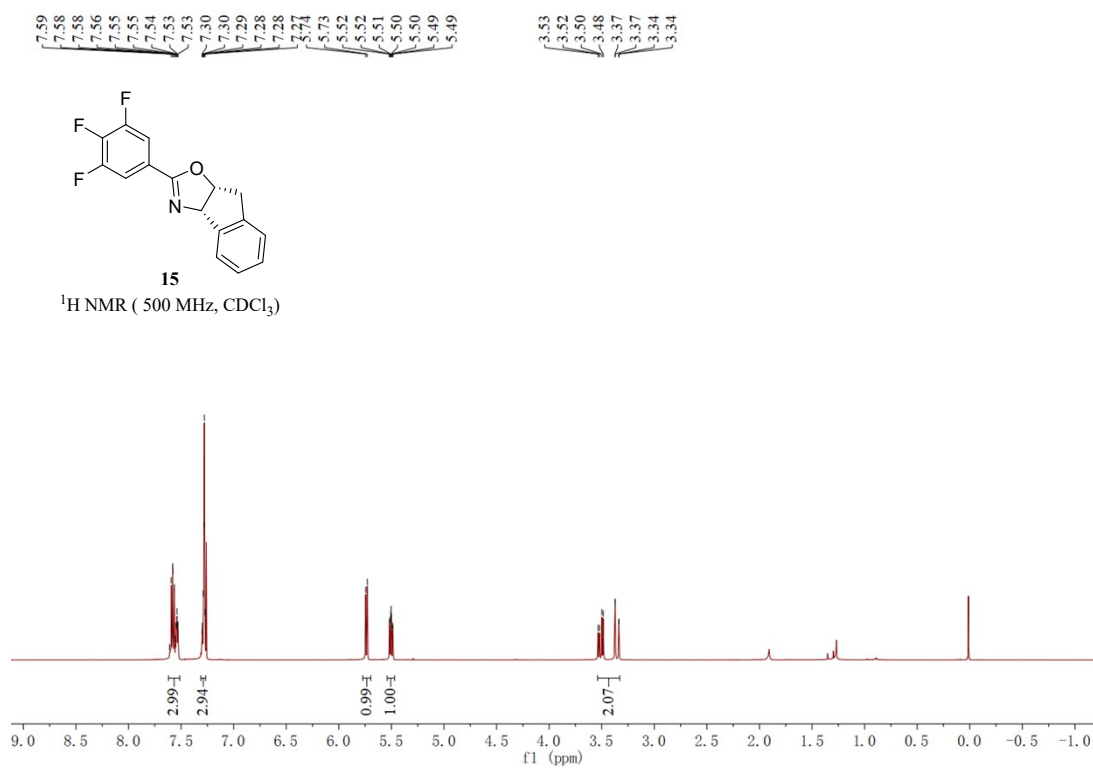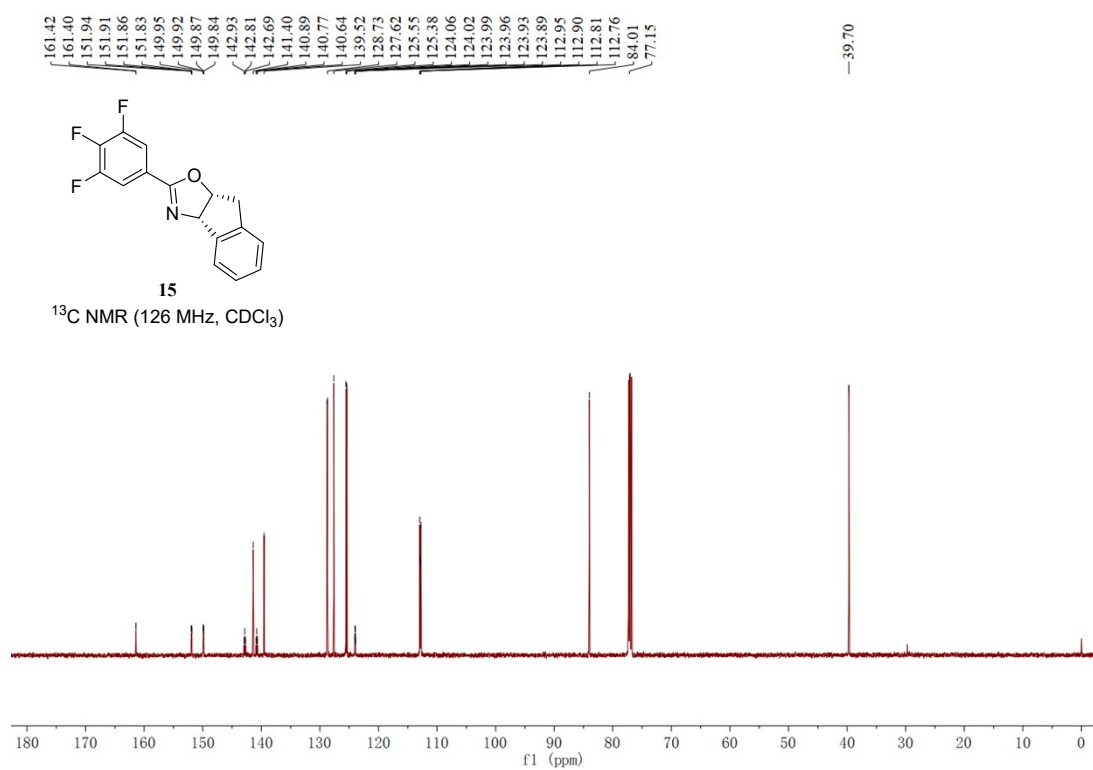

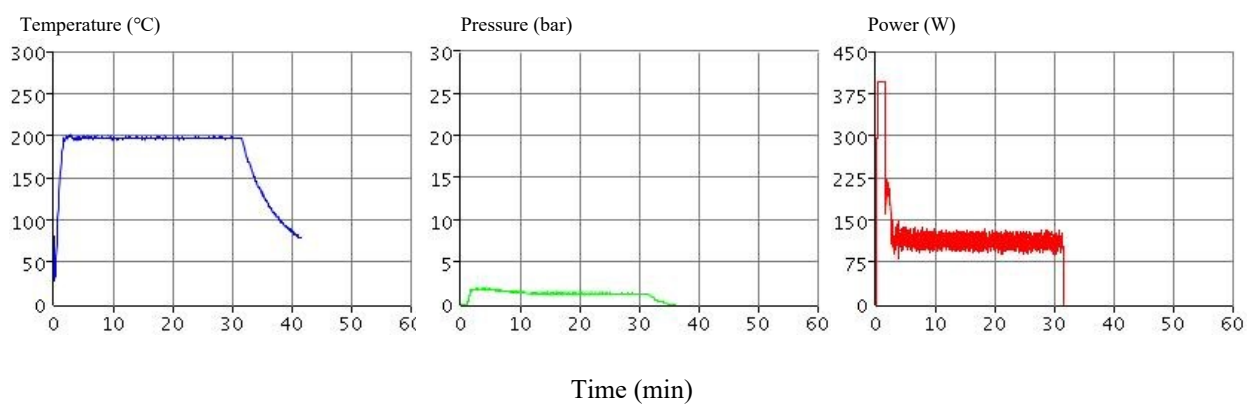



## NMR spectra and microwave data of compound 16

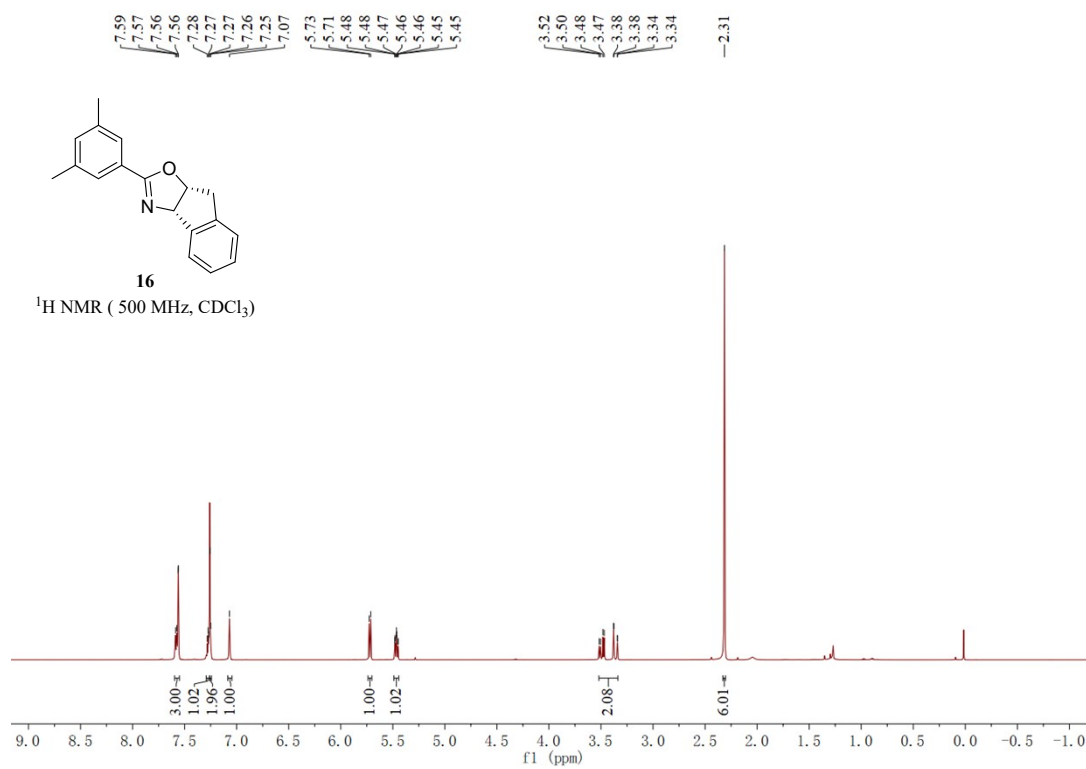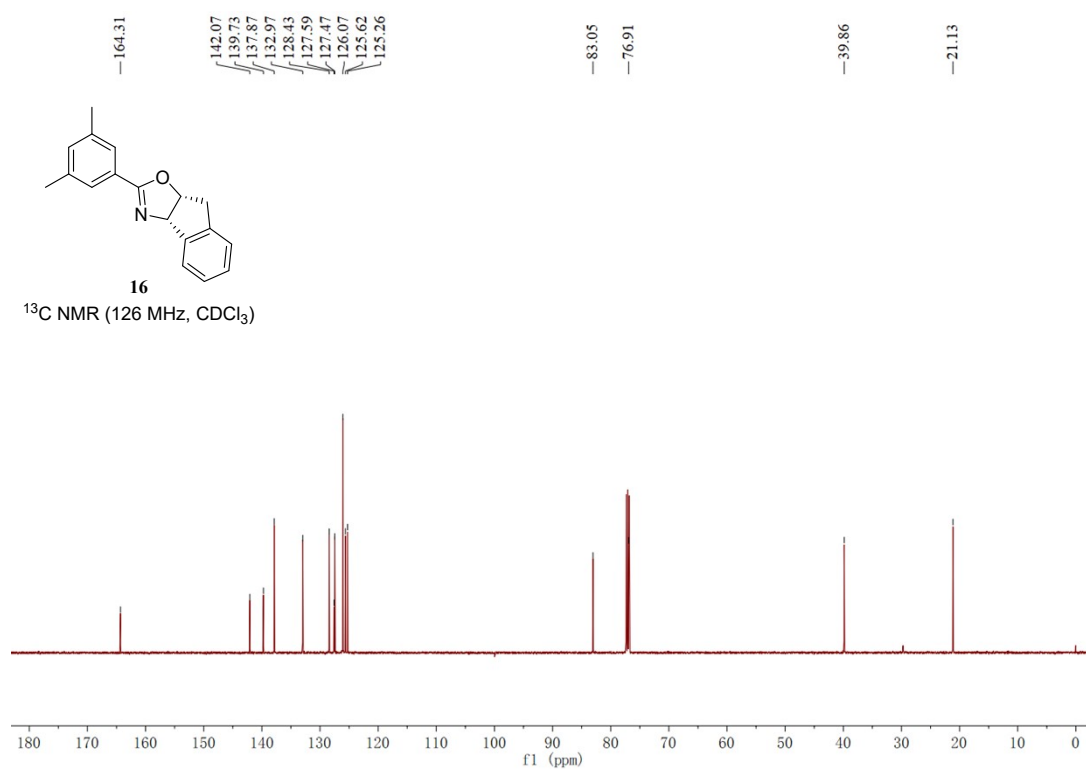

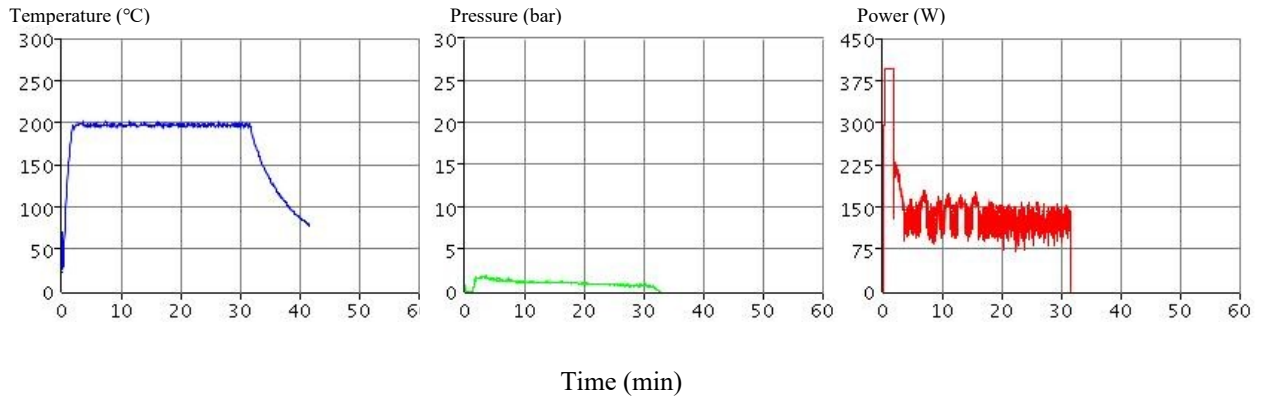

## NMR spectra and microwave data of compound 17

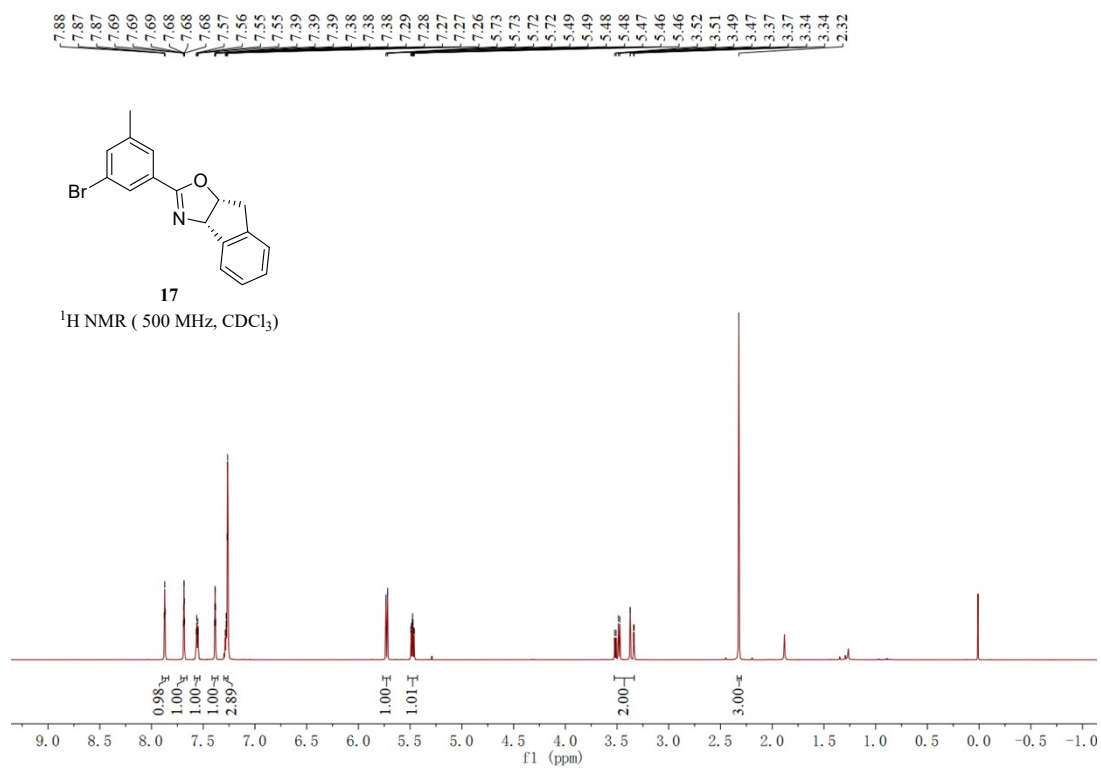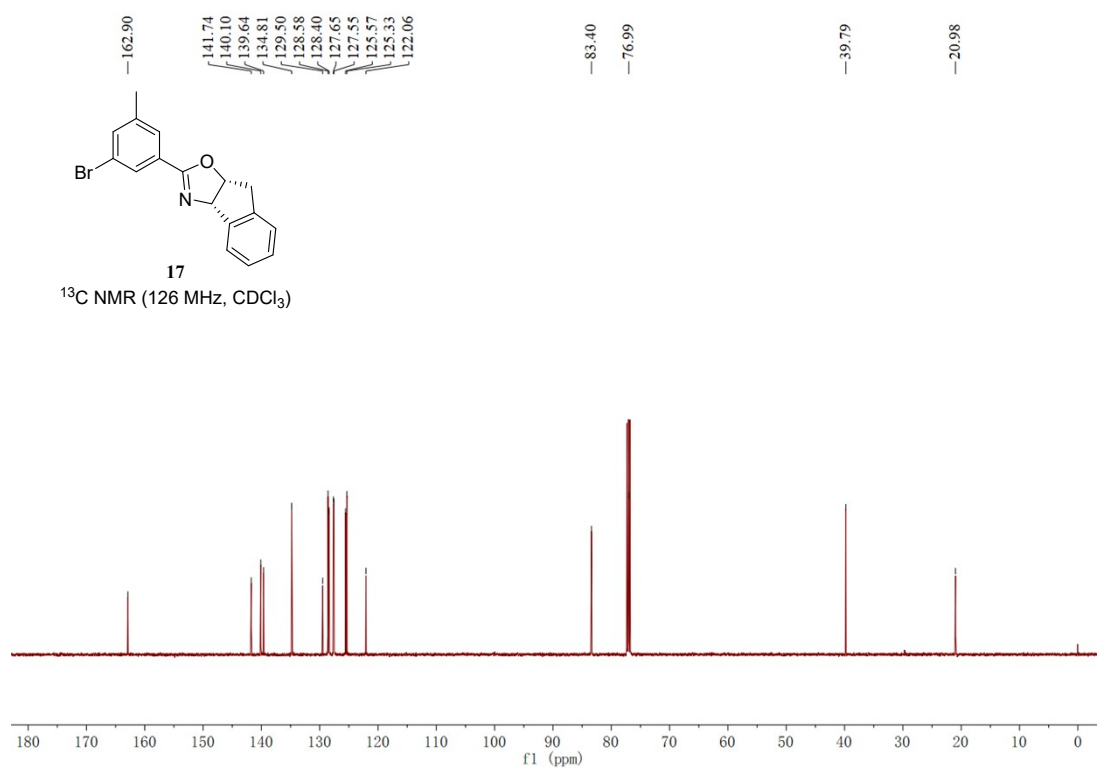

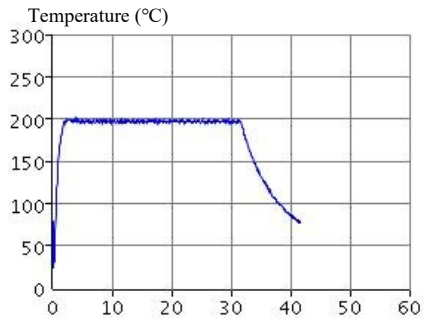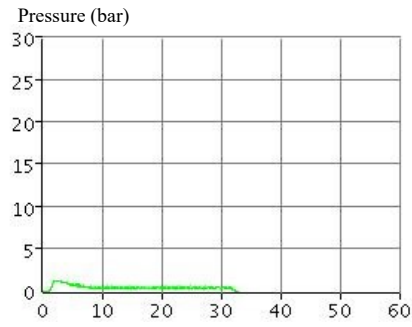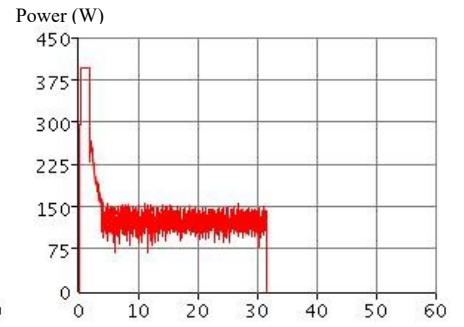

Time (min)

## NMR spectra and microwave data of compound 18

8.52, 8.51, 8.44, 7.64, 7.63, 7.62, 7.51, 7.51, 7.49, 7.49, 7.32, 7.31, 7.23, 7.21, 6.90, 6.88, 5.13, 5.12, 5.12, 5.11, 4.80, 4.79, 4.78, 3.31, 3.30, 3.28, 3.27, 3.09, 3.06

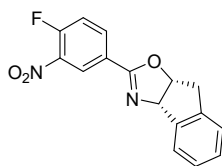

**18**

$^1\text{H NMR}$  (500 MHz,  $\text{CDCl}_3$ )

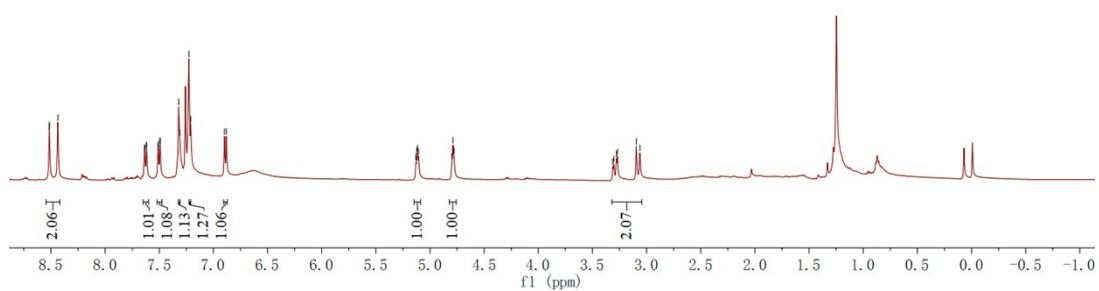

148.33, 147.02, 141.13, 140.89, 137.93, 136.59, 132.08, 131.62, 130.77, 129.76, 127.89, 126.63, 125.33, 123.60, 120.24, 118.32, 118.19, 116.60, 96.82, 96.50, 71.93, 59.68, 39.78

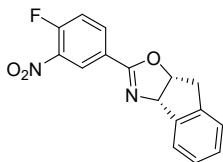

**18**

$^{13}\text{C NMR}$  (101 MHz,  $\text{DMSO-d}_6$ )

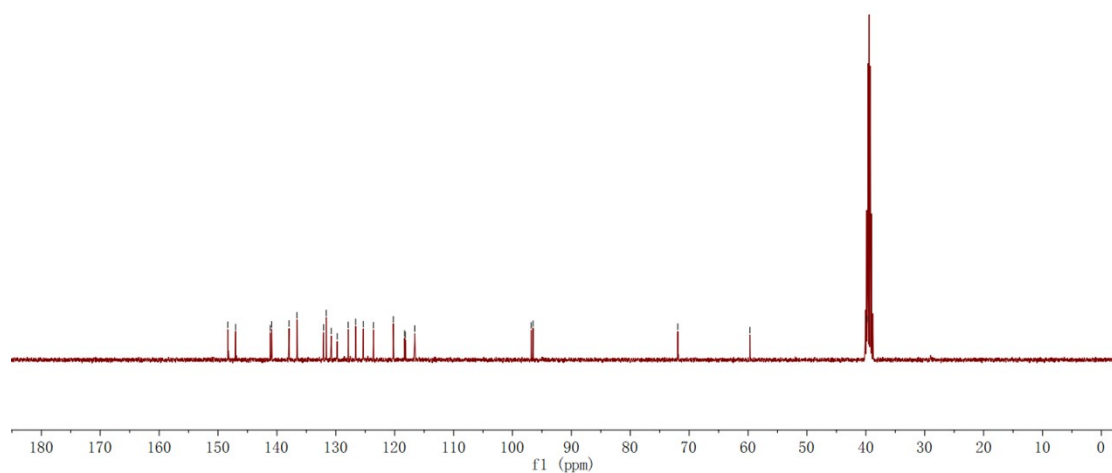

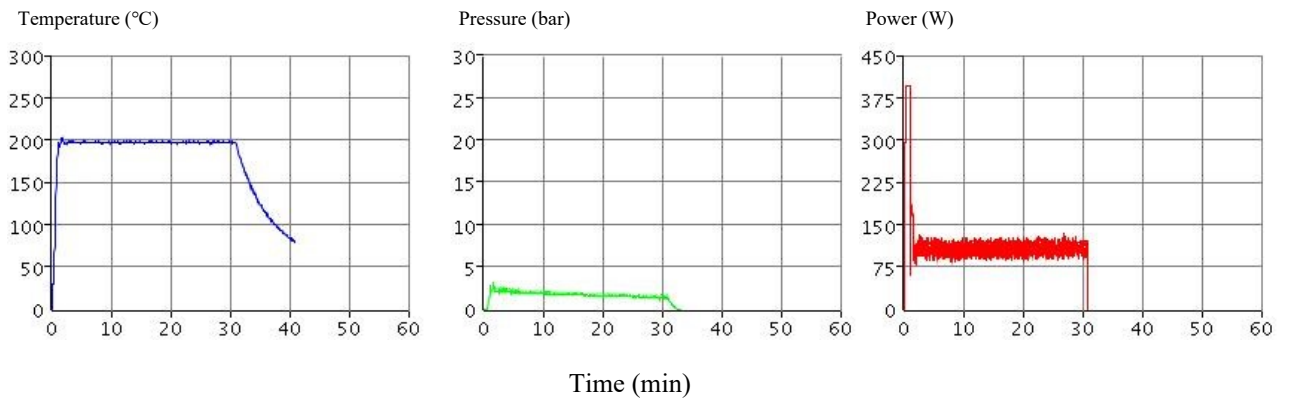

## NMR spectra and microwave data of compound 19

8.48  
8.47  
8.47  
8.13  
8.13  
8.13  
8.12  
8.11  
8.04  
8.04  
8.04  
8.03  
8.02  
8.02  
7.58  
7.58  
7.57  
7.56  
7.49  
7.47  
7.46  
7.29  
7.28  
7.27  
7.27  
5.77  
5.77  
5.75  
5.53  
5.53  
5.52  
5.52  
5.51  
5.50  
5.50  
3.54  
3.53  
3.51  
3.49  
3.41  
3.40  
3.37  
3.37  
2.62

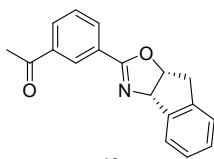

**19**

$^1\text{H NMR}$  (500 MHz,  $\text{CDCl}_3$ )

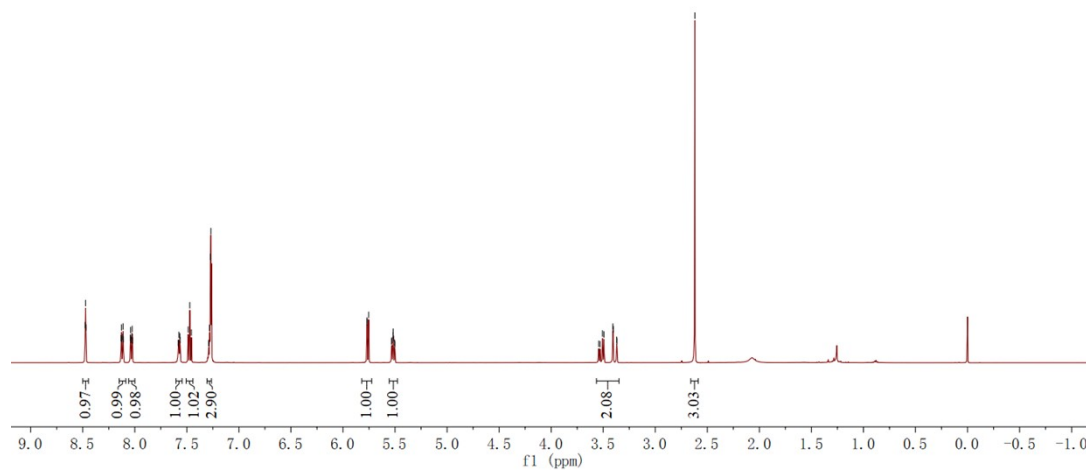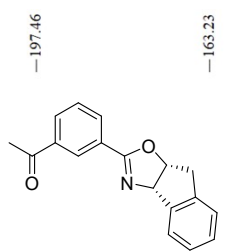

**19**

$^{13}\text{C NMR}$  (126 MHz,  $\text{CDCl}_3$ )

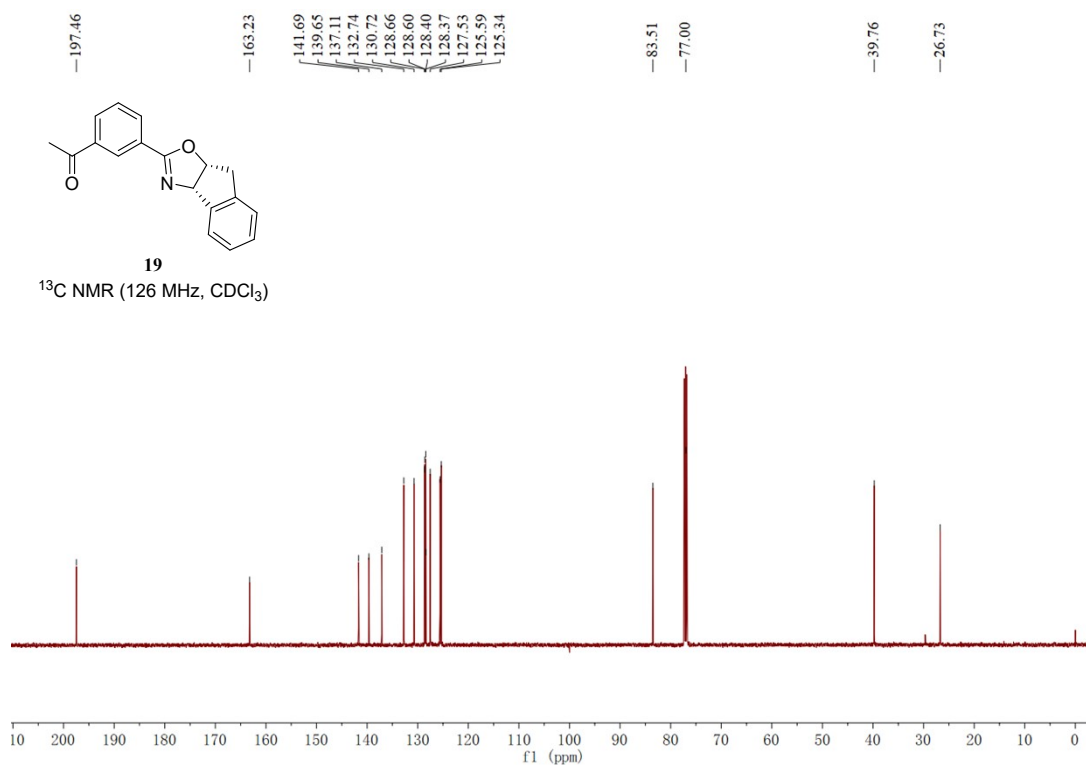

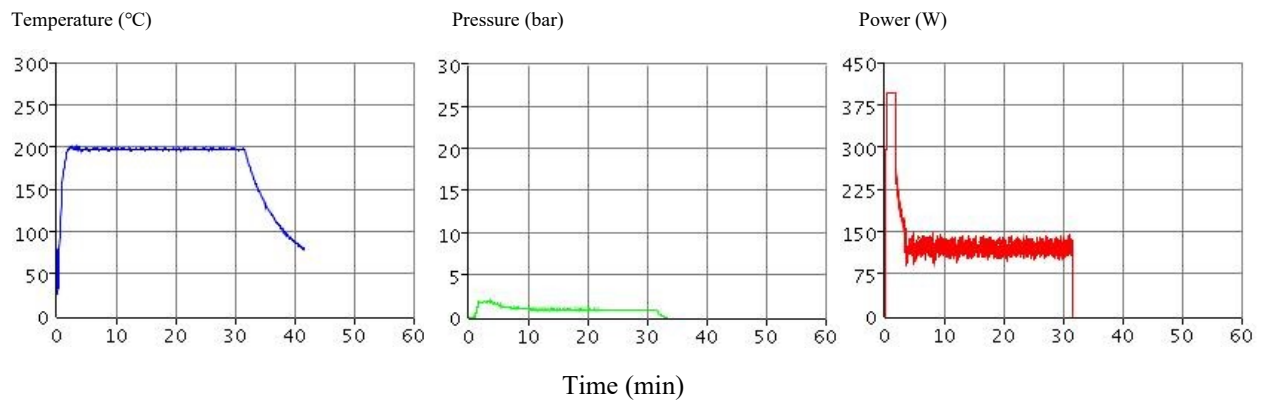



## NMR spectra and microwave data of compound 20

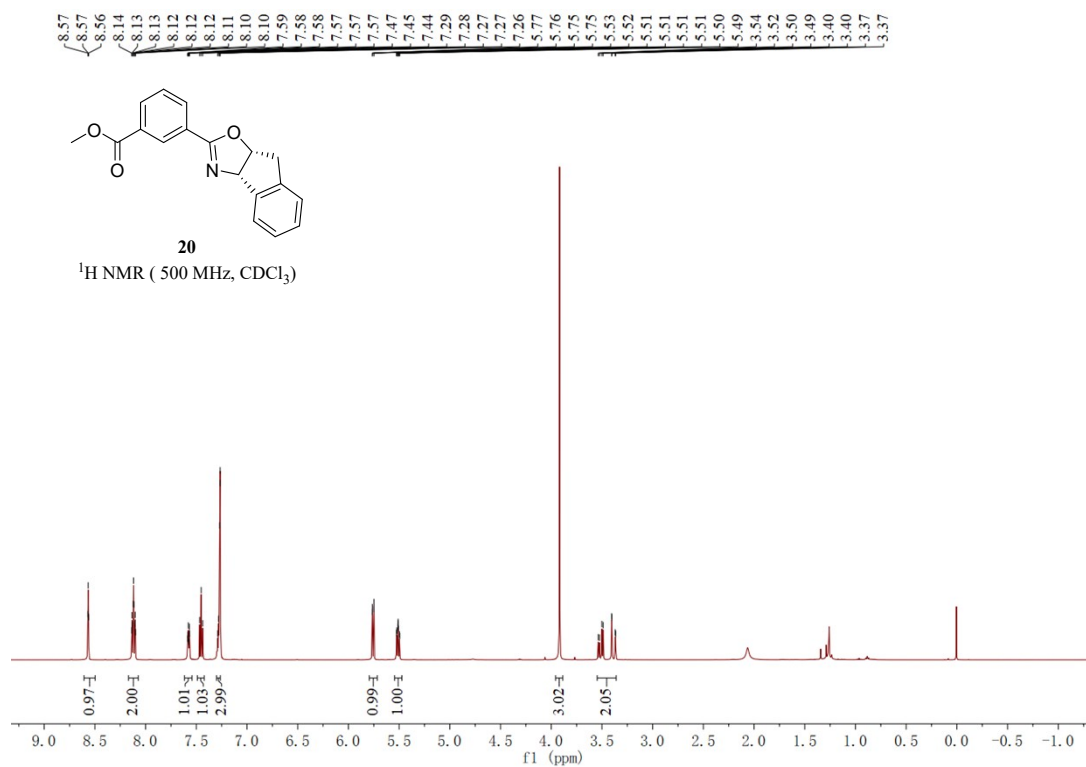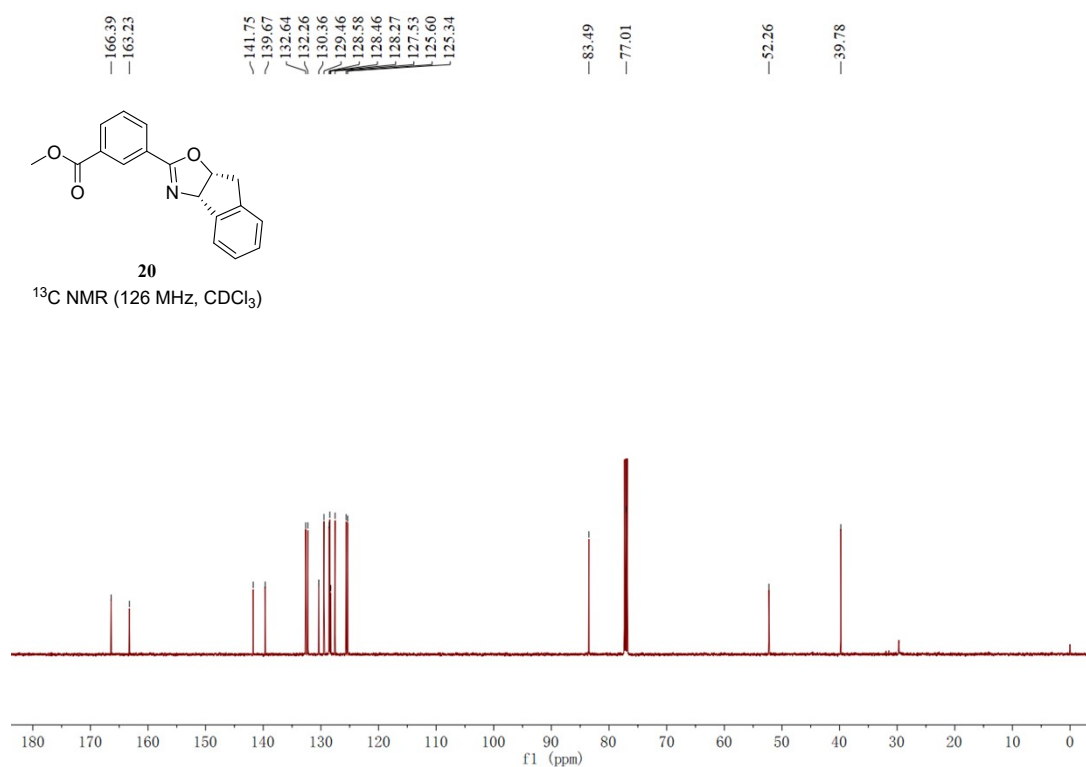

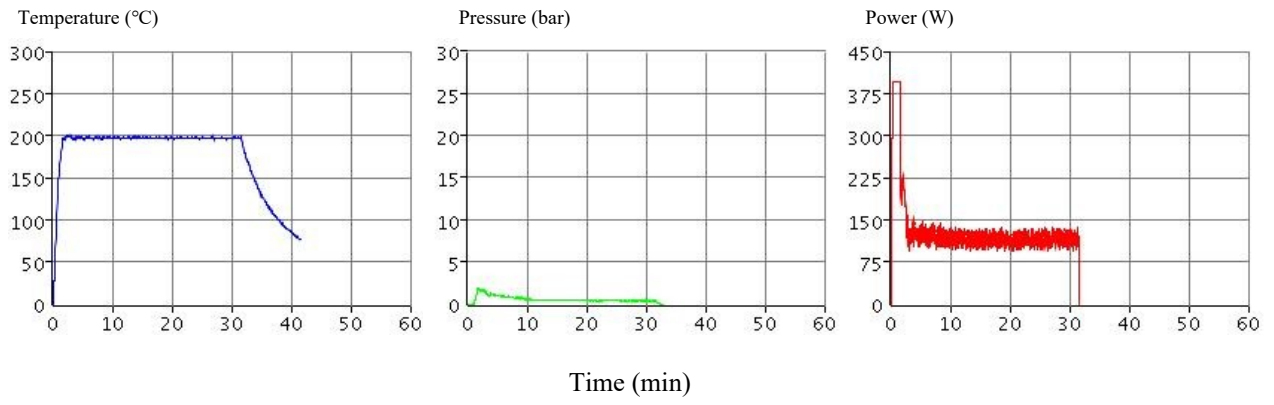

## NMR spectra and microwave data of compound 21

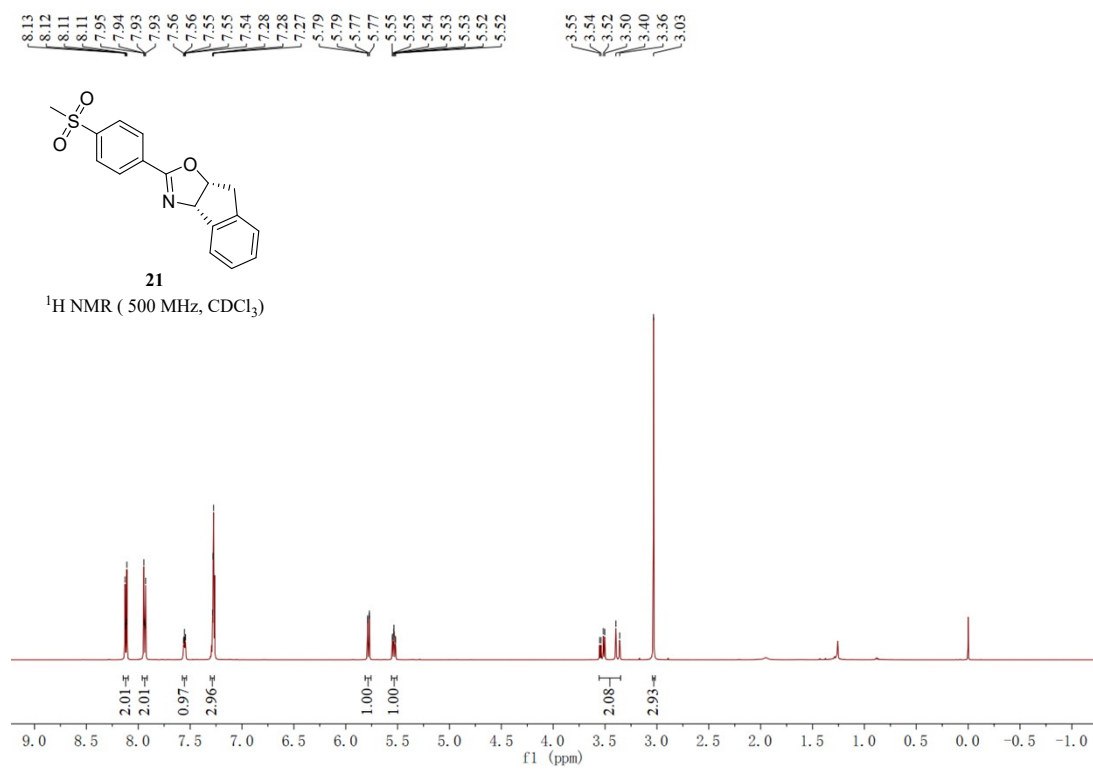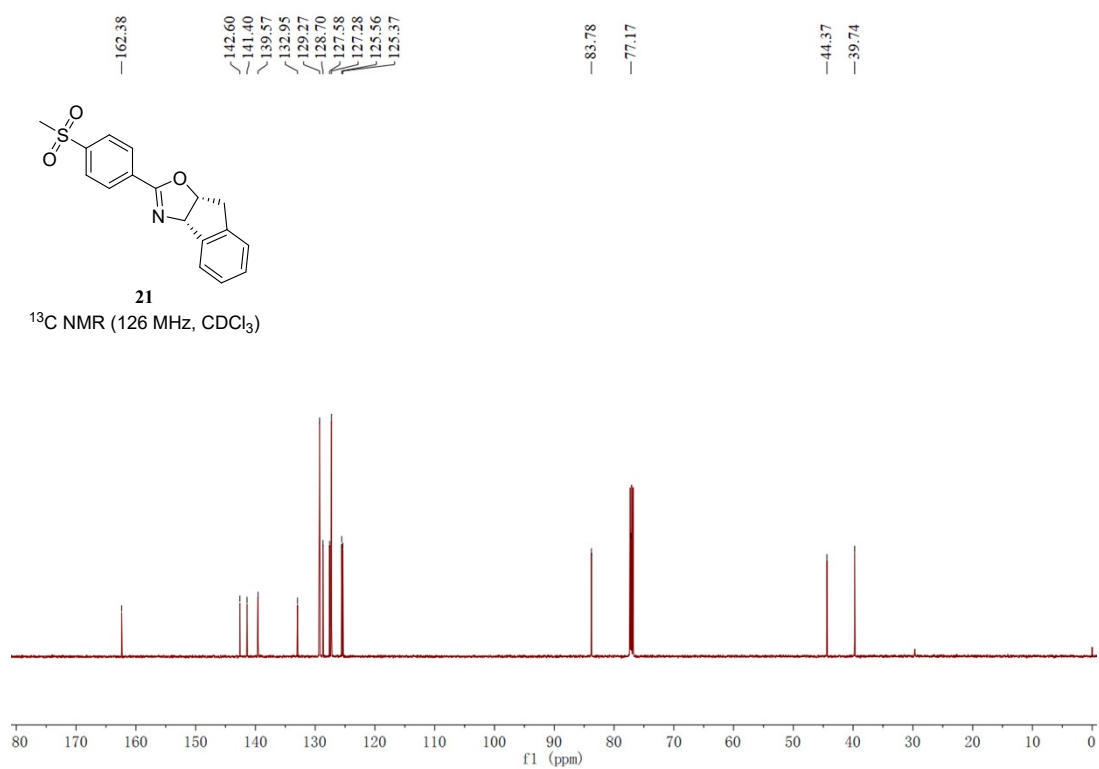

Temperature (°C)

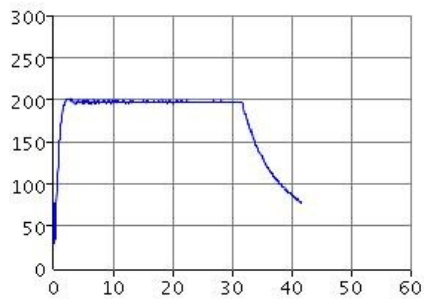

Pressure (bar)

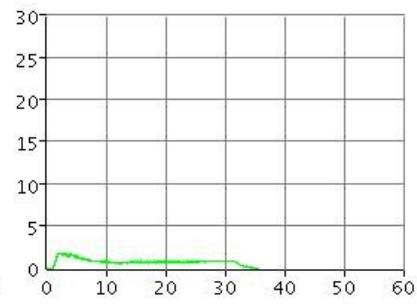

Power (W)

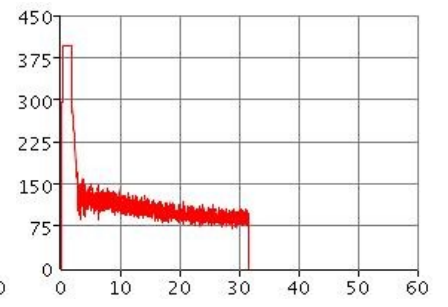

Time (min)

## NMR spectra and microwave data of compound 22

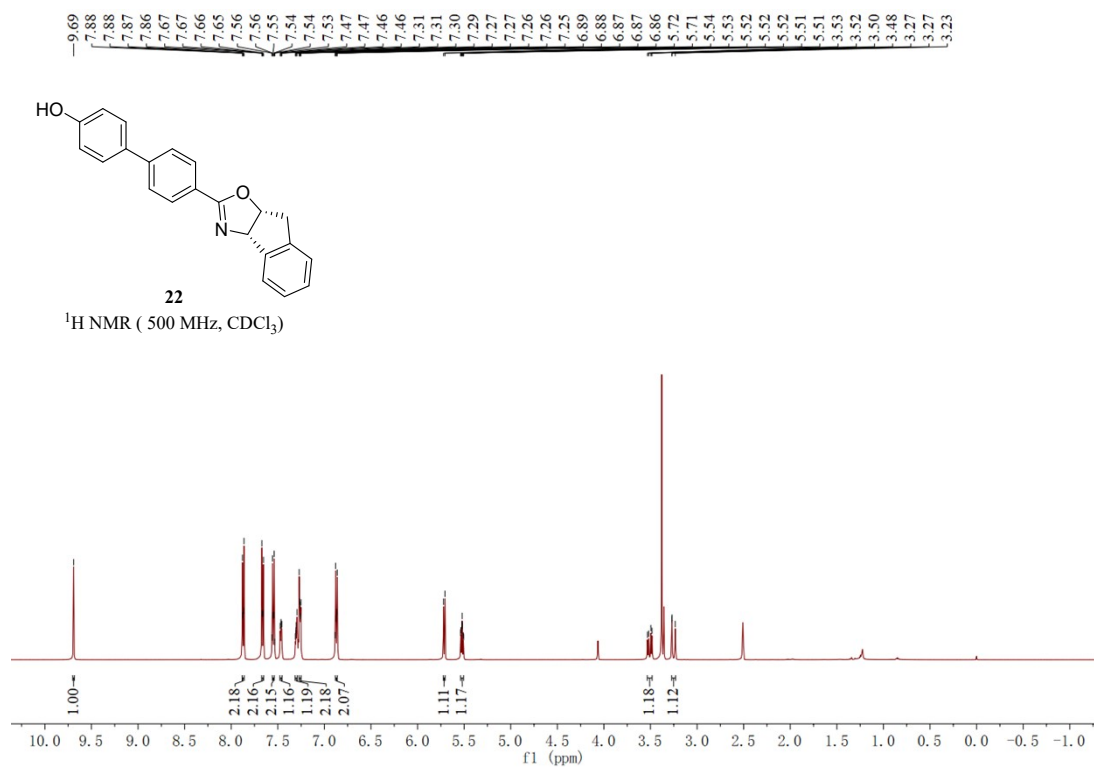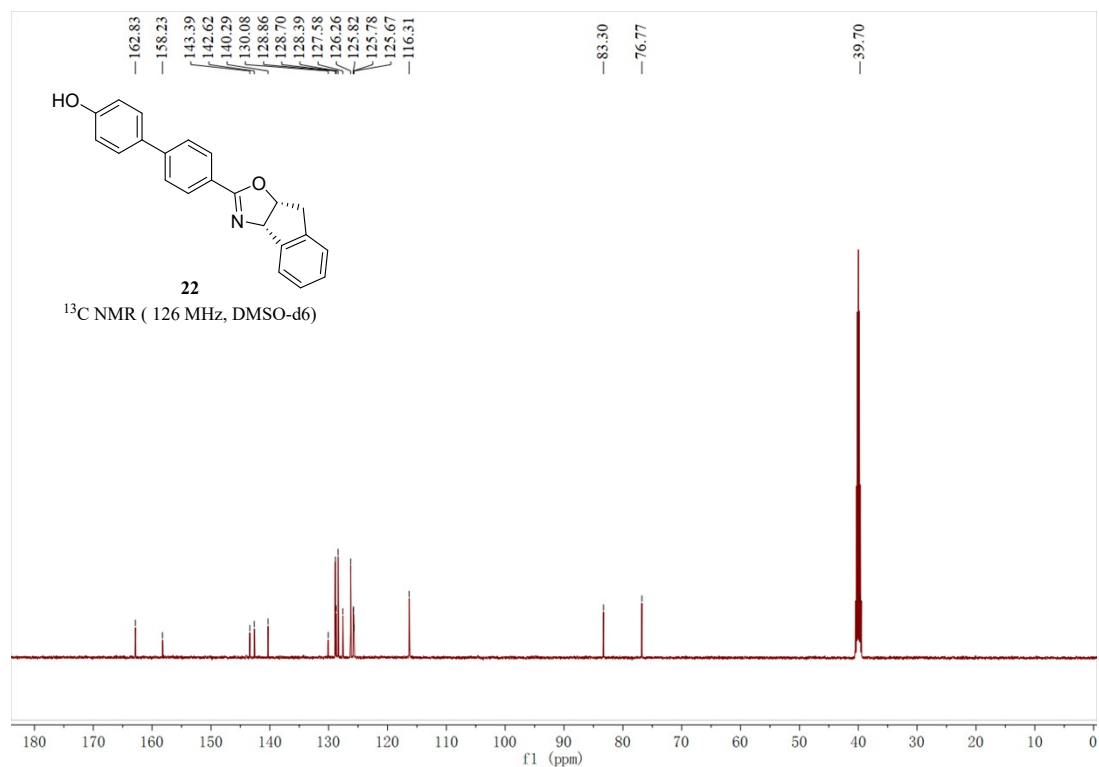

Temperature (°C)

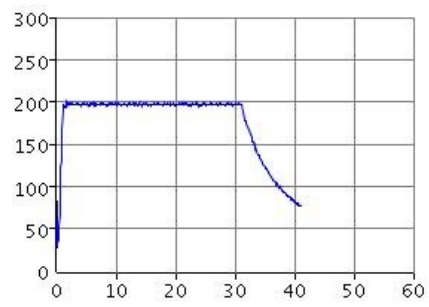

Pressure (bar)

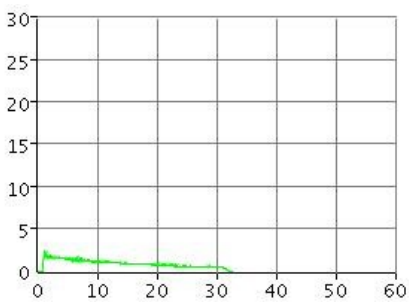

Power (W)

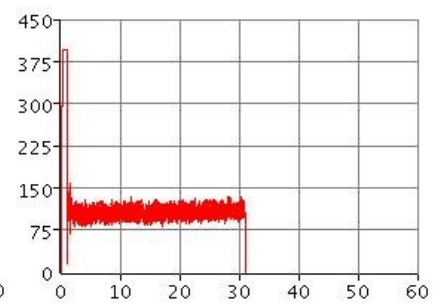

Time (min)

## NMR spectra and microwave data of compound 23

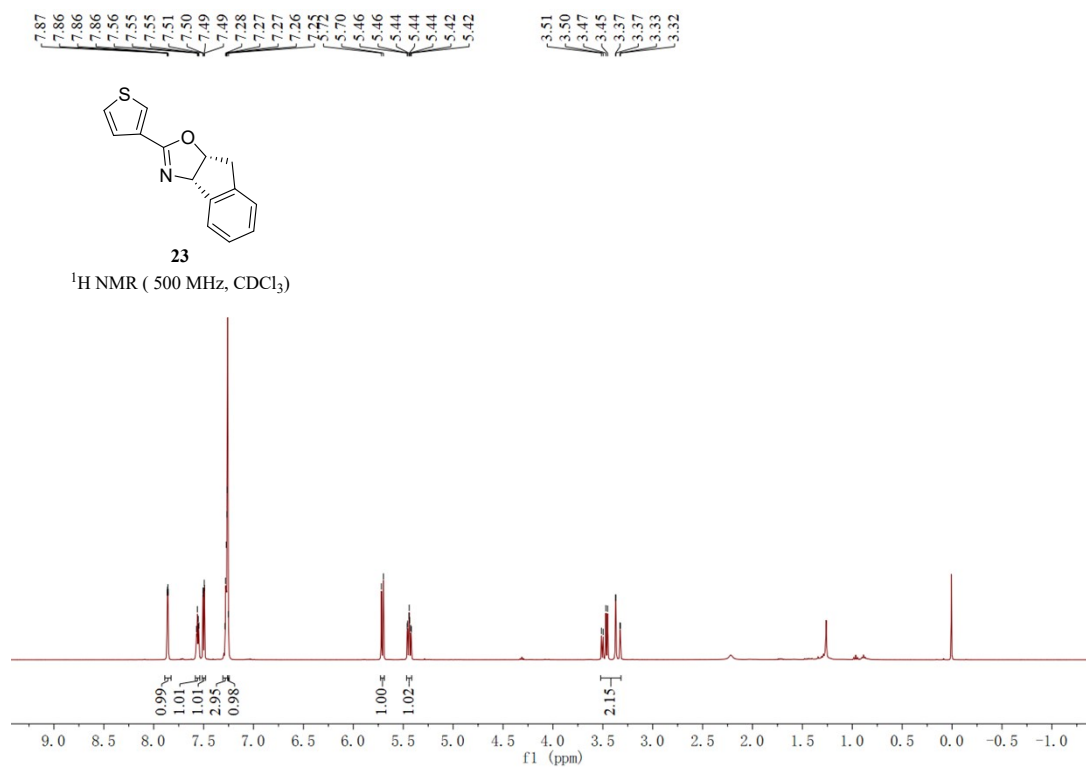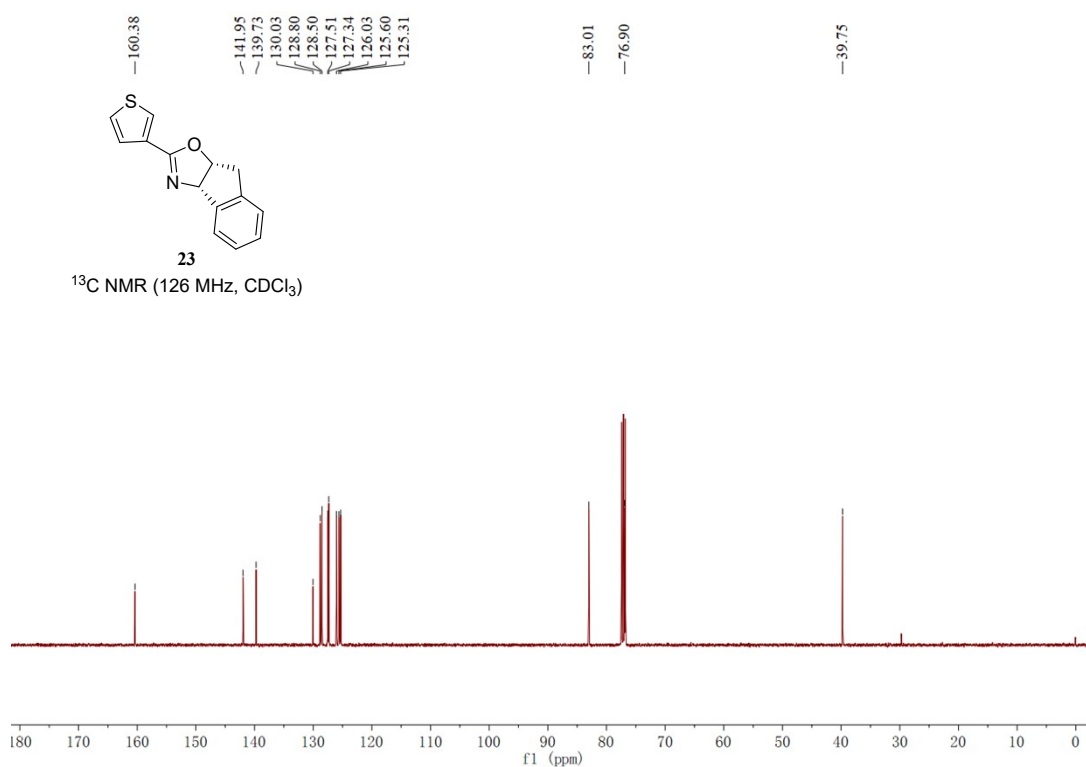

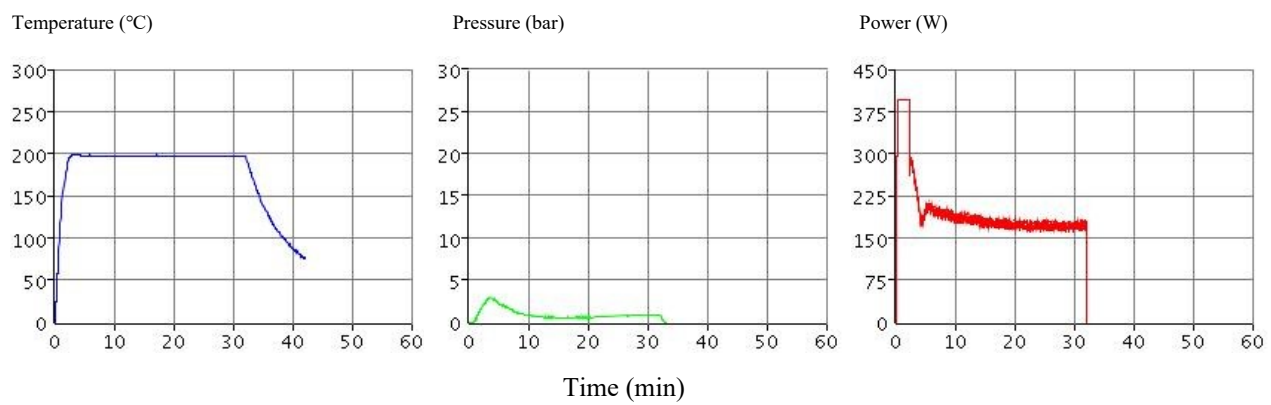



## NMR spectra and microwave data of compound 24

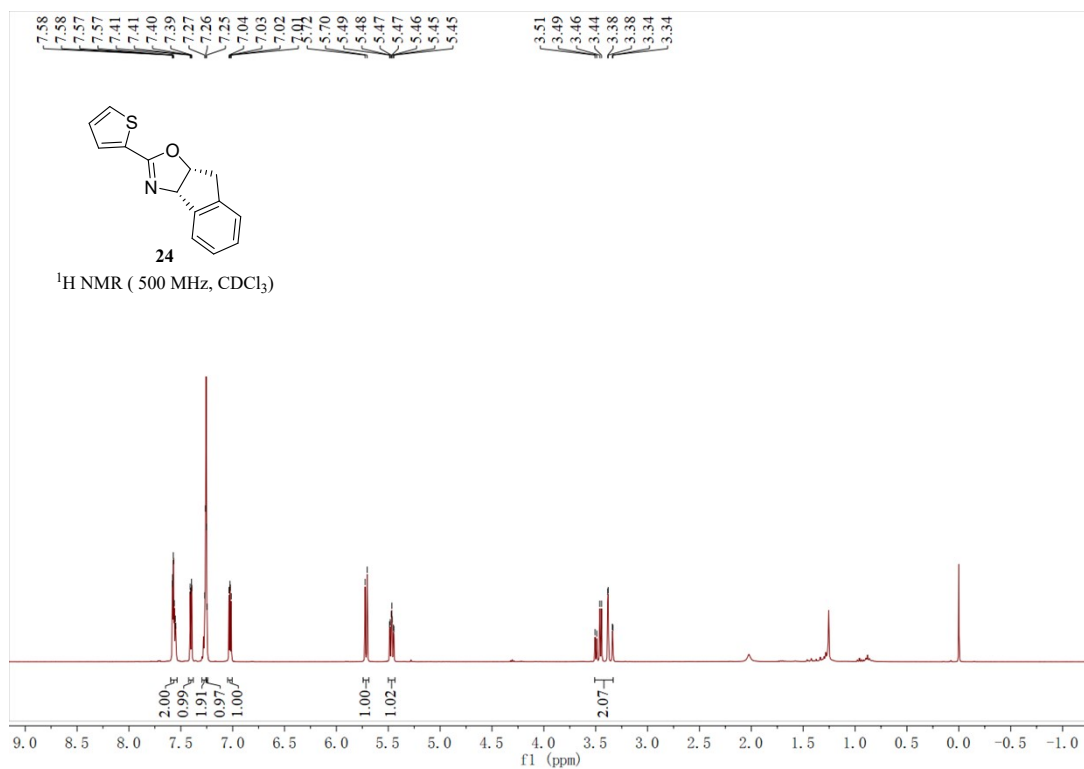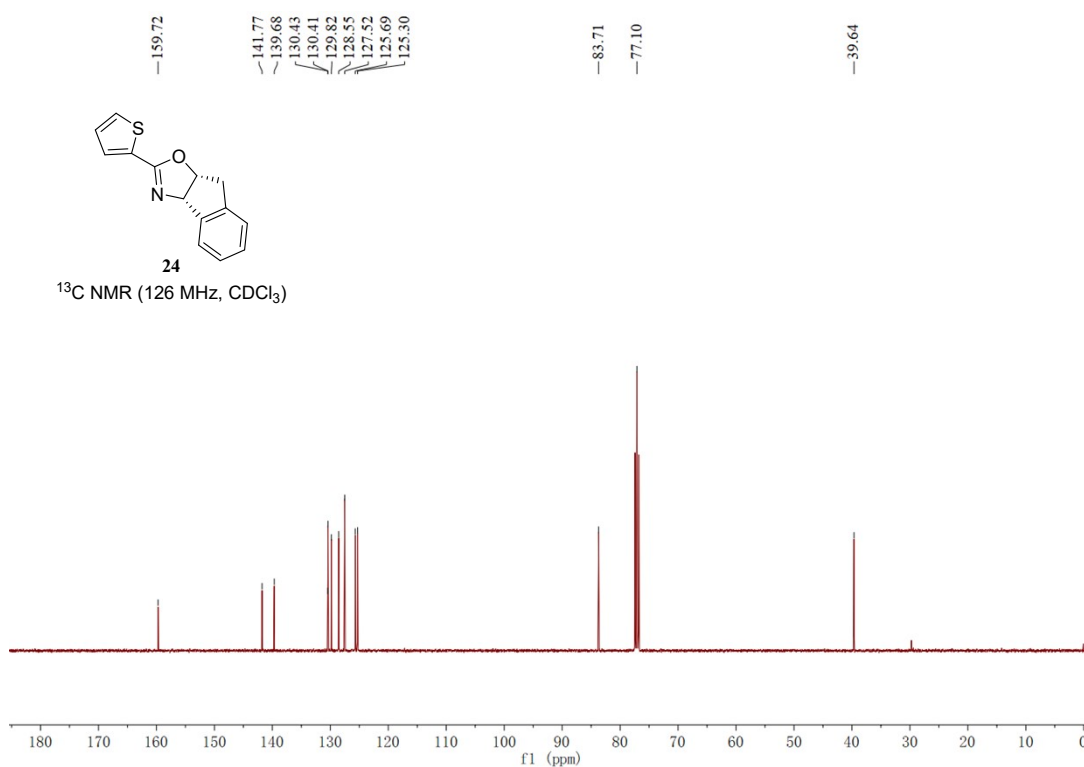

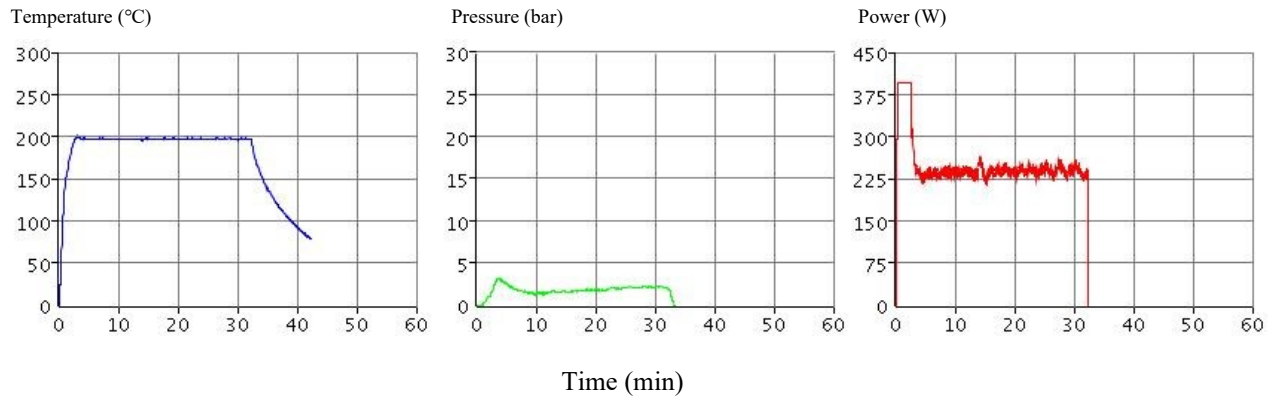

## NMR spectra and microwave data of compound 25

7.55  
7.55  
7.54  
7.54  
7.53  
7.53  
7.53  
7.48  
7.47  
7.29  
7.29  
7.28  
7.28  
7.27  
7.27  
5.73  
5.73  
5.71  
5.71  
5.50  
5.49  
5.48  
5.48  
5.48  
5.48  
5.47  
5.46  
3.51  
3.51  
3.50  
3.49  
3.47  
3.47  
3.46  
3.46  
3.37  
3.37  
3.34  
3.34

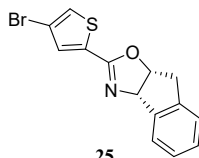

25

$^1\text{H NMR}$  (500 MHz,  $\text{CDCl}_3$ )

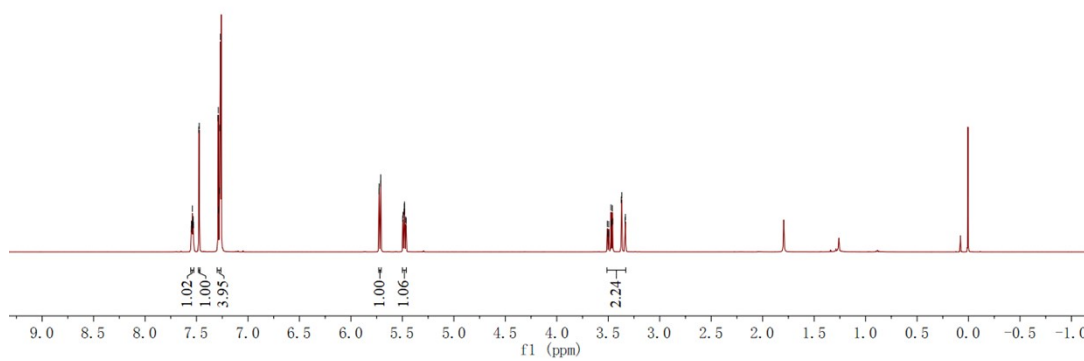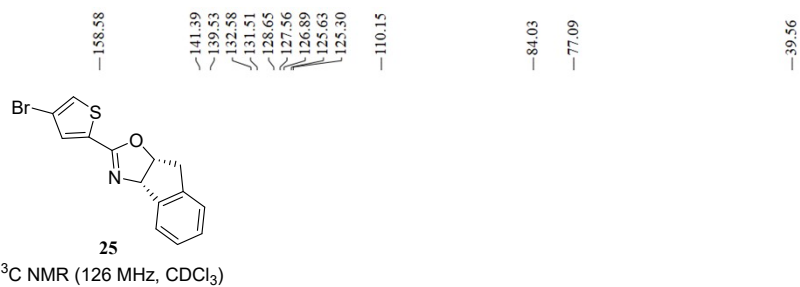

158.58  
141.39  
139.53  
132.58  
131.51  
128.65  
127.56  
126.89  
125.63  
125.30  
110.15  
84.03  
77.09  
39.56

$^{13}\text{C NMR}$  (126 MHz,  $\text{CDCl}_3$ )

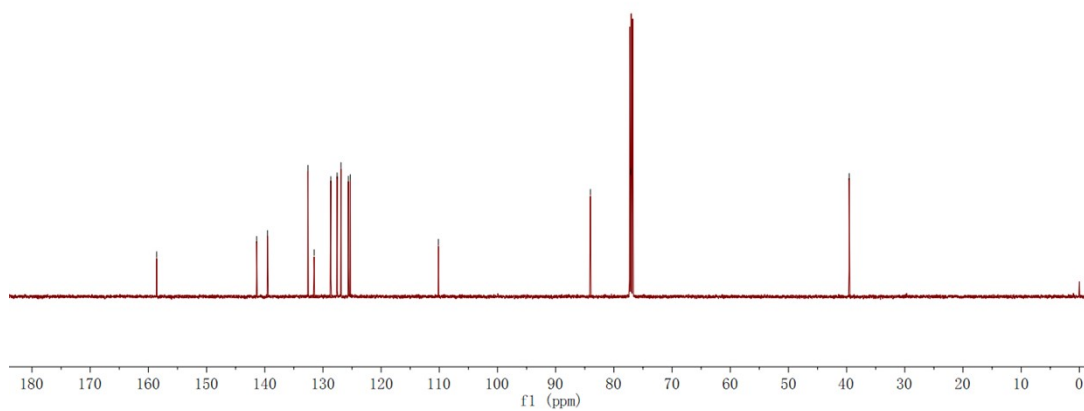

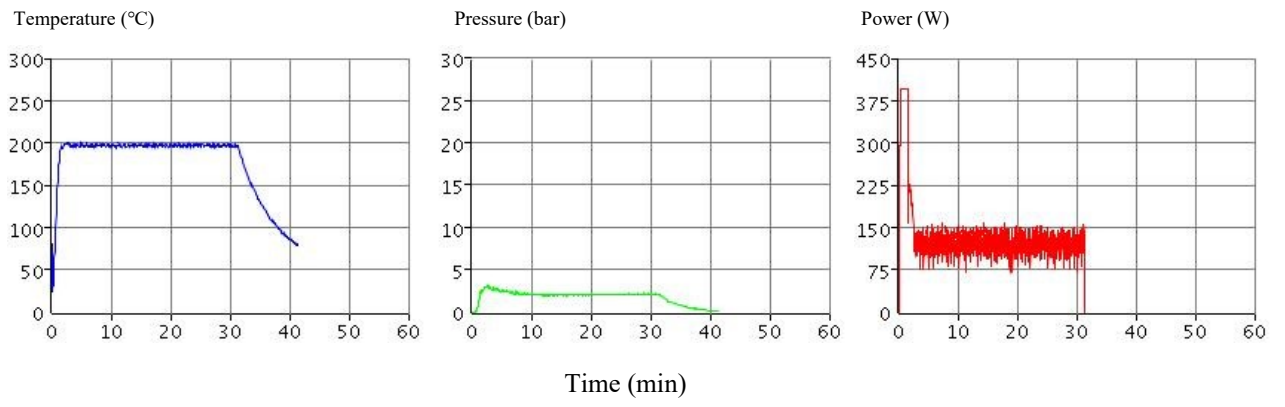

## NMR spectra and microwave data of compound 26

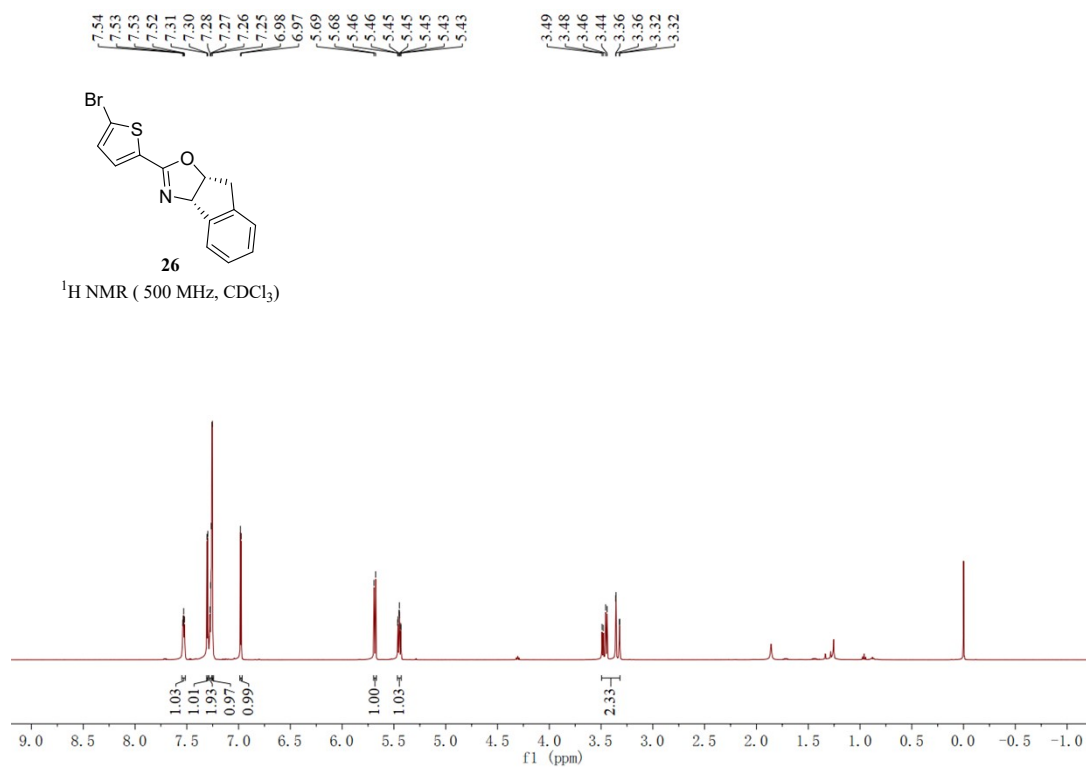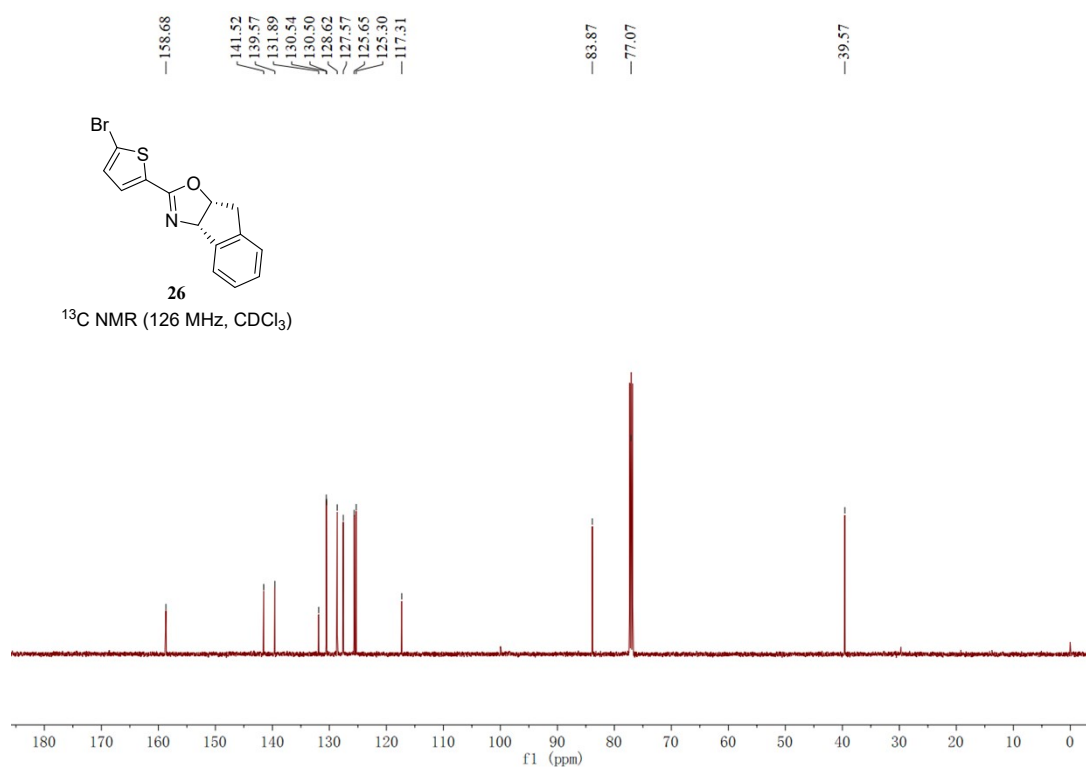

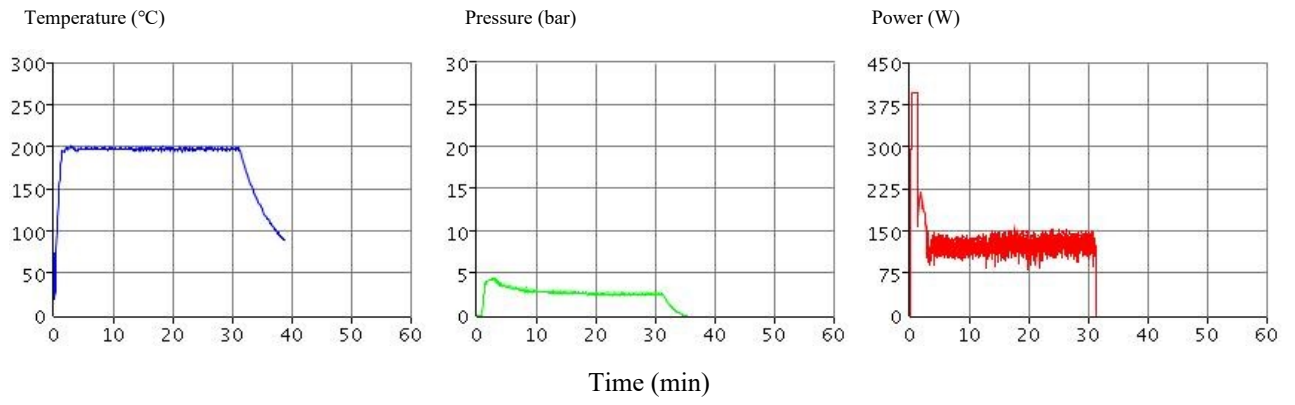

## NMR spectra and microwave data of compound 27

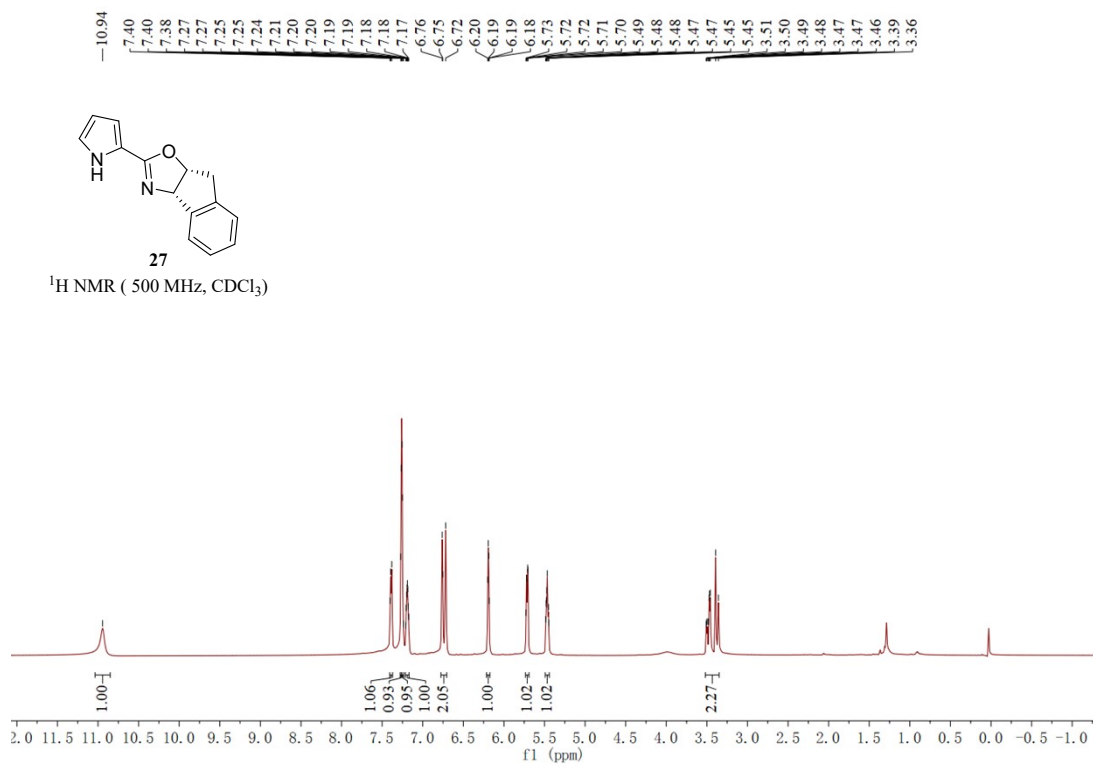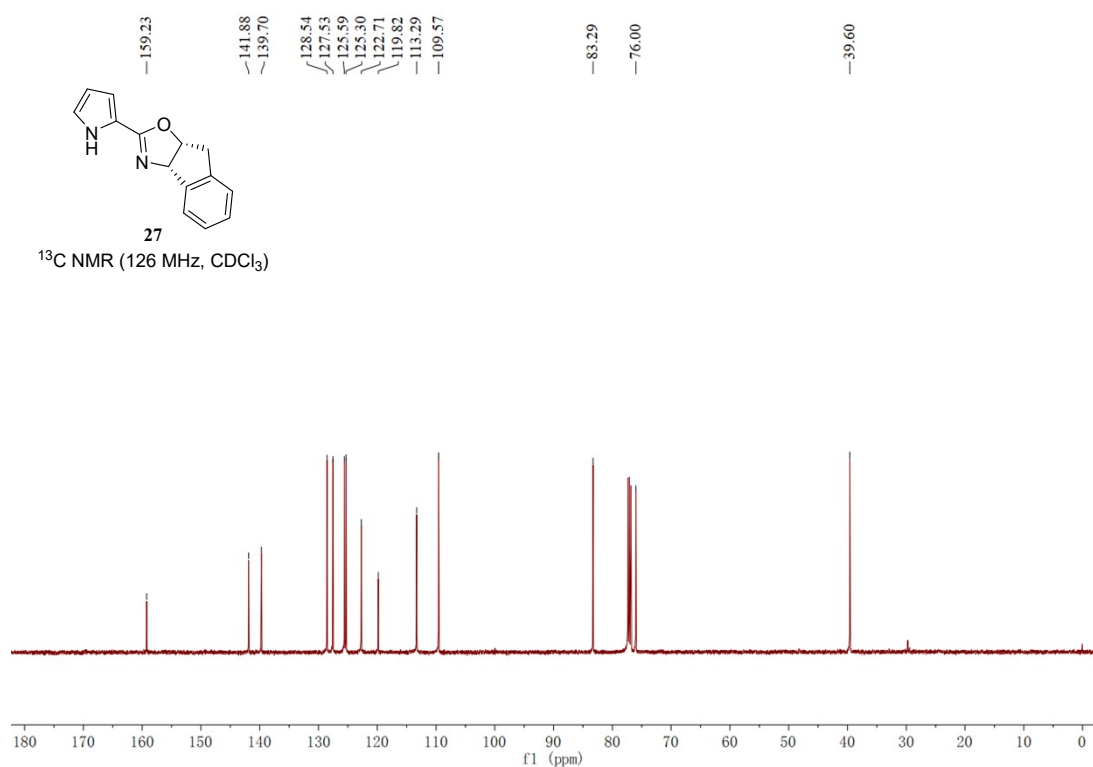

Temperature (°C)

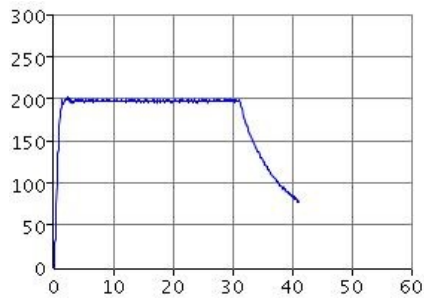

Pressure (bar)

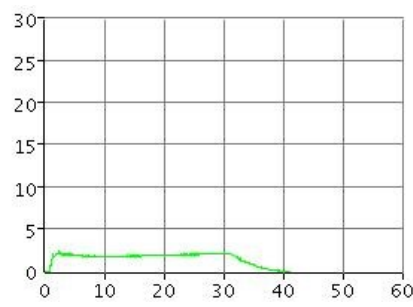

Power (W)

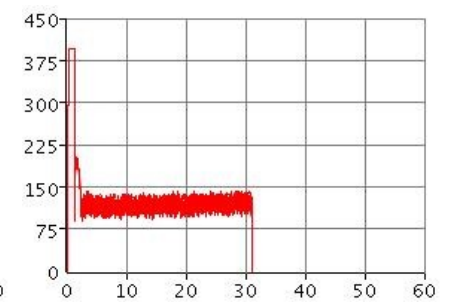

Time (min)



## NMR spectra and microwave data of compound 28

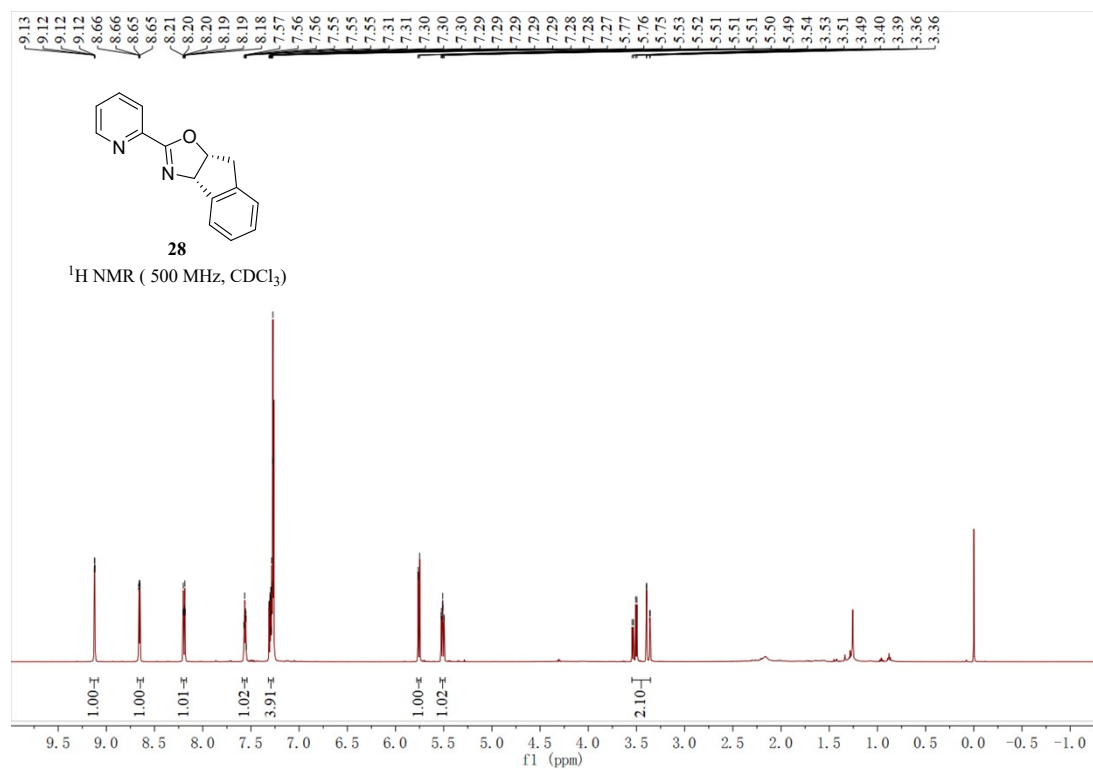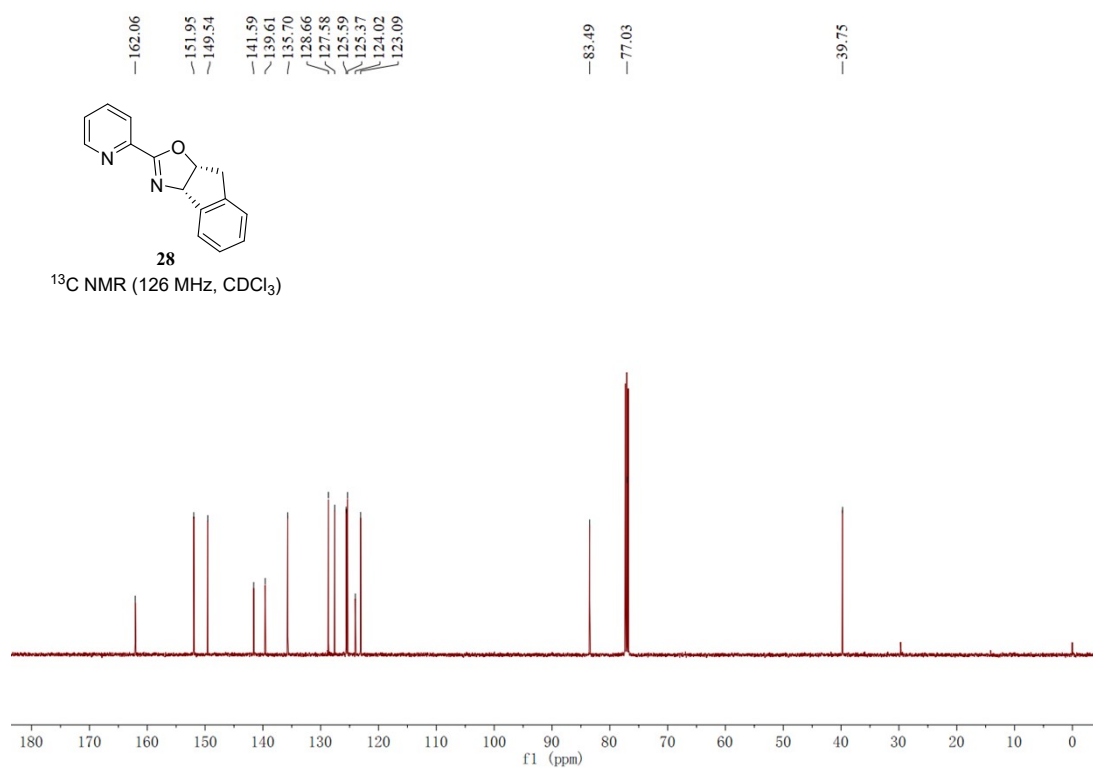

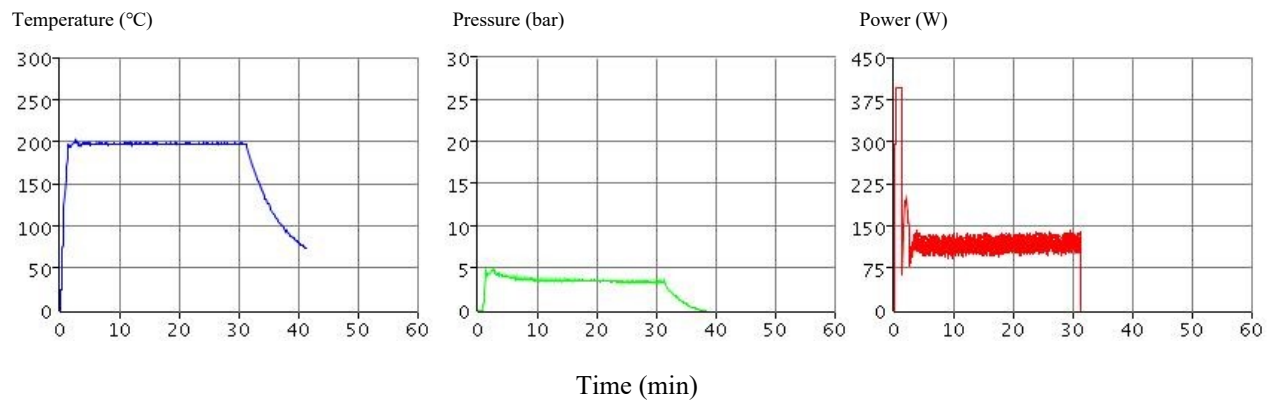

## NMR spectra and microwave data of compound 29

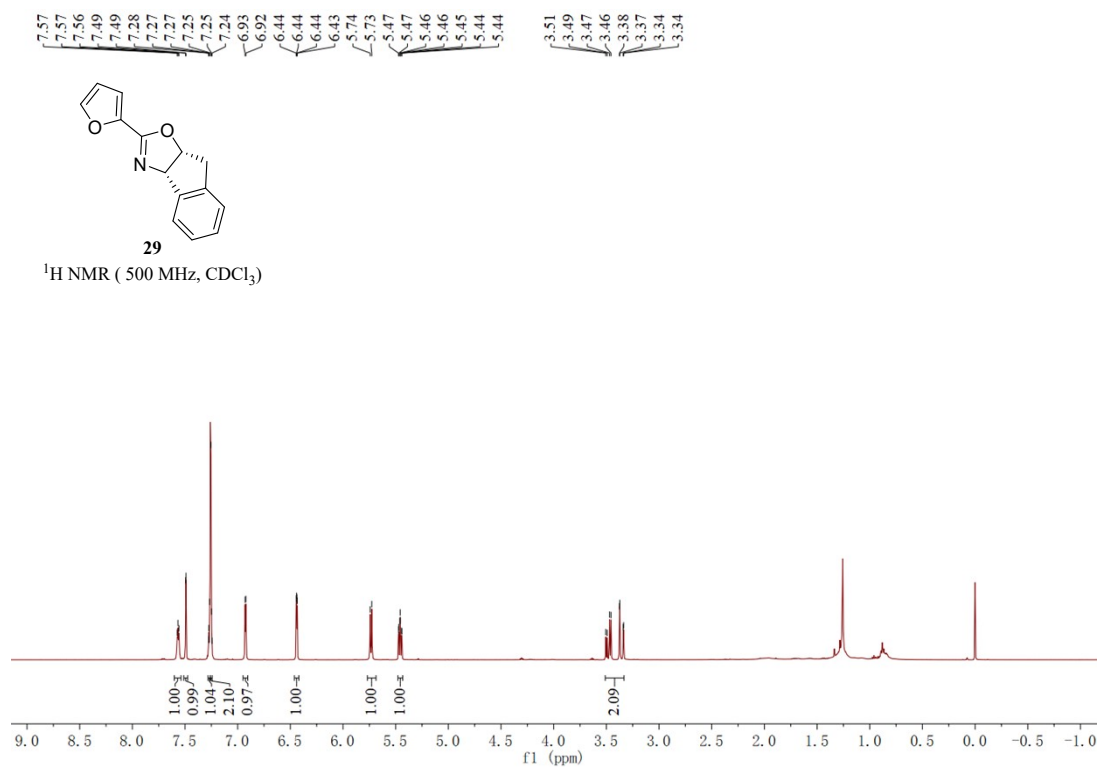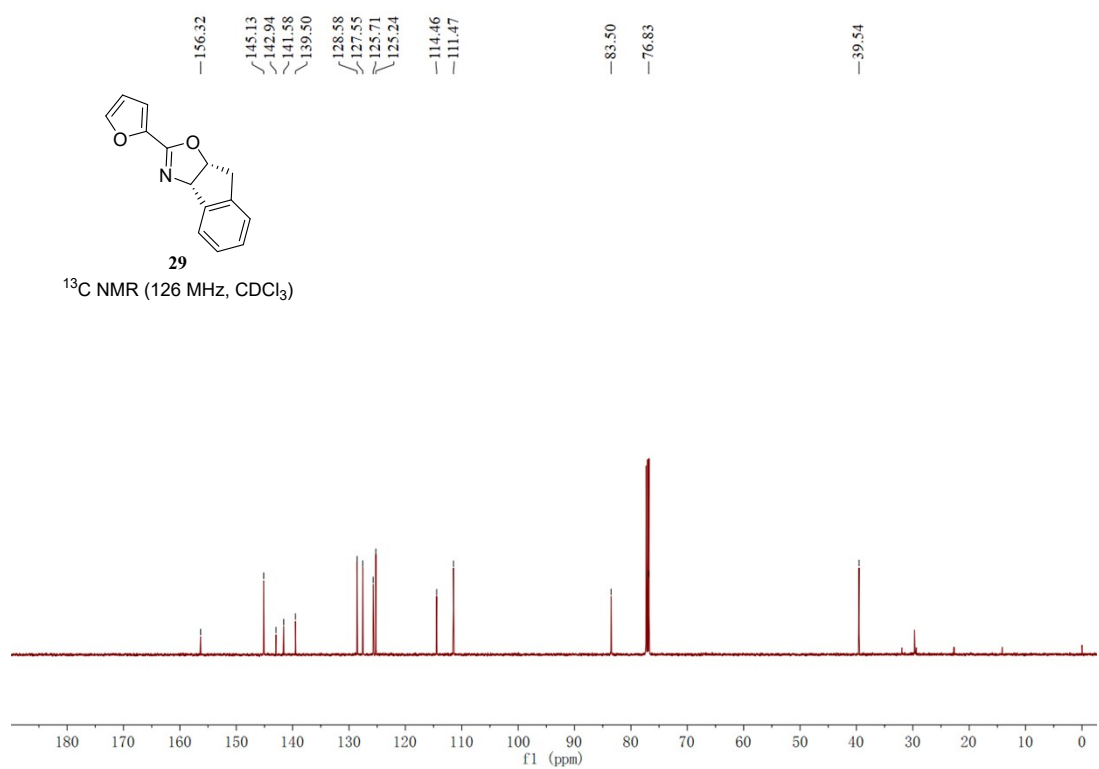

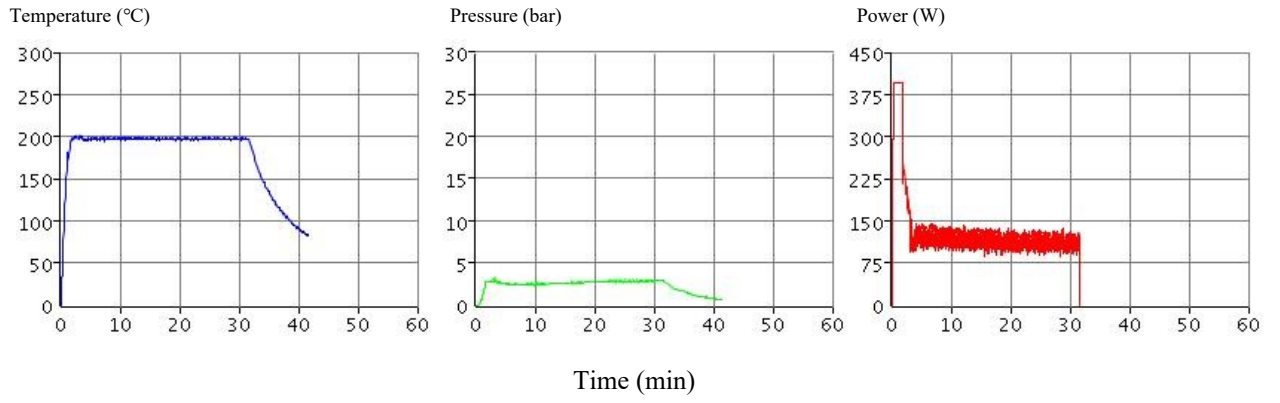

## NMR spectra and microwave data of compound 30

7.63  
7.62  
7.62  
7.62  
7.61  
7.61  
7.60  
7.60  
7.60  
7.56  
7.56  
7.55  
7.54  
7.54  
7.54  
7.38  
7.38  
7.37  
7.36  
7.36  
7.35  
7.35  
7.30  
7.30  
7.29  
7.29  
7.28  
7.28  
7.28  
7.27  
7.27  
7.25  
7.25  
7.24  
7.24  
5.82  
5.80  
5.55  
5.54  
5.53  
5.53  
5.53  
5.52  
5.51  
3.55  
3.53  
3.51  
3.50  
3.43  
3.42  
3.39  
3.39

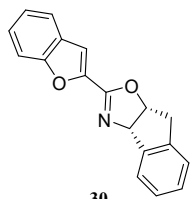

30

$^1\text{H NMR}$  (500 MHz,  $\text{CDCl}_3$ )

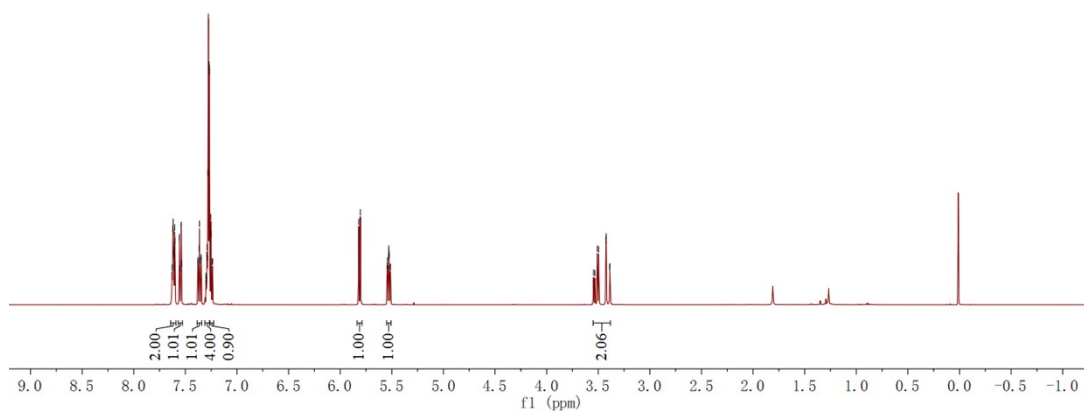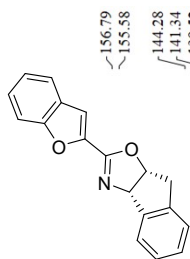

30

$^{13}\text{C NMR}$  (126 MHz,  $\text{CDCl}_3$ )

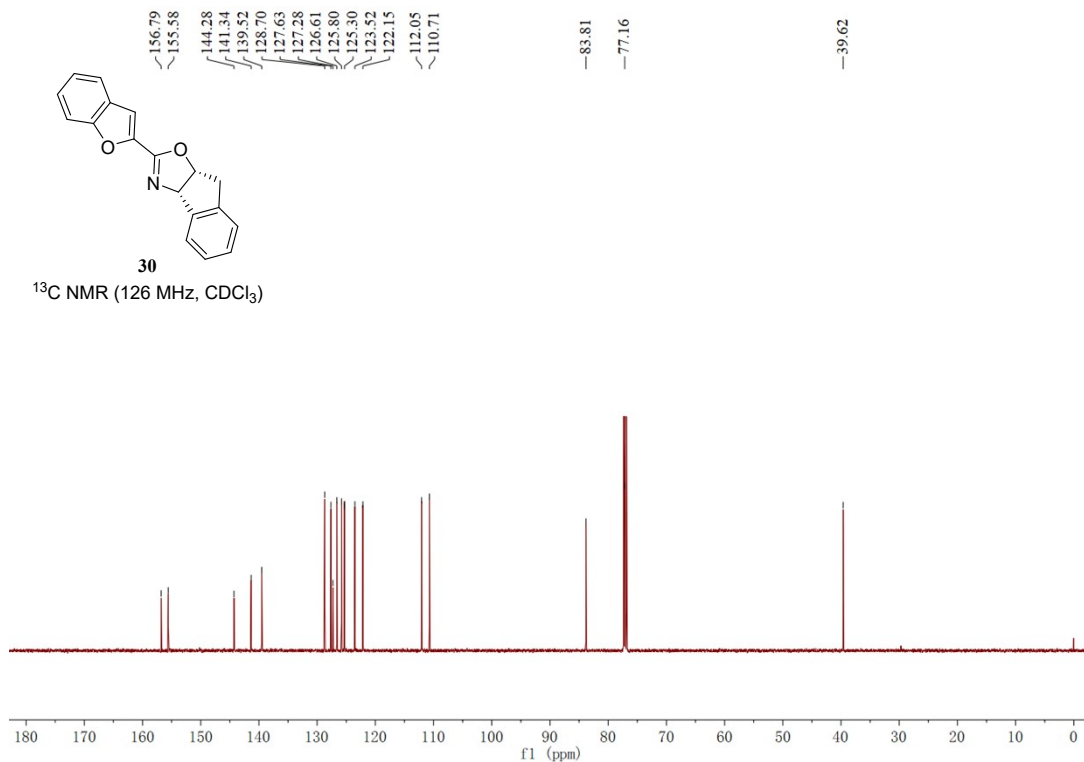

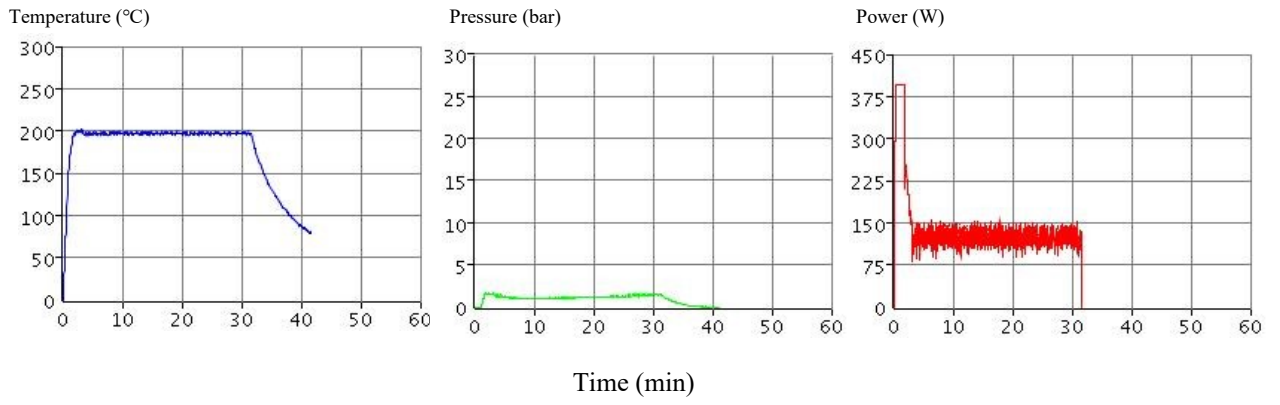

## NMR spectra and microwave data of compound 31

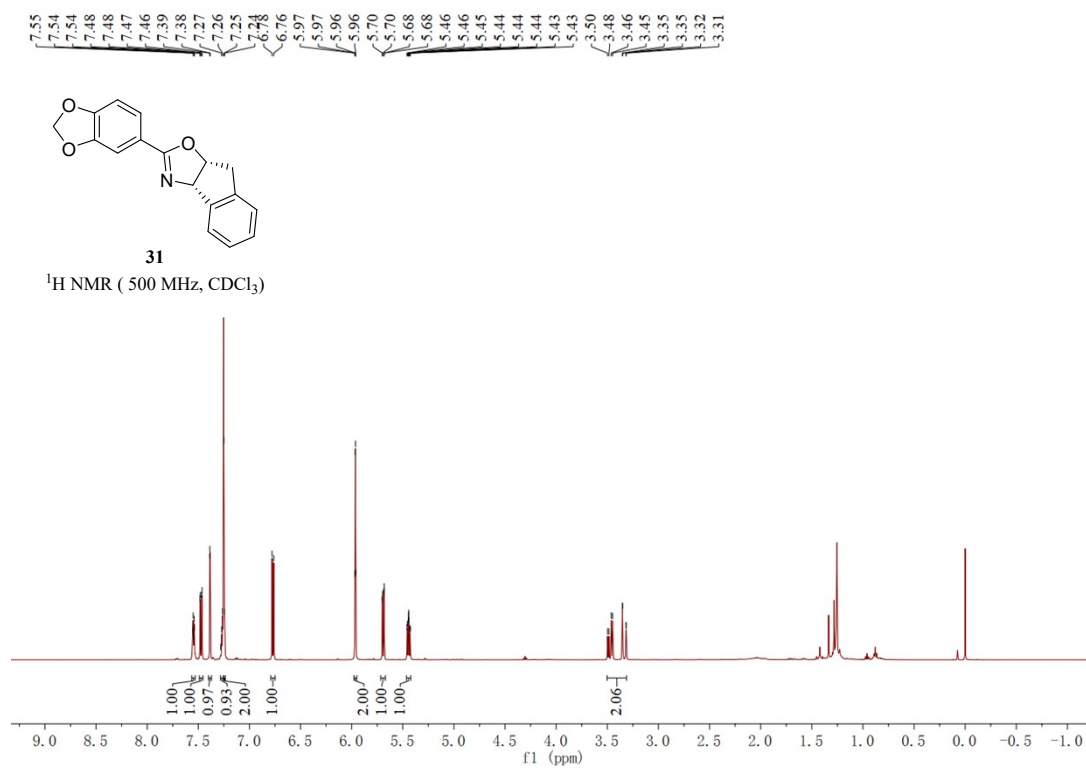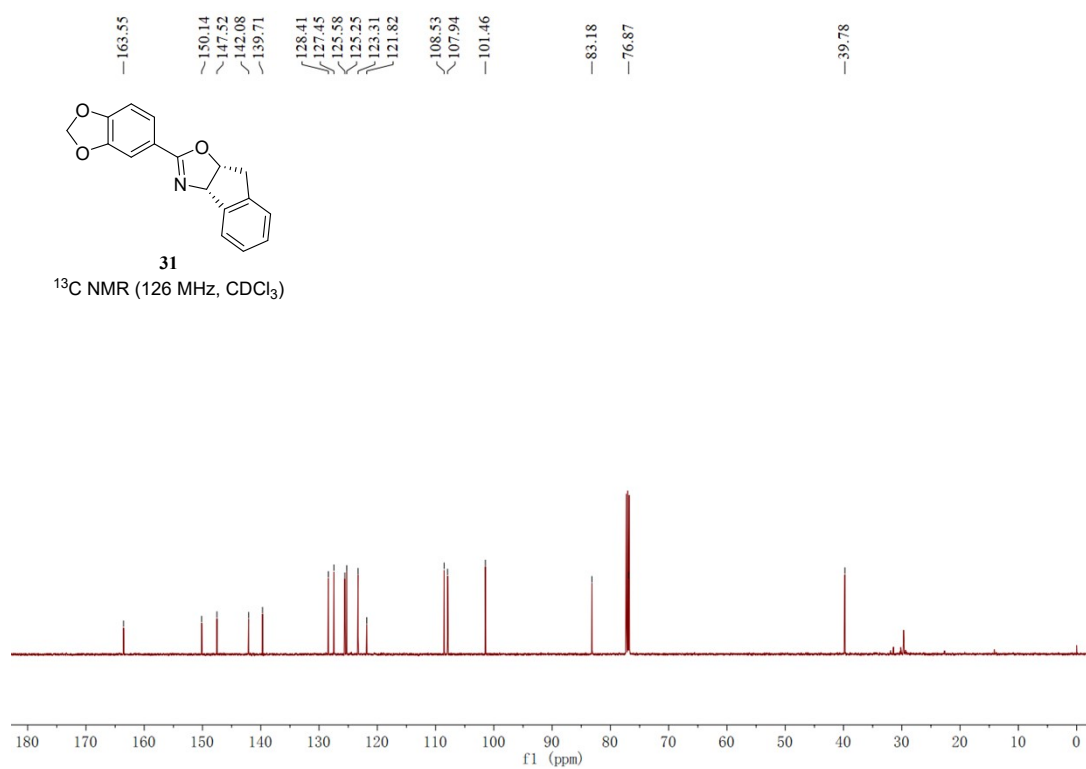

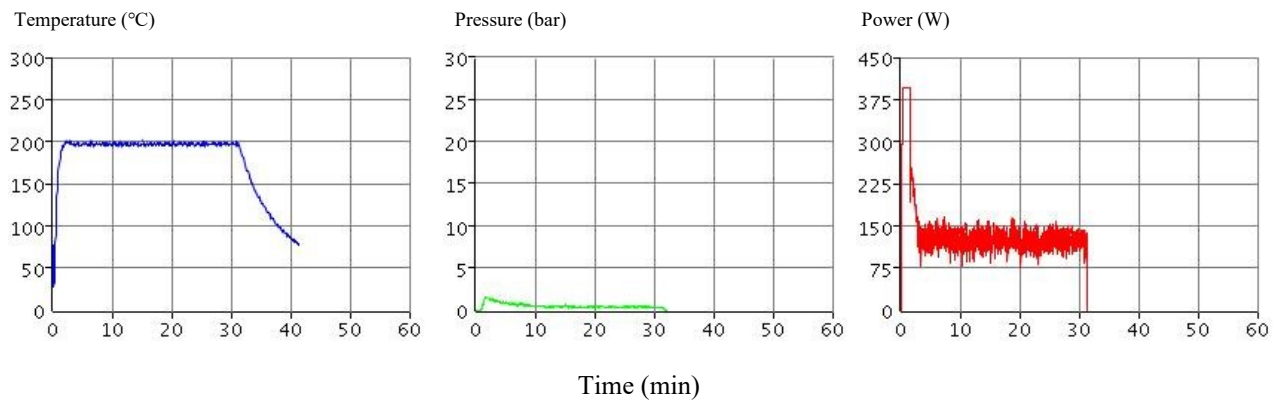



## NMR spectra and microwave data of compound 32

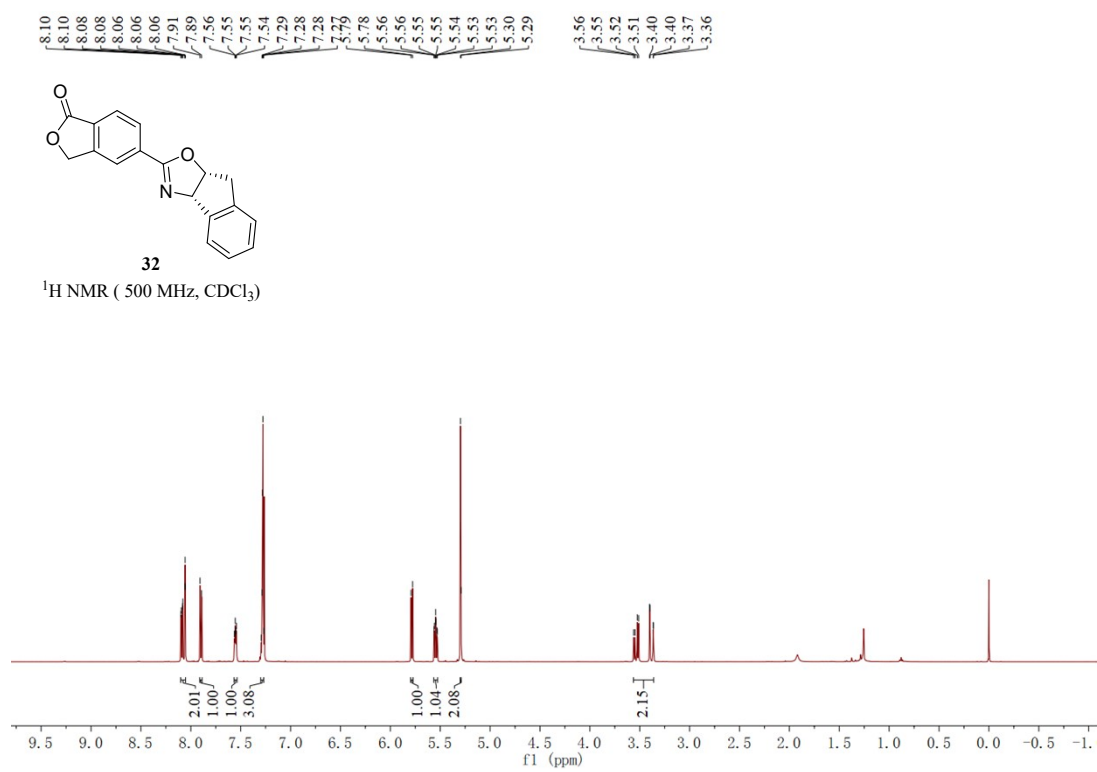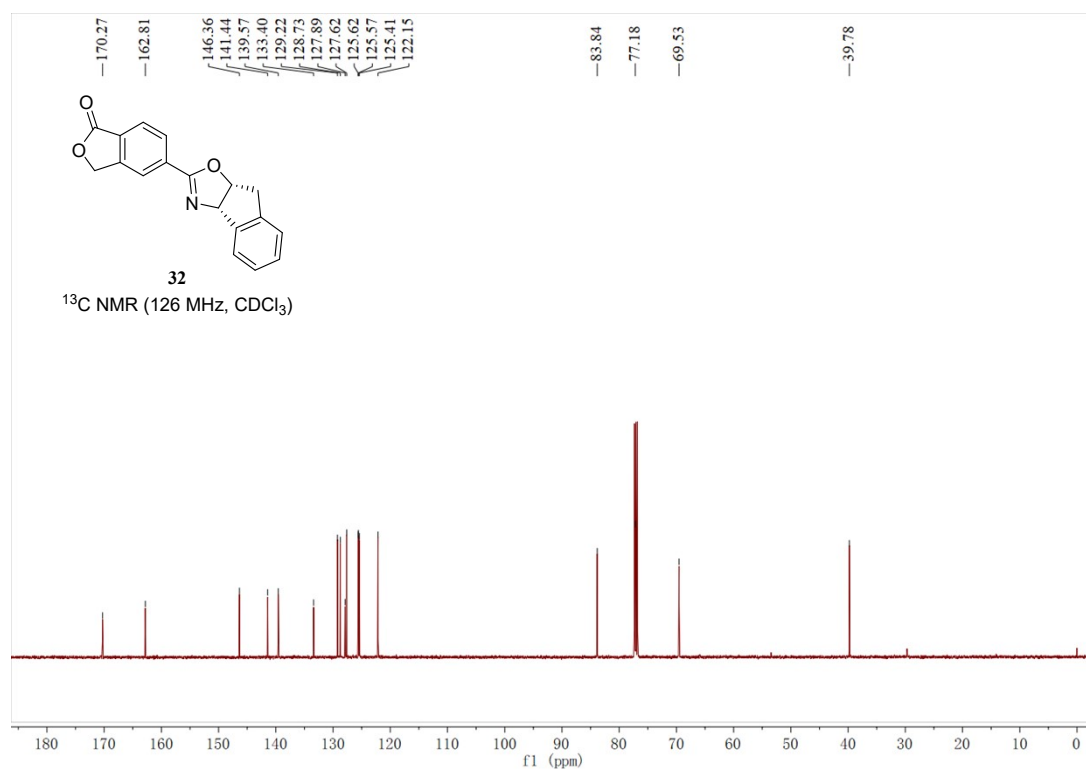

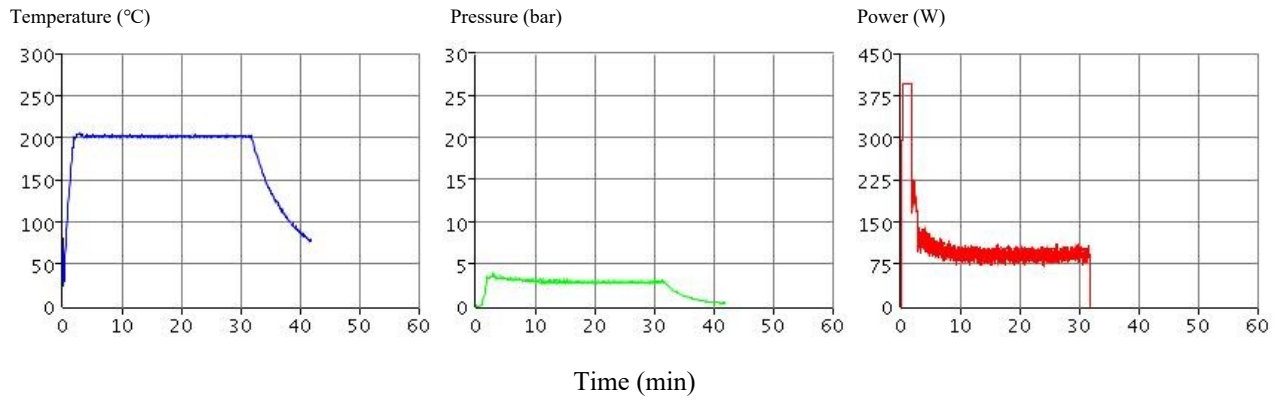

## NMR spectra and microwave data of compound 33

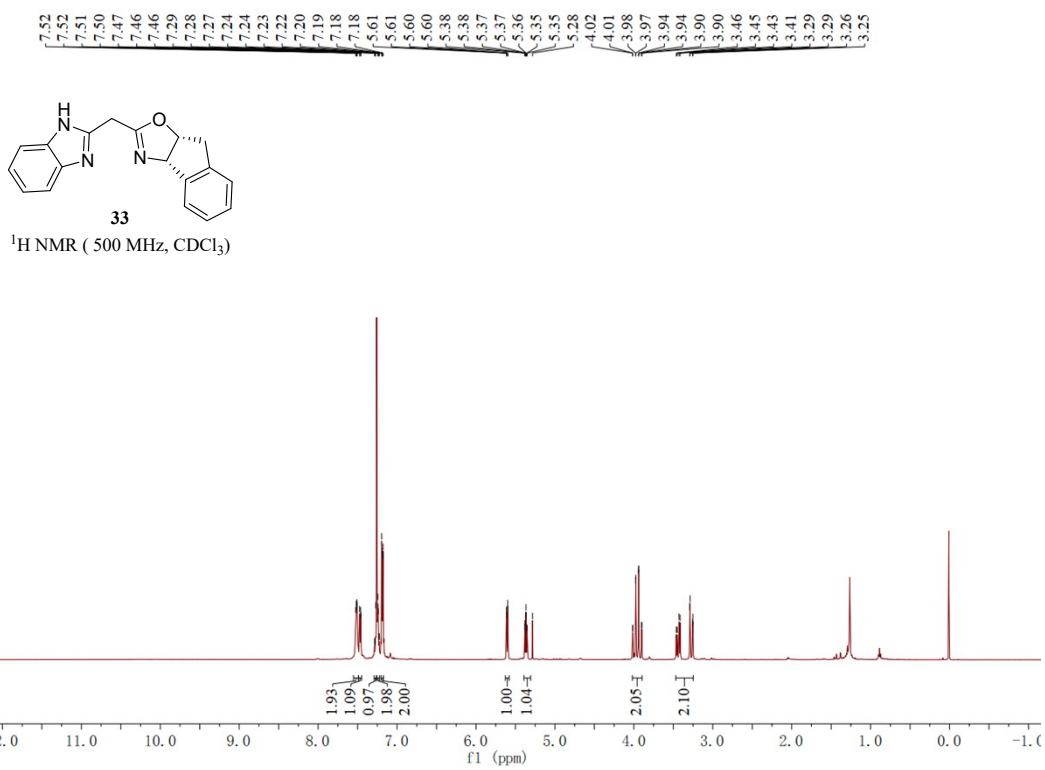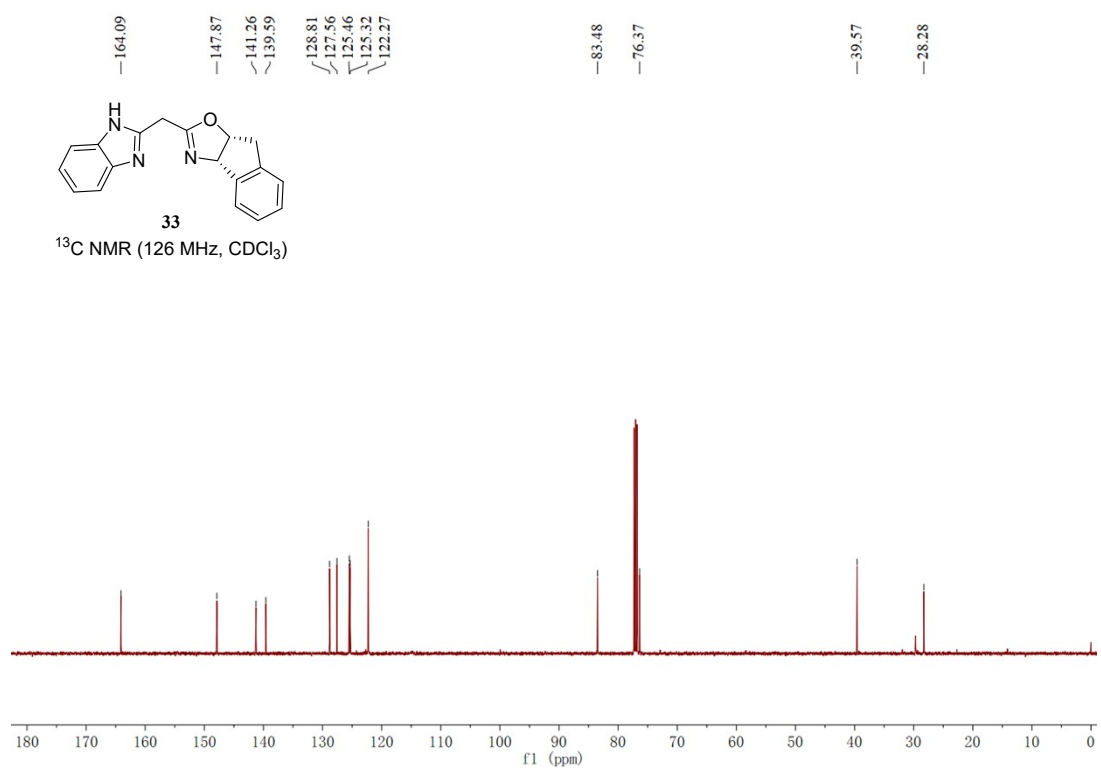

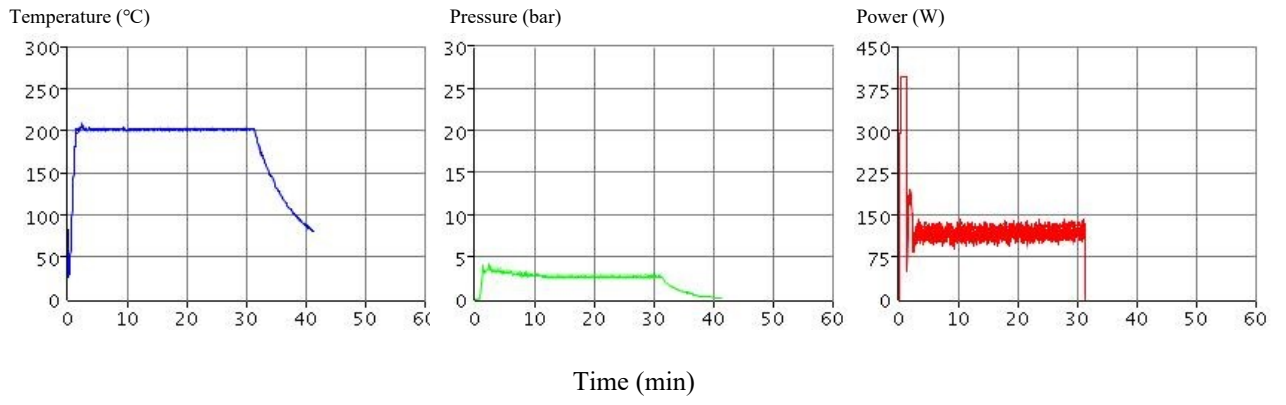

### NMR spectra and microwave data of compound 34

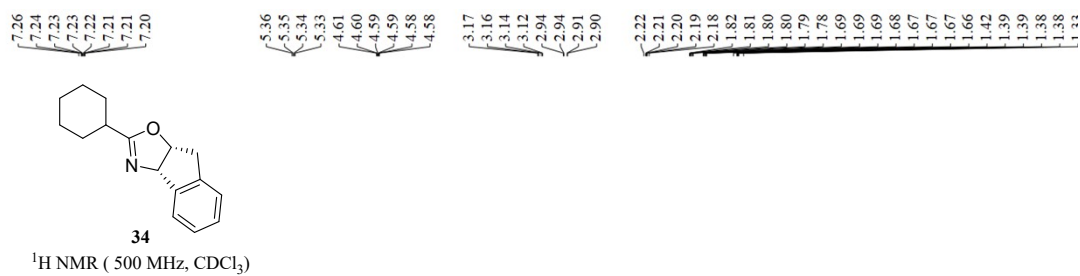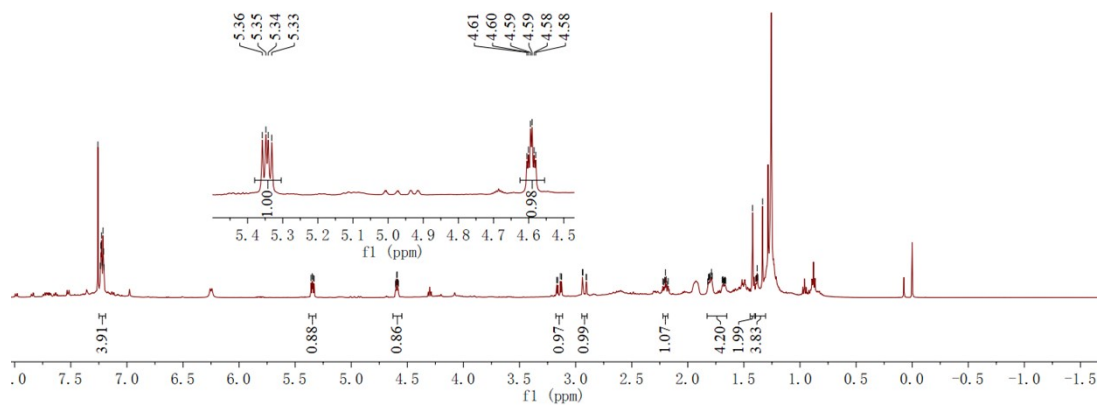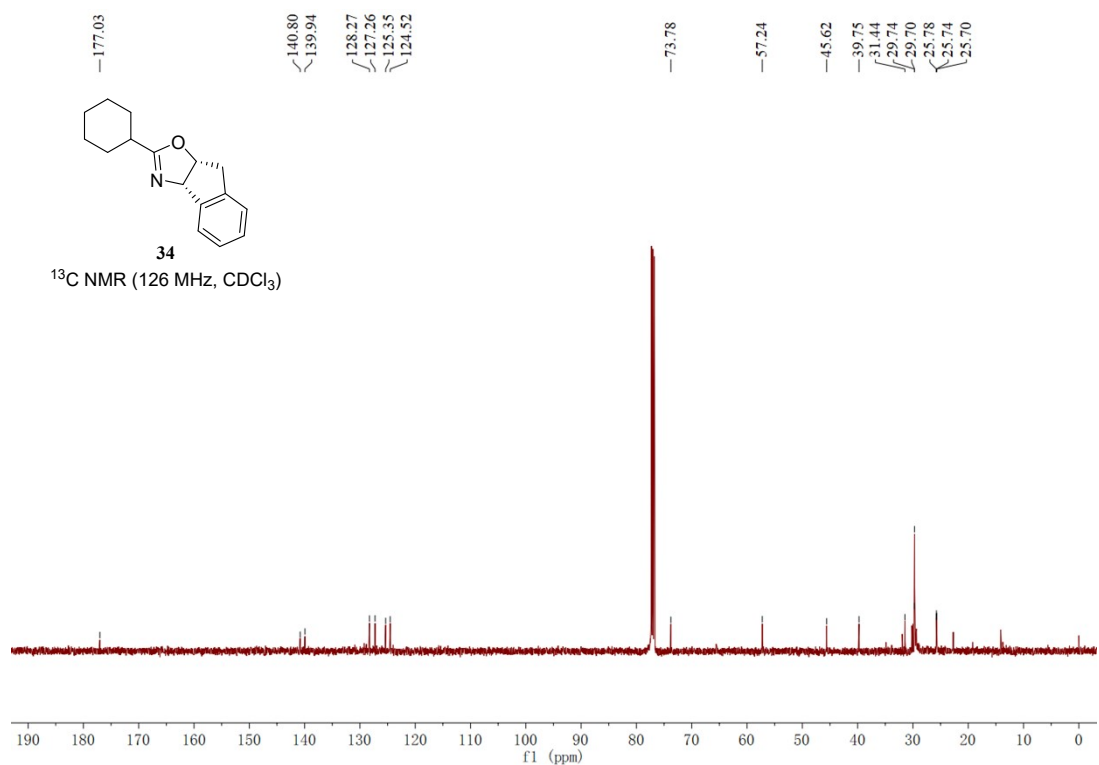

Temperature (°C)

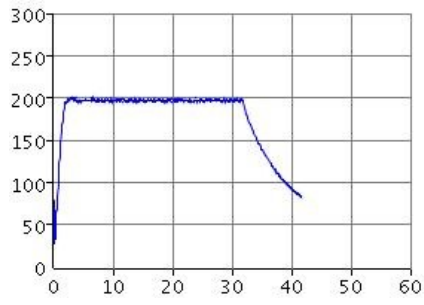

Pressure (bar)

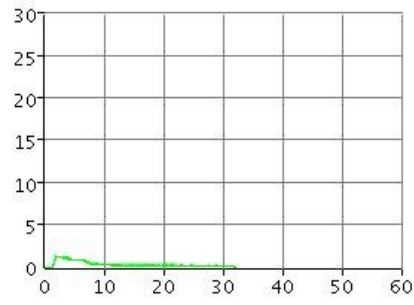

Power (W)

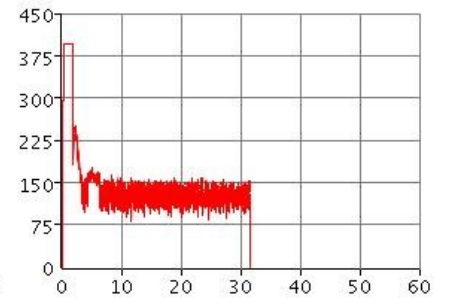

Time (min)

## NMR spectra and microwave data of compound 35a, 35b

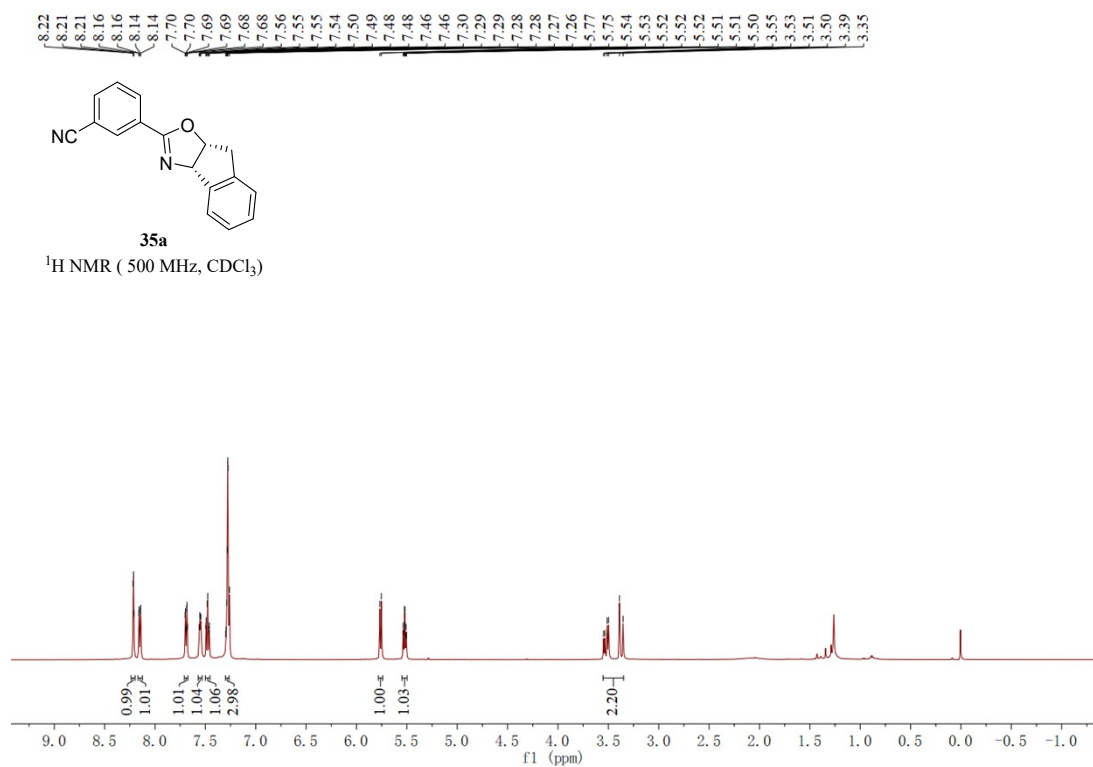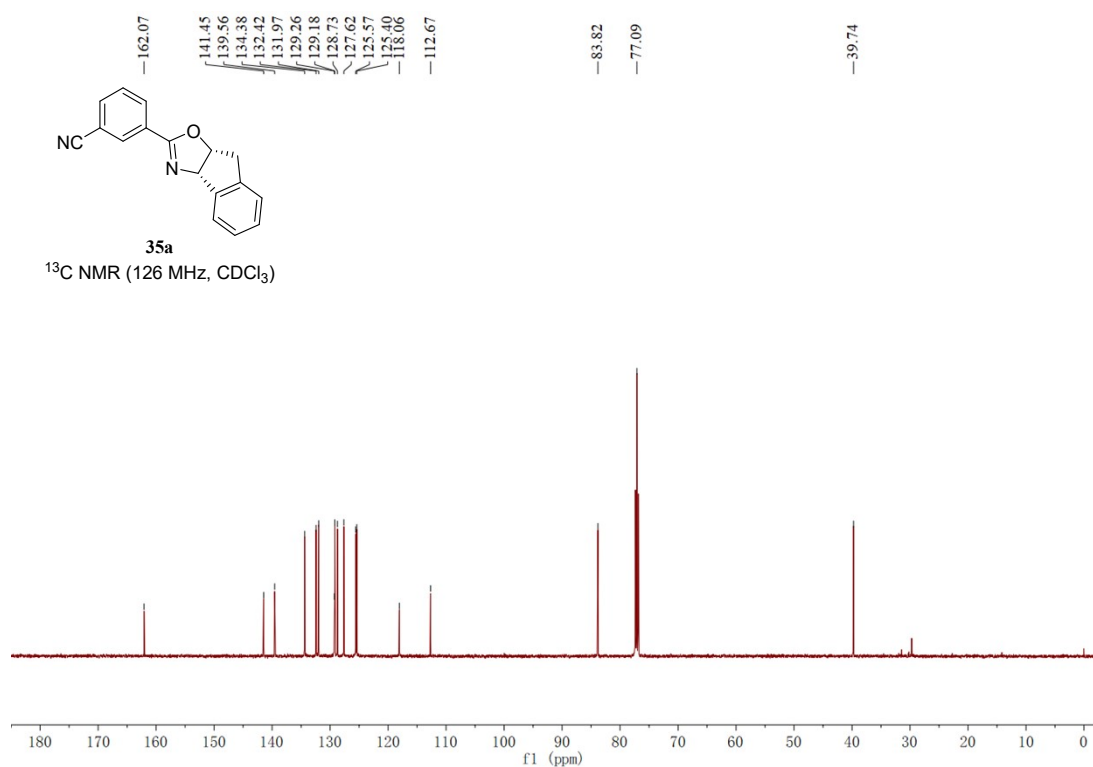

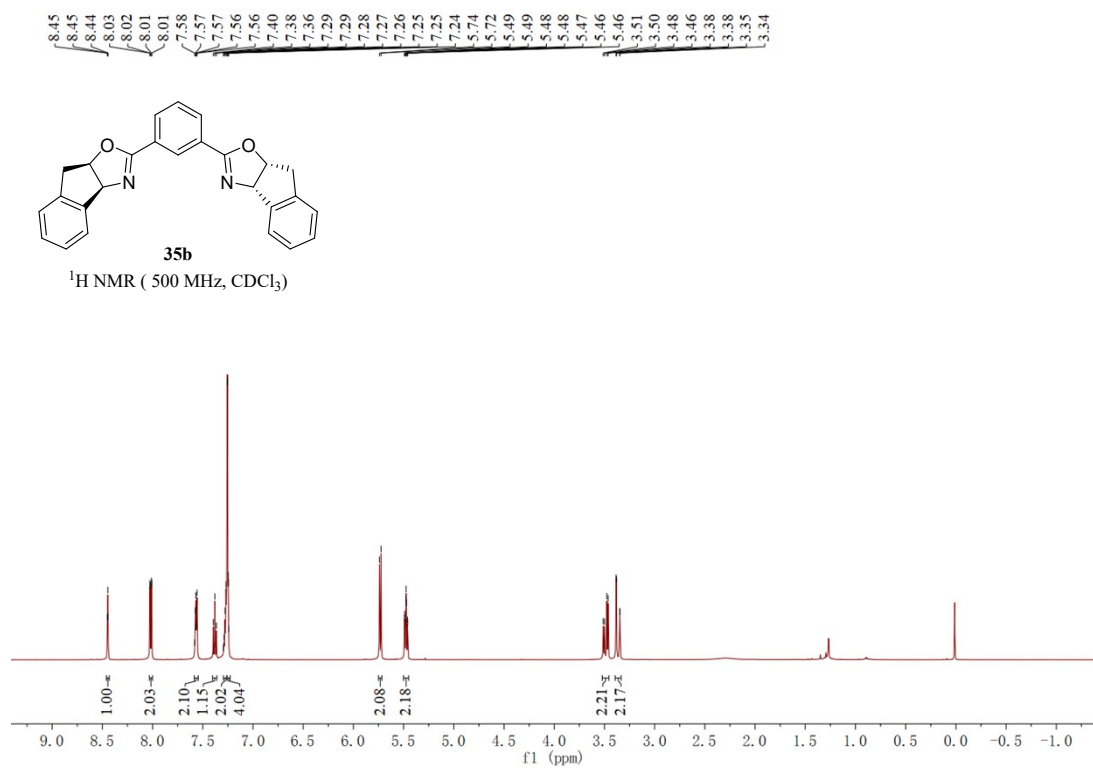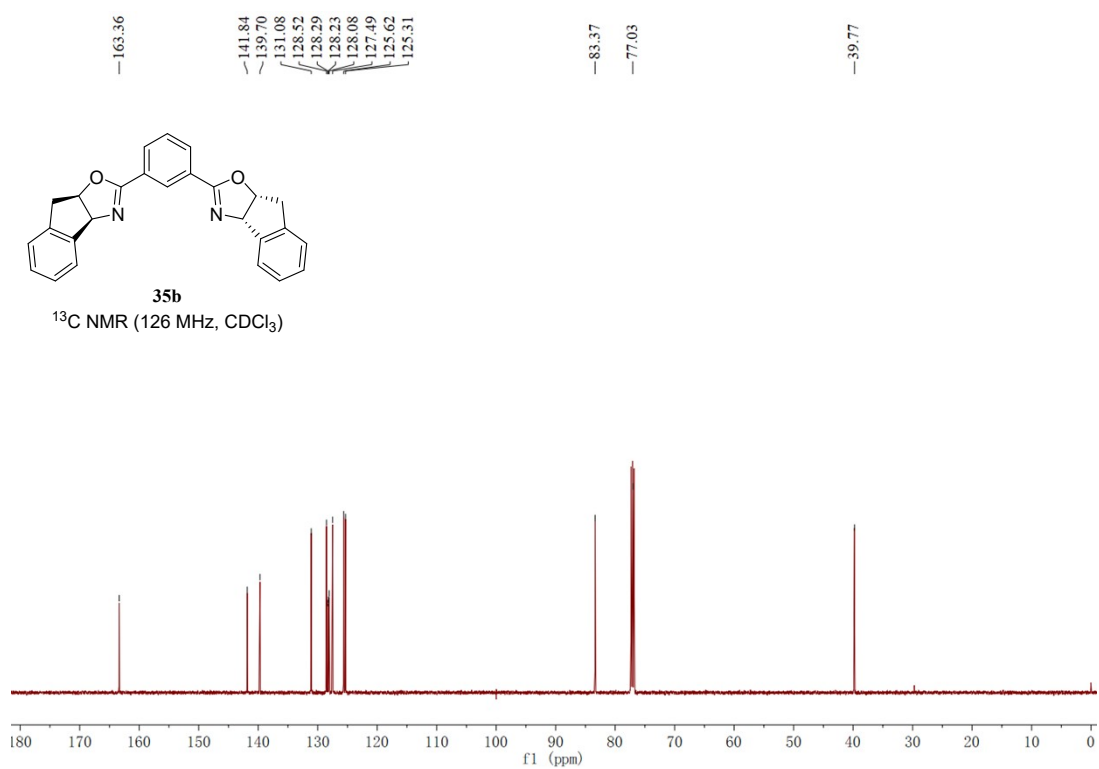



Temperature (°C)

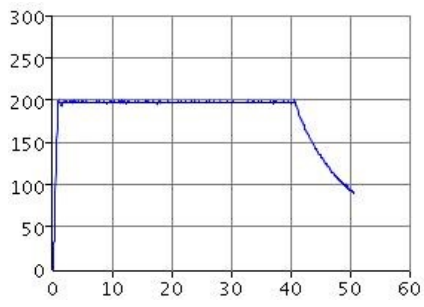

Pressure (bar)

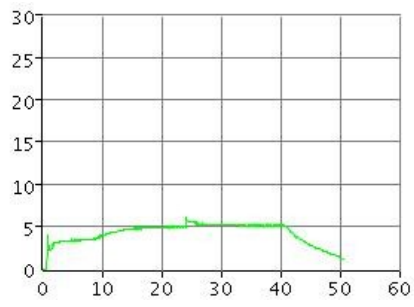

Power (W)

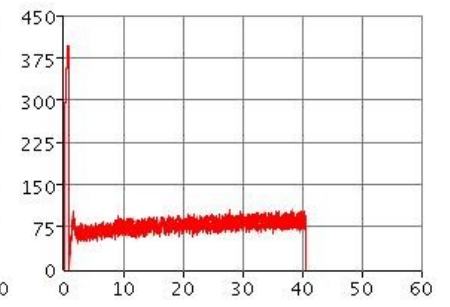

Time (min)

## NMR spectra and microwave data of compound 36

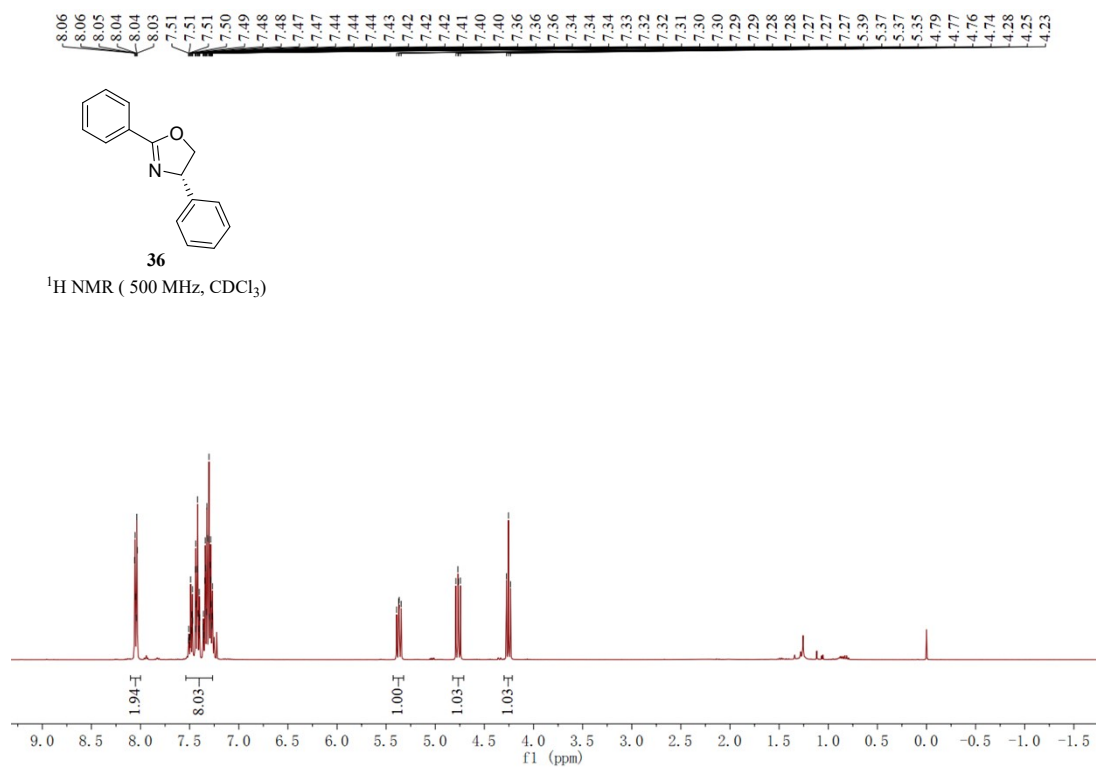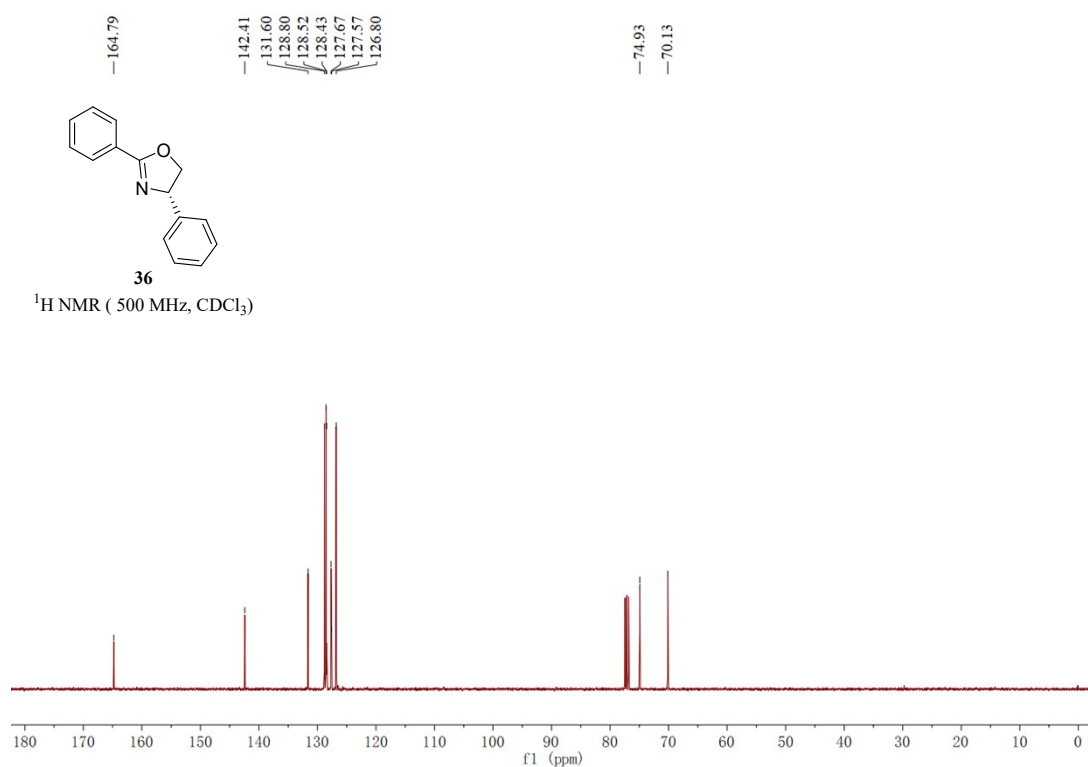

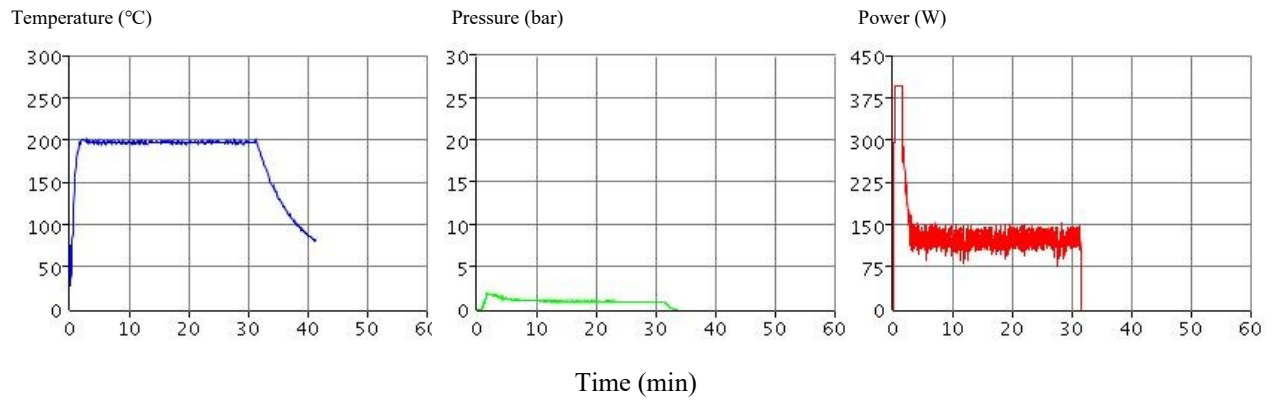

## NMR spectra and microwave data of compound 37

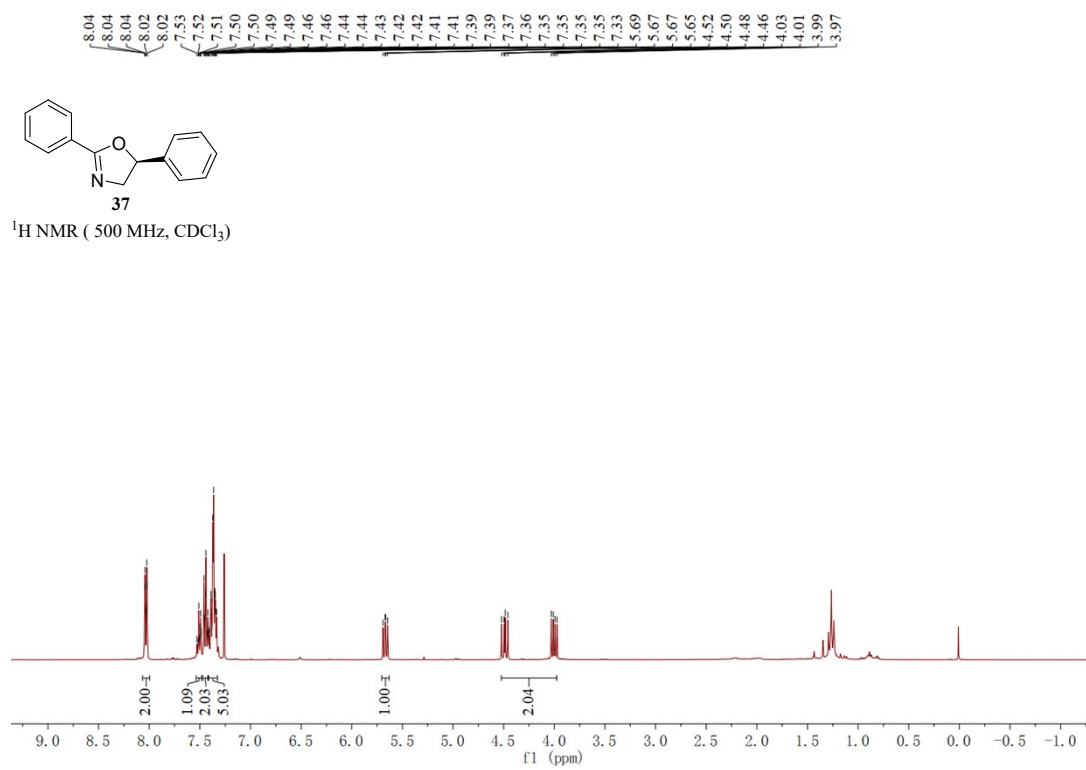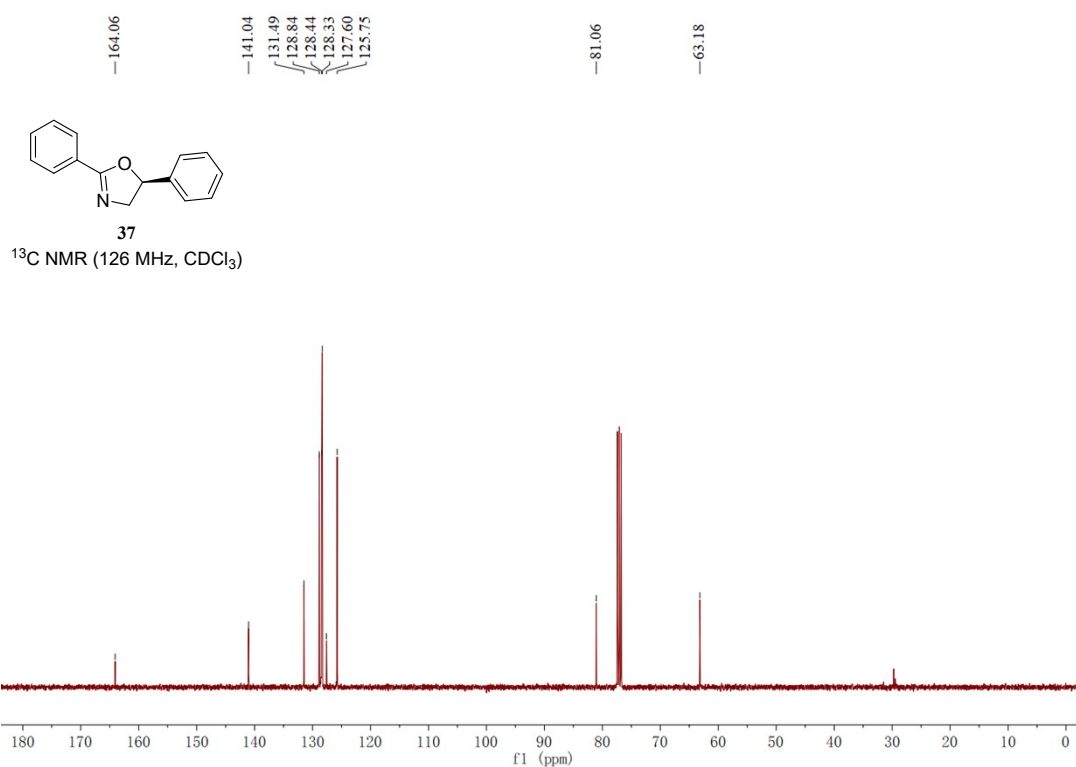

Temperature (°C)

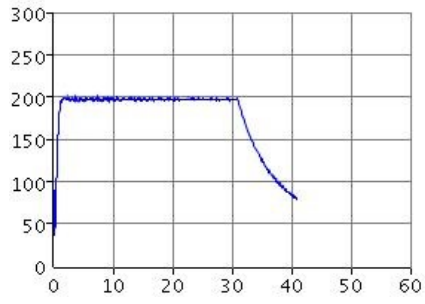

Pressure (bar)

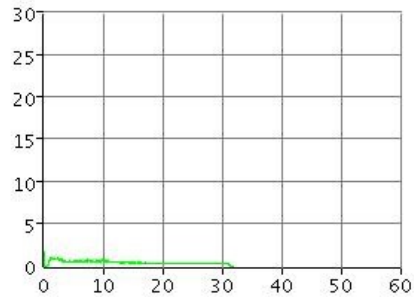

Power (W)

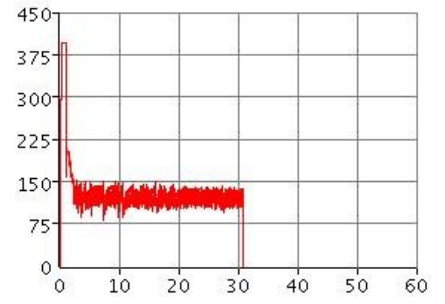

Time (min)

### NMR spectra and microwave data of compound 38

7.97  
7.96  
7.96  
7.95  
7.95  
7.94  
7.51  
7.49  
7.49  
7.48  
7.48  
7.47  
7.47  
7.47  
7.43  
7.43  
7.42  
7.42  
7.41  
7.41  
7.40  
7.39  
7.33  
7.32  
7.32  
7.31  
7.30  
7.30  
7.27  
7.27  
7.26  
7.25  
7.24  
2.76  
2.74  
2.73  
2.71

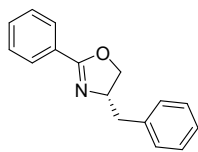

**38**

<sup>1</sup>H NMR (500 MHz, CDCl<sub>3</sub>)

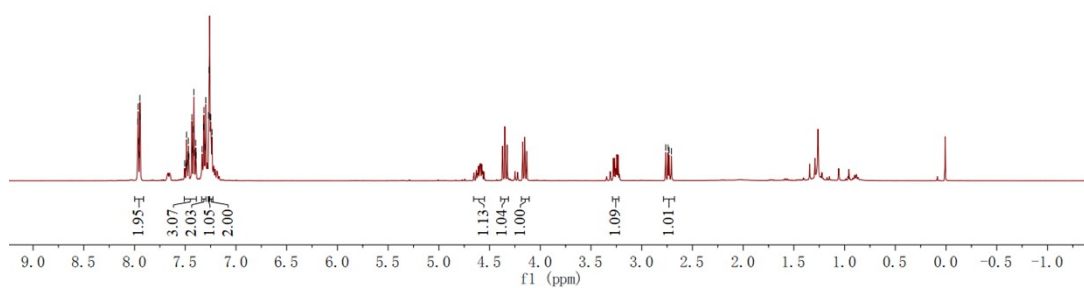

164.07

137.96  
131.40  
130.68  
129.29  
128.58  
128.53  
128.35  
128.32  
128.28  
128.20  
127.69  
126.54

71.88  
67.83

41.83

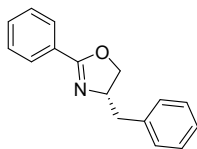

**38**

<sup>13</sup>C NMR (126 MHz, CDCl<sub>3</sub>)

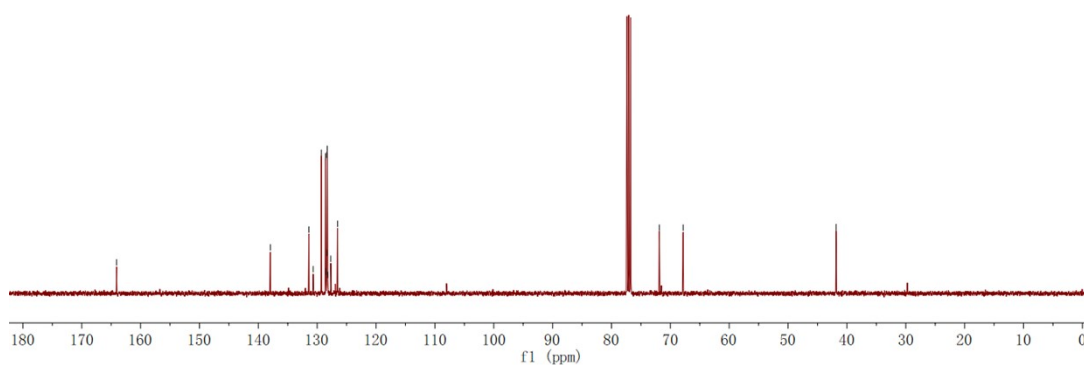

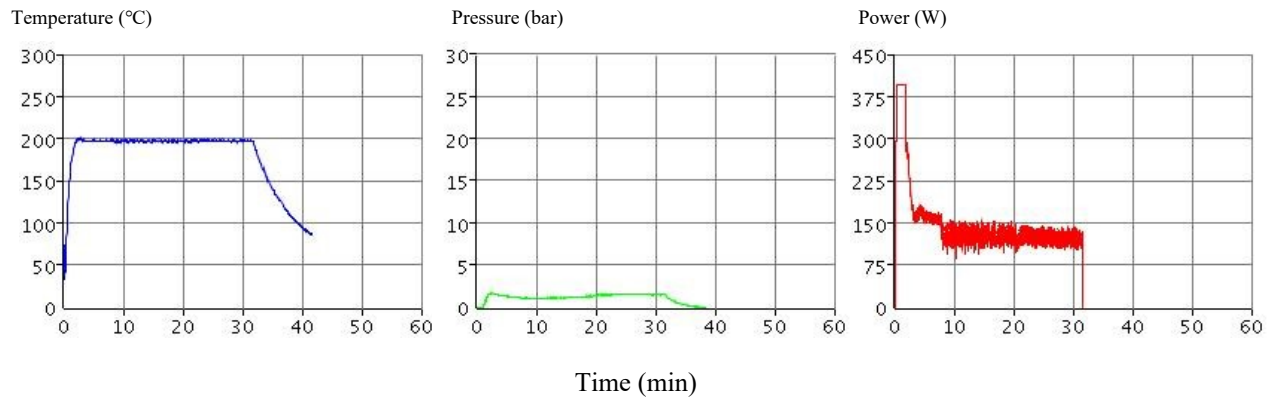

## NMR spectra and microwave data of compound 40

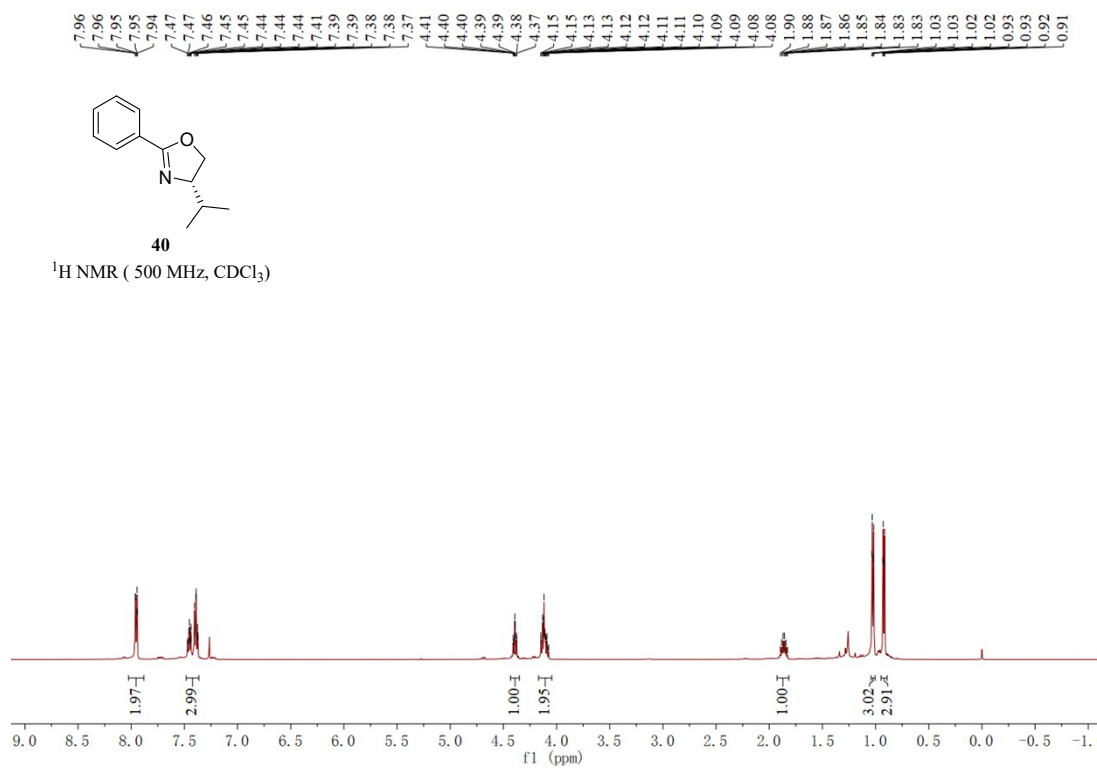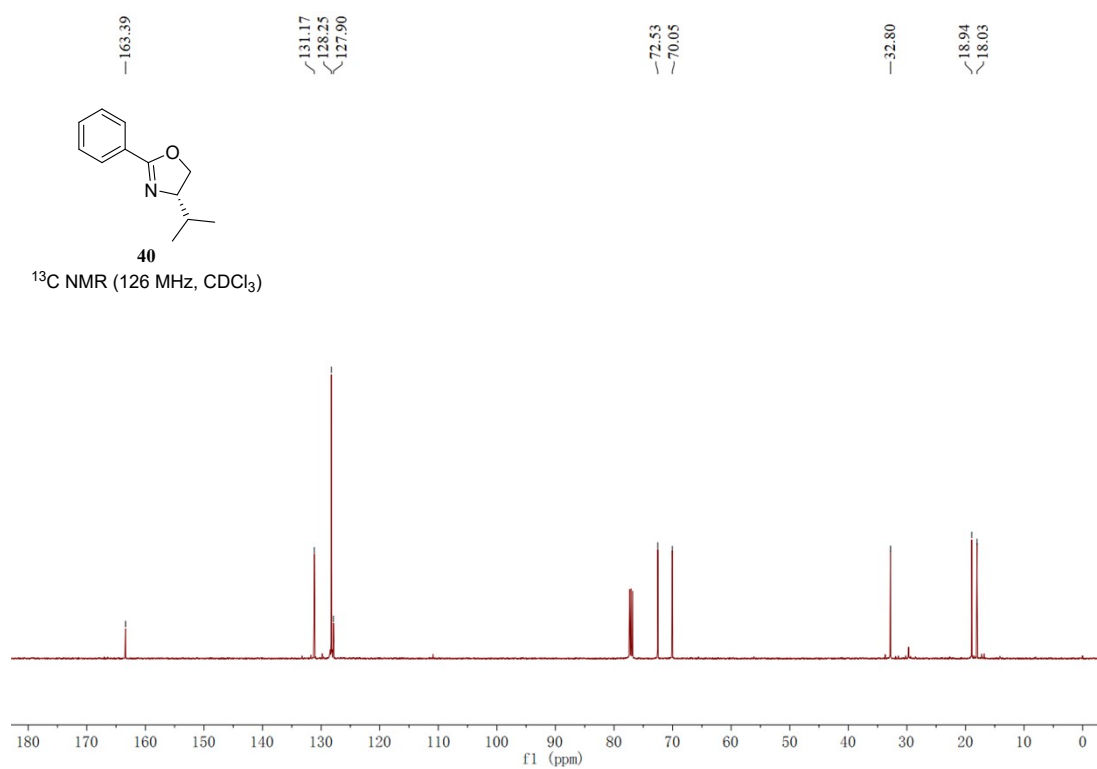



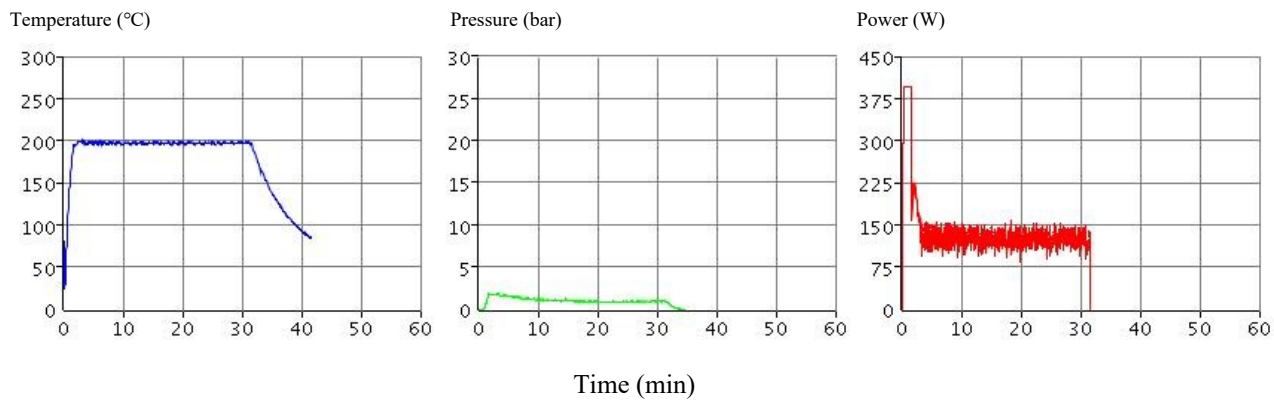

## NMR spectra and microwave data of compound 41

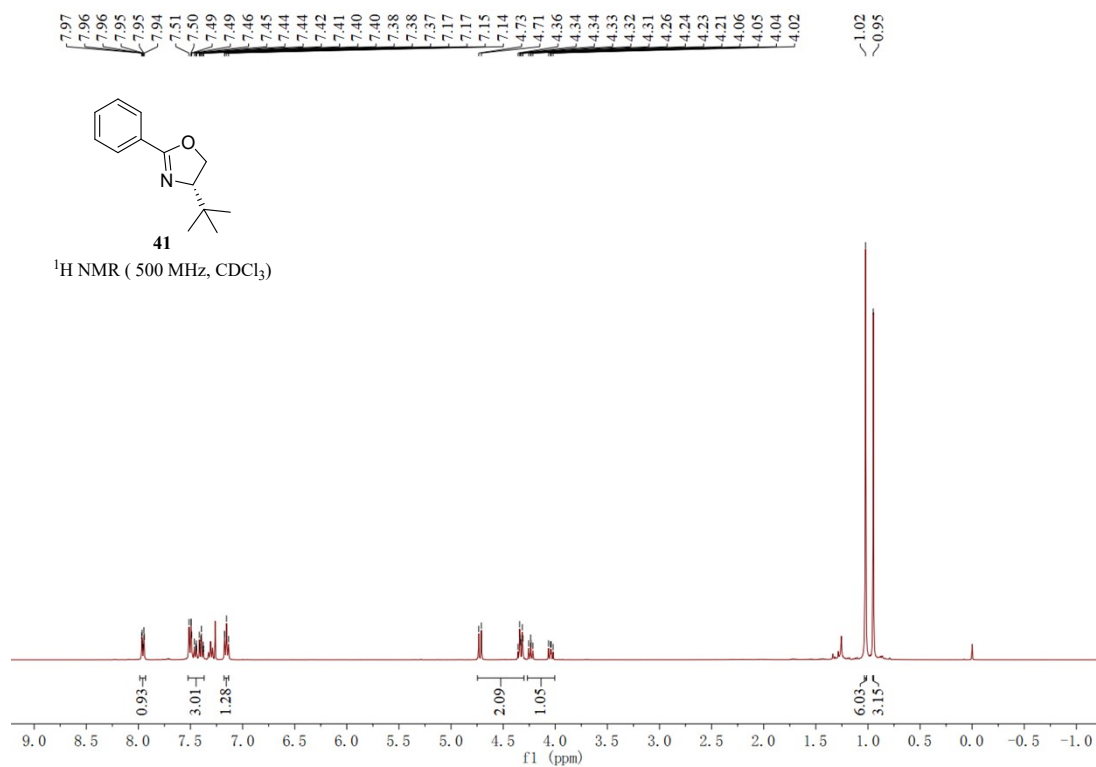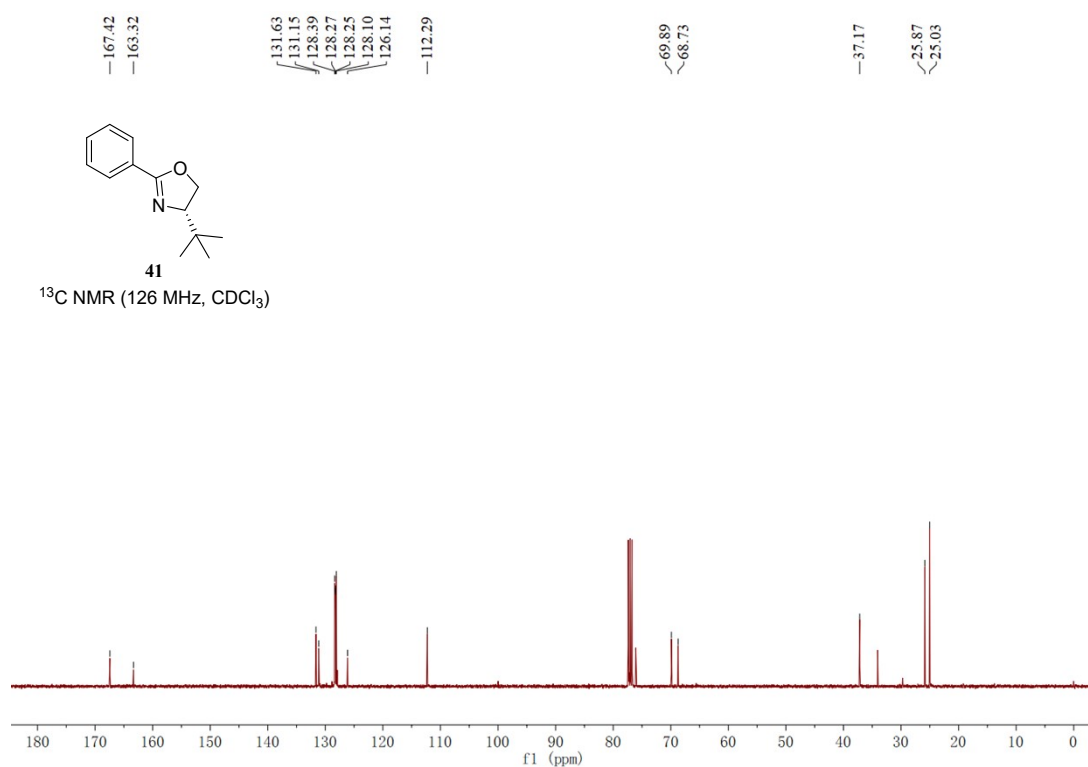

Temperature (°C)

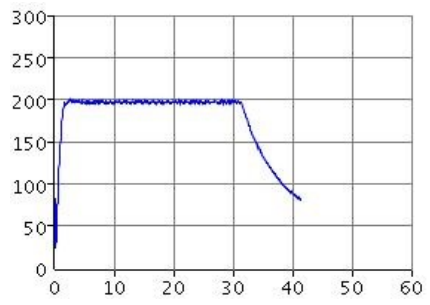

Pressure (bar)

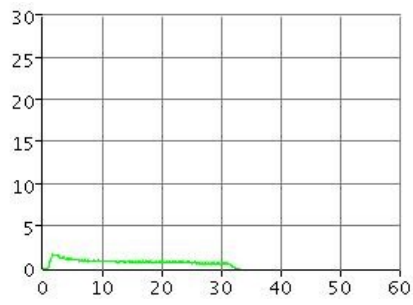

Power (W)

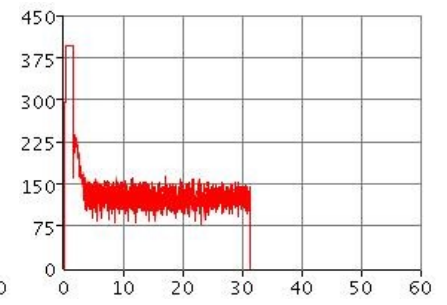

Time (min)

## NMR spectra and microwave data of compound 42

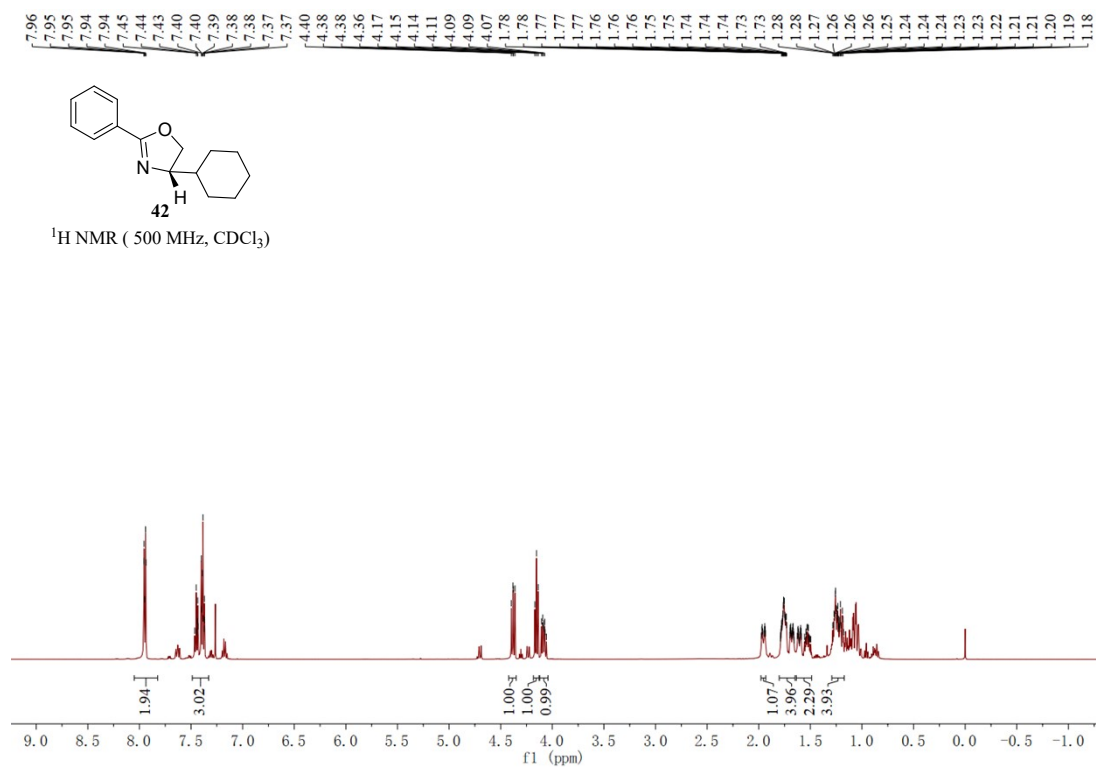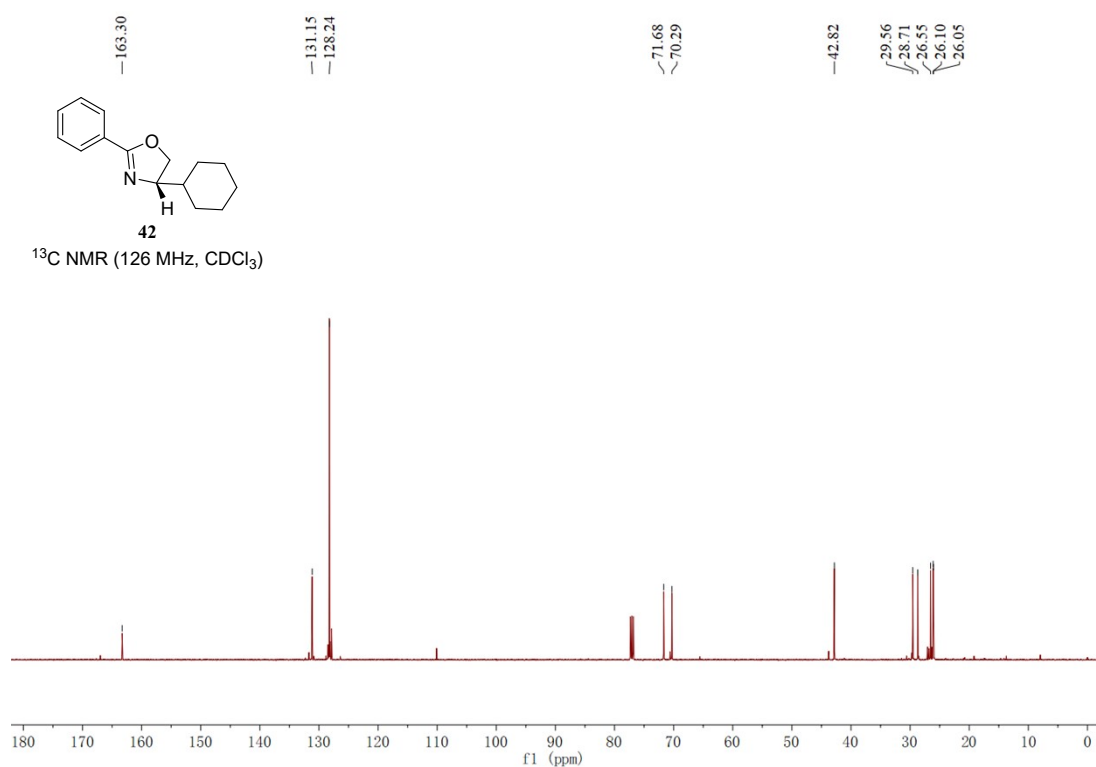

Temperature (°C)

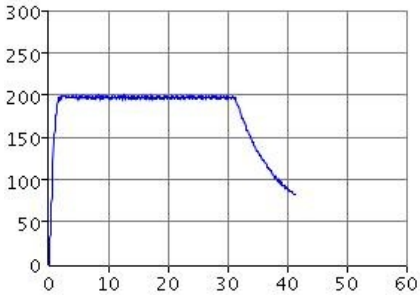

Pressure (bar)

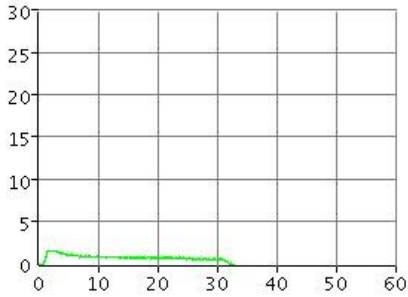

Power (W)

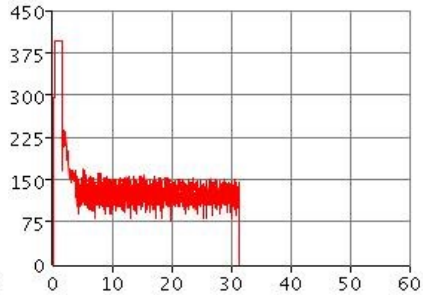

Time (min)

### NMR spectra and microwave data of compound 43

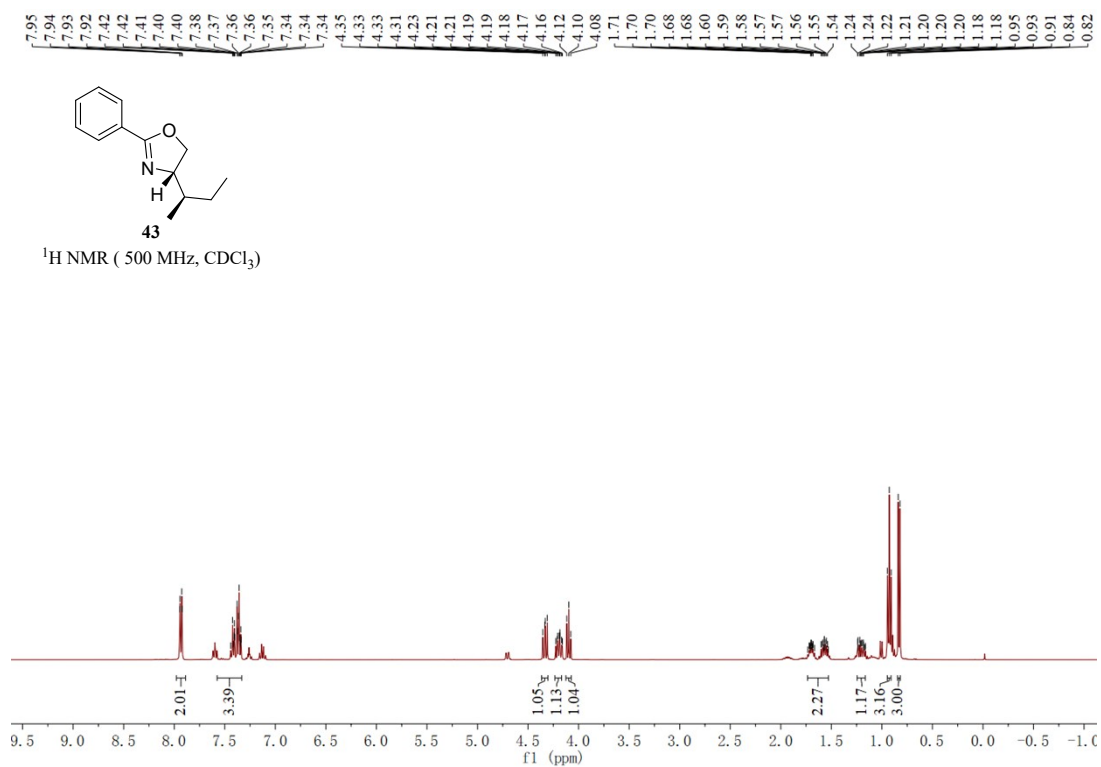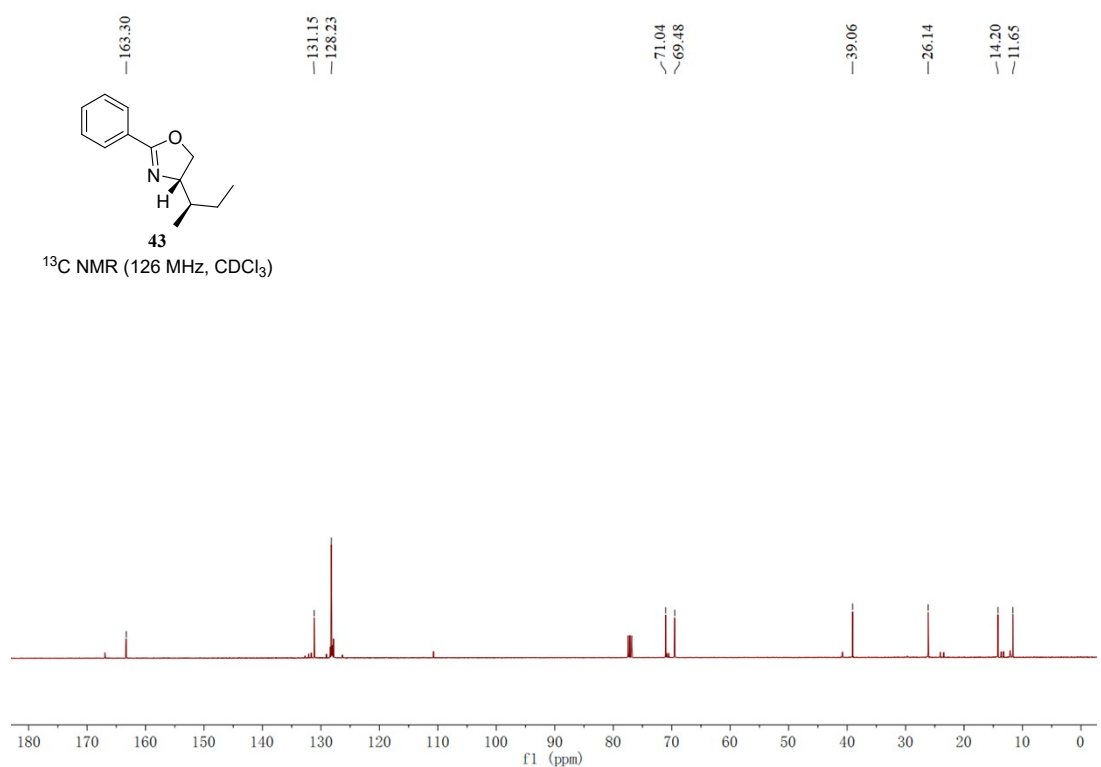

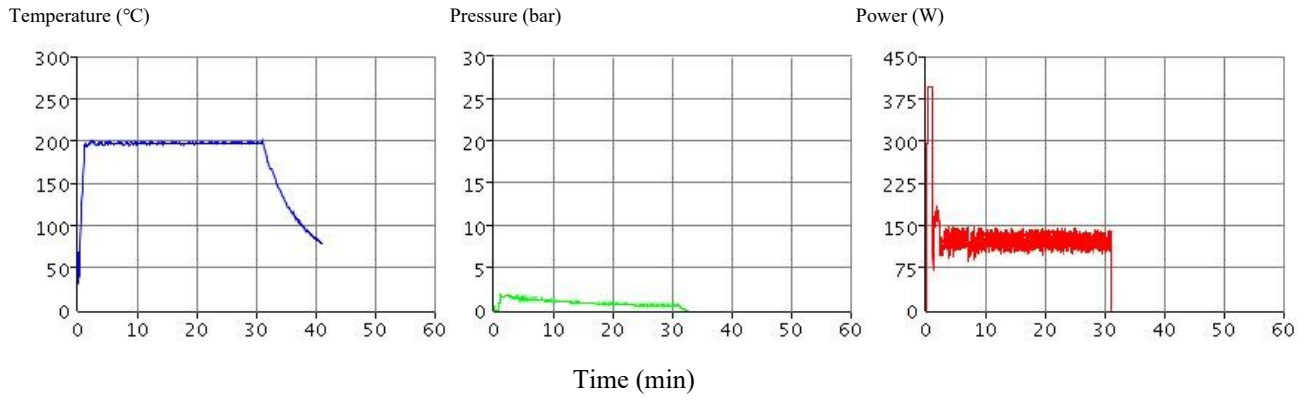

## NMR spectra and microwave data of compound 44

7.85  
7.85  
7.84  
7.84  
7.83  
7.83  
7.82  
7.48  
7.47  
7.47  
7.46  
7.46  
7.45  
7.44  
7.44  
7.43  
7.43  
7.42  
7.42  
7.41  
7.40  
7.40  
7.39  
7.39  
4.48  
4.45  
4.44  
4.43  
3.43  
3.41

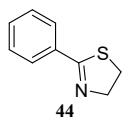

$^1\text{H}$  NMR (500 MHz,  $\text{CDCl}_3$ )

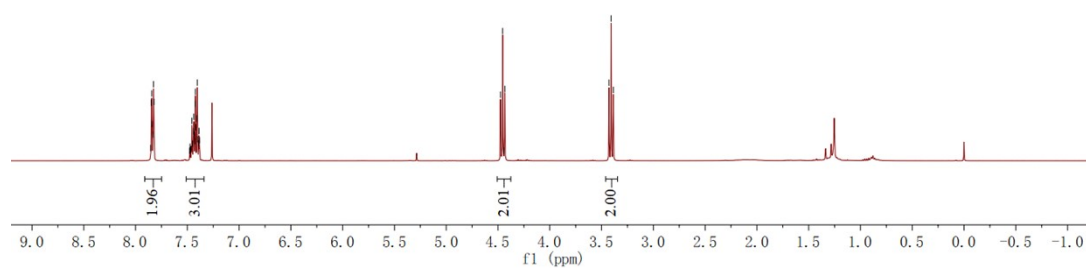

168.57  
133.20  
131.16  
128.50  
128.36  
65.19  
33.66

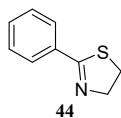

$^{13}\text{C}$  NMR (126 MHz,  $\text{CDCl}_3$ )

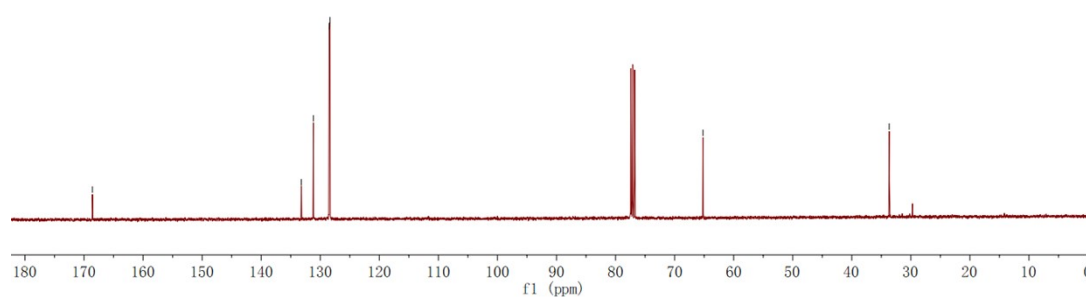



Temperature (°C)

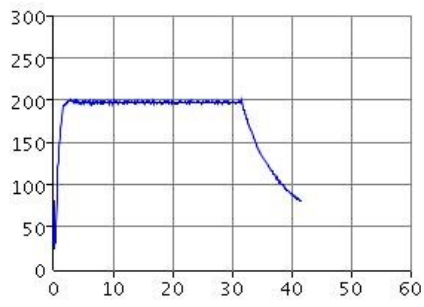

Pressure (bar)

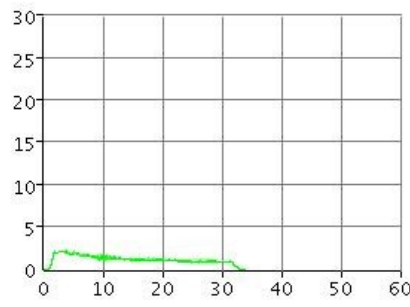

Power (W)

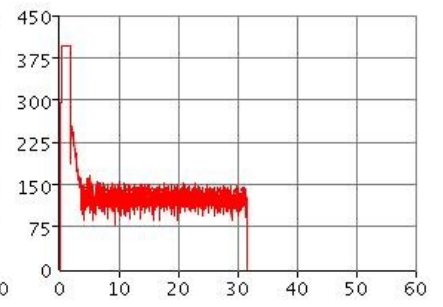

Time (min)

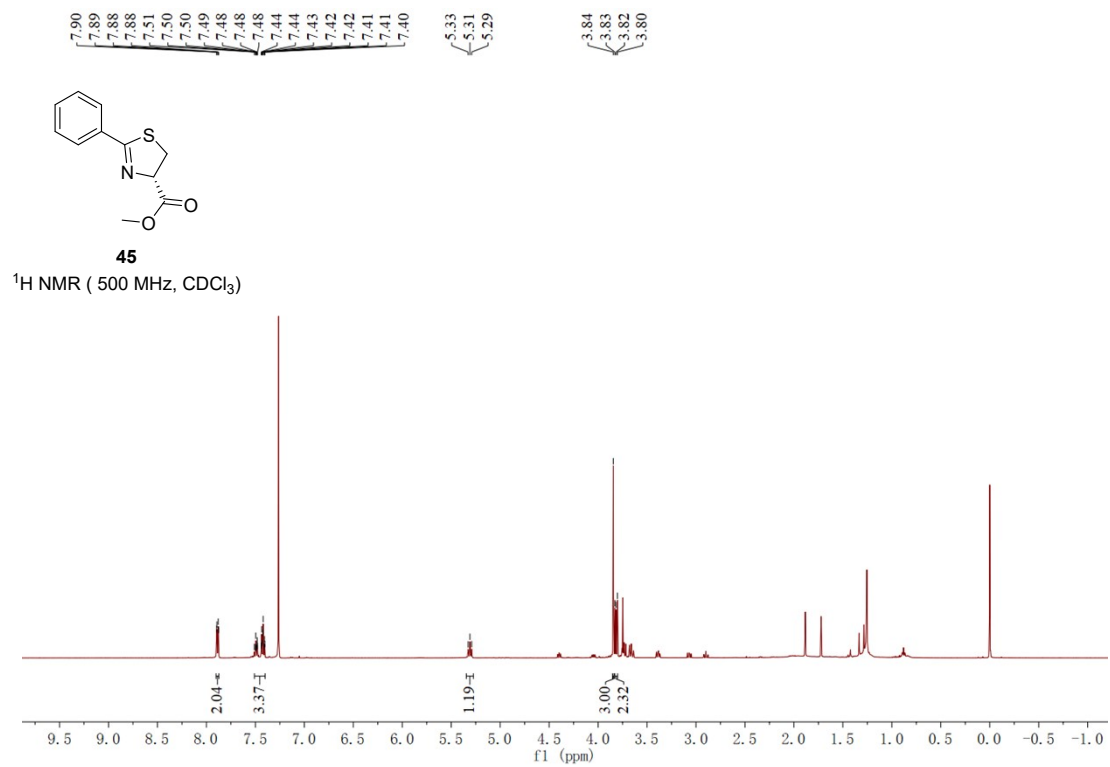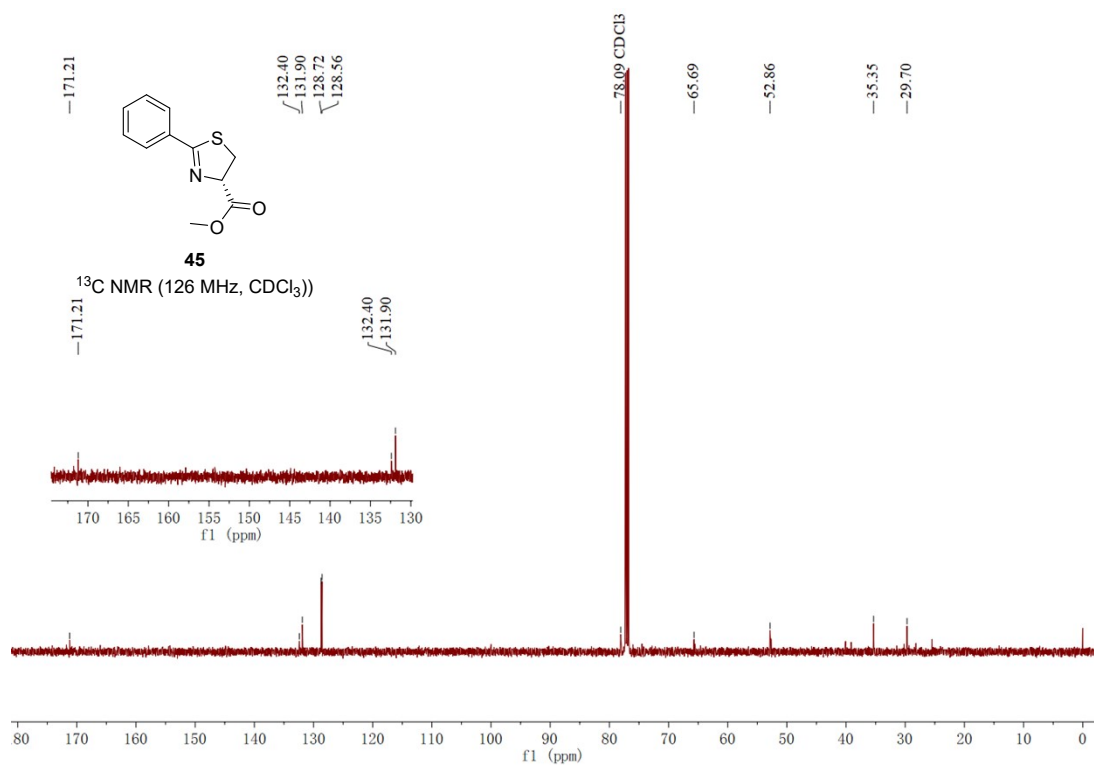

Temperature (°C)

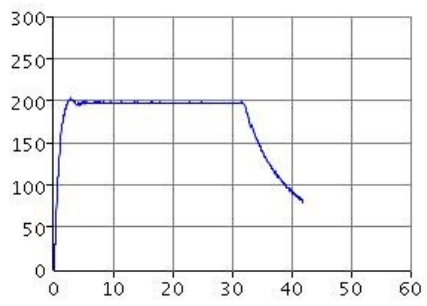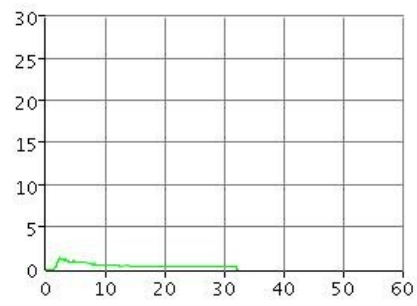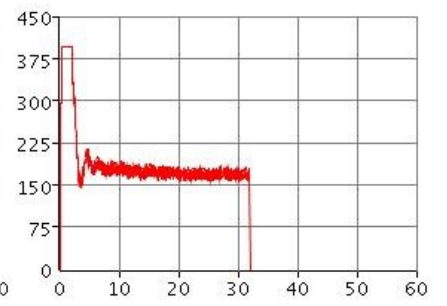

(min) Time (min)

## Spectroscopic Data (HPLC Trace)

Fig S1. (3a*S*,8a*R*)-2-phenyl-3a,8a-dihydro-8*H*-indeno[1,2-*d*]oxazole (3)

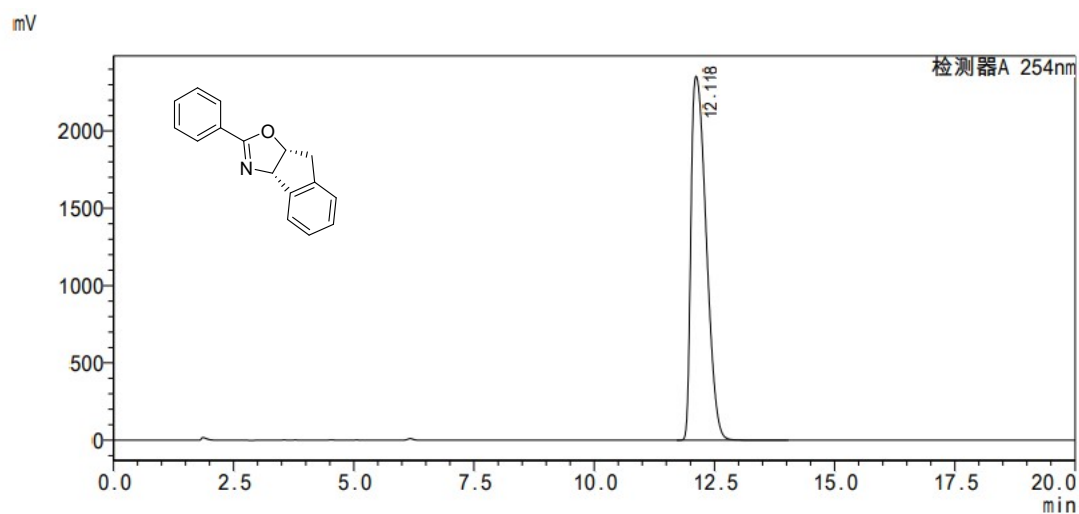

<峰表>

检测器A 254nm

| 峰号 | 保留时间   | 面积       | 高度      | 浓度      | 浓度单位 | 标记 | 化合物名 |
|----|--------|----------|---------|---------|------|----|------|
| 1  | 12.118 | 51729947 | 2354037 | 100.000 |      |    |      |
| 总计 |        | 51729947 | 2354037 |         |      |    |      |

Fig S2. (3a*R*,8a*S*)-2-phenyl-3a,8a-dihydro-8*H*-indeno[1,2-*d*]oxazole

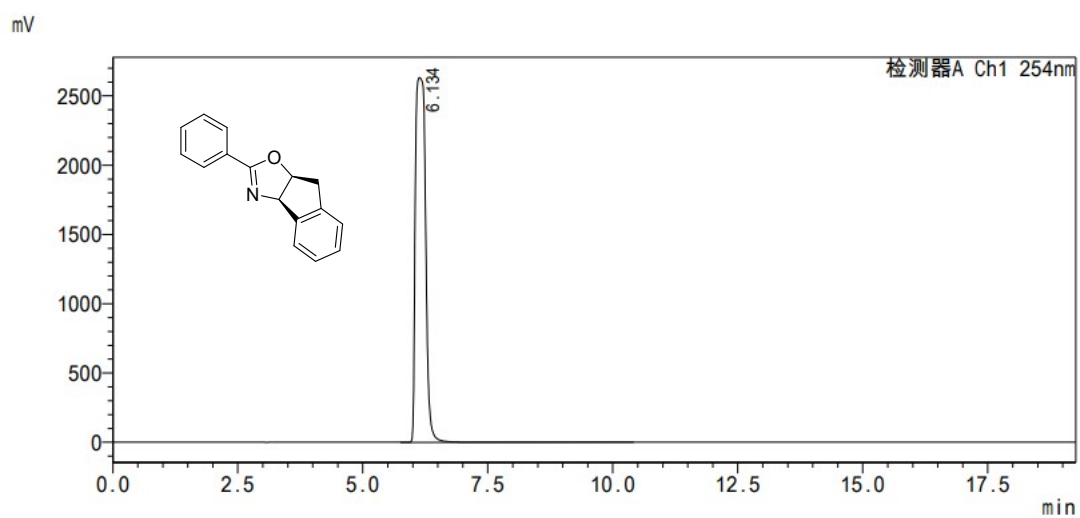

<峰表>

检测器A Ch1 254nm

| 峰号 | 保留时间  | 面积       | 高度      | 浓度      | 浓度单位 | 标记 | 化合物名 |
|----|-------|----------|---------|---------|------|----|------|
| 1  | 6.134 | 37429911 | 2631916 | 100.000 |      | S  |      |
| 总计 |       | 37429911 | 2631916 |         |      |    |      |

Fig S3. The racemate of compound 3

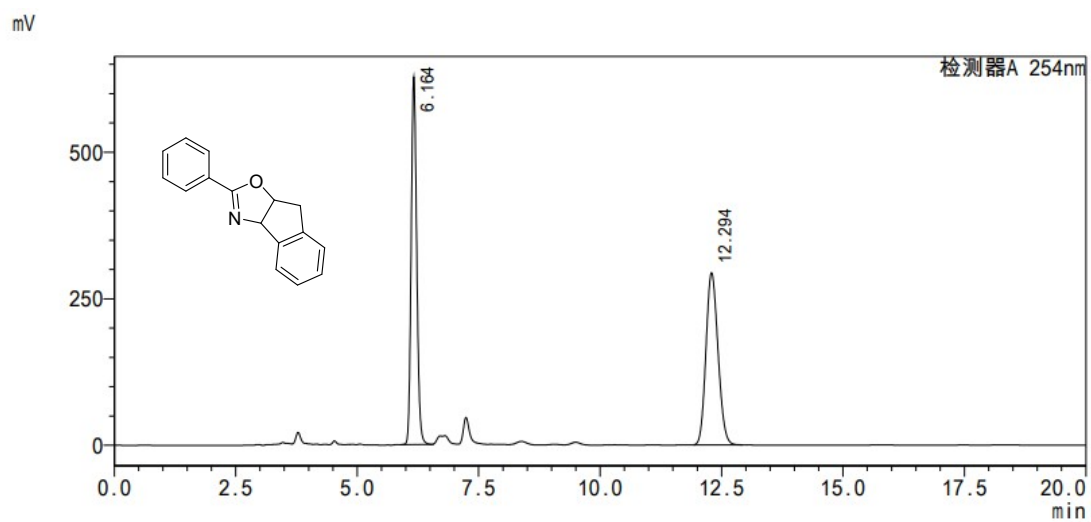

<峰表>

检测器A 254nm

| 峰号 | 保留时间   | 面积       | 高度     | 浓度     | 浓度单位 | 标记 | 化合物名 |
|----|--------|----------|--------|--------|------|----|------|
| 1  | 6.164  | 4966992  | 627066 | 49.517 |      | M  |      |
| 2  | 12.294 | 5063884  | 293785 | 50.483 |      | M  |      |
| 总计 |        | 10030876 | 920851 |        |      |    |      |

## X-ray crystalline structure of compound 13:

Table S1. Crystalline data and structure refinement for compound 13

|                                             |                                                               |
|---------------------------------------------|---------------------------------------------------------------|
| Identification code                         | mo220823a_pl                                                  |
| Empirical formula                           | C <sub>16</sub> H <sub>12</sub> INO                           |
| Formula weight                              | 361.17                                                        |
| Temperature/K                               | 296.15                                                        |
| Crystal system                              | orthorhombic                                                  |
| Space group                                 | P2 <sub>1</sub> 2 <sub>1</sub> 2 <sub>1</sub>                 |
| a/Å                                         | 4.896(5)                                                      |
| b/Å                                         | 10.615(12)                                                    |
| c/Å                                         | 26.62(3)                                                      |
| α/°                                         | 90                                                            |
| β/°                                         | 90                                                            |
| γ/°                                         | 90                                                            |
| Volume/Å <sup>3</sup>                       | 1383(3)                                                       |
| Z                                           | 4                                                             |
| ρ <sub>calc</sub> /cm <sup>3</sup>          | 1.734                                                         |
| μ/mm <sup>-1</sup>                          | 2.305                                                         |
| F(000)                                      | 704.0                                                         |
| Crystal size/mm <sup>3</sup>                | 0.25 × 0.25 × 0.1                                             |
| Radiation                                   | MoKα (λ = 0.71073)                                            |
| 2θ range for data collection/°              | 3.06 to 57.014                                                |
| Index ranges                                | -6 ≤ h ≤ 6, -14 ≤ k ≤ 13, -32 ≤ l ≤ 35                        |
| Reflections collected                       | 9381                                                          |
| Independent reflections                     | 3461 [R <sub>int</sub> = 0.0370, R <sub>sigma</sub> = 0.0505] |
| Data/restraints/parameters                  | 3461/0/181                                                    |
| Goodness-of-fit on F <sup>2</sup>           | 0.997                                                         |
| Final R indexes [I >= 2σ (I)]               | R <sub>1</sub> = 0.0346, wR <sub>2</sub> = 0.0581             |
| Final R indexes [all data]                  | R <sub>1</sub> = 0.0765, wR <sub>2</sub> = 0.0695             |
| Largest diff. peak/hole / e Å <sup>-3</sup> | 0.33/-0.55                                                    |
| Flack parameter                             | 0.04(3)                                                       |

**Table S2. Fractional Atomic Coordinates ( $\times 10^4$ ) and Equivalent Isotropic Displacement Parameters ( $\text{\AA}^2 \times 10^3$ ) for compound 13.  $U_{eq}$  is defined as 1/3 of the trace of the orthogonalised  $U_{ij}$  tensor.**

| Atom  | <i>x</i>   | <i>y</i>  | <i>z</i>    | $U_{eq}$ |
|-------|------------|-----------|-------------|----------|
| I(1)  | 5287.1(10) | 2805.9(4) | 2440.9(2)   | 93.0(2)  |
| O(1)  | 2112(7)    | 4271(3)   | 539.8(12)   | 51.2(9)  |
| N(1)  | 3961(9)    | 6145(3)   | 337.9(14)   | 46.7(12) |
| C(3)  | 3803(10)   | 5406(4)   | -538.7(17)  | 39.8(12) |
| C(2)  | 2182(11)   | 5812(5)   | -87.6(17)   | 45.4(13) |
| C(1)  | 3781(10)   | 5254(4)   | 647.5(17)   | 41.2(12) |
| C(11) | 5279(11)   | 5163(4)   | 1123.4(15)  | 41.7(12) |
| C(9)  | 1030(12)   | 3631(5)   | -327(2)     | 50.1(15) |
| C(8)  | 3117(10)   | 4177(4)   | -673.3(17)  | 40.6(11) |
| C(10) | 688(10)    | 4614(4)   | 79.0(16)    | 47.6(12) |
| C(15) | 6218(11)   | 4202(5)   | 1912.2(18)  | 51.7(14) |
| C(16) | 4752(11)   | 4220(4)   | 1466.3(15)  | 46.3(11) |
| C(4)  | 5736(11)   | 6068(4)   | -806.2(17)  | 52.2(14) |
| C(12) | 7233(11)   | 6063(5)   | 1229.6(19)  | 54.4(14) |
| C(14) | 8178(12)   | 5088(5)   | 2013(2)     | 58.8(16) |
| C(13) | 8675(12)   | 6015(5)   | 1671(2)     | 66.1(17) |
| C(7)  | 4323(12)   | 3647(5)   | -1090.9(18) | 58.4(15) |
| C(6)  | 6188(13)   | 4330(6)   | -1360(2)    | 69.6(18) |
| C(5)  | 6919(13)   | 5522(6)   | -1220(2)    | 69.0(17) |

**Table S3. Anisotropic Displacement Parameters ( $\text{\AA}^2 \times 10^3$ ) for compound 13. The Anisotropic displacement factor exponent takes the form:  $-2\pi^2[h^2a^2U_{11}+2hka^*b^*U_{12}+\dots]$ .**

| Atom  | $U_{11}$ | $U_{22}$ | $U_{33}$ | $U_{23}$  | $U_{13}$ | $U_{12}$  |
|-------|----------|----------|----------|-----------|----------|-----------|
| I(1)  | 129.6(4) | 97.6(3)  | 51.8(2)  | 22.49(18) | -30.8(3) | -28.9(3)  |
| O(1)  | 49(2)    | 58(2)    | 47(2)    | 13.5(16)  | -7.8(18) | -11.0(19) |
| N(1)  | 65(3)    | 33(2)    | 42(2)    | -2.3(16)  | 2(2)     | 7(2)      |
| C(3)  | 40(3)    | 38(3)    | 42(2)    | 7(2)      | -7(2)    | 7(3)      |
| C(2)  | 53(4)    | 40(3)    | 42(3)    | 1(2)      | -7(3)    | 15(3)     |
| C(1)  | 39(3)    | 42(3)    | 43(3)    | -10(2)    | 6(2)     | 2(2)      |
| C(11) | 47(3)    | 39(2)    | 39(2)    | -8.9(17)  | 5(3)     | 1(3)      |
| C(9)  | 46(4)    | 53(4)    | 51(3)    | 8(3)      | -13(3)   | -1(3)     |
| C(8)  | 39(3)    | 43(3)    | 40(3)    | 1(2)      | -10(2)   | 2(2)      |
| C(10) | 30(3)    | 63(3)    | 50(3)    | 7(2)      | 4(2)     | 3(3)      |
| C(15) | 62(4)    | 54(3)    | 39(3)    | 1(2)      | -1(2)    | -2(3)     |
| C(16) | 50(3)    | 48(3)    | 41(2)    | -1.7(18)  | -3(3)    | -6(3)     |
| C(4)  | 65(4)    | 46(3)    | 45(3)    | 12(2)     | -10(3)   | -1(3)     |
| C(12) | 61(4)    | 51(3)    | 51(3)    | -4(2)     | 3(3)     | -13(3)    |
| C(14) | 57(4)    | 73(4)    | 47(3)    | -17(3)    | -6(3)    | -1(3)     |
| C(13) | 67(4)    | 70(4)    | 62(4)    | -24(3)    | 4(3)     | -20(3)    |
| C(7)  | 66(4)    | 57(3)    | 52(3)    | -12(2)    | -12(3)   | 6(3)      |
| C(6)  | 68(4)    | 99(5)    | 42(3)    | -6(3)     | 3(3)     | 19(4)     |
| C(5)  | 66(4)    | 89(5)    | 51(3)    | 22(3)     | 6(3)     | -1(4)     |

**Table S4 Bond Lengths for compound 13.**

| Atom  | Atom  | Length/ $\text{\AA}$ | Atom  | Atom  | Length/ $\text{\AA}$ |
|-------|-------|----------------------|-------|-------|----------------------|
| I(1)  | C(15) | 2.094(5)             | C(11) | C(12) | 1.382(7)             |
| O(1)  | C(1)  | 1.356(5)             | C(9)  | C(8)  | 1.494(7)             |
| O(1)  | C(10) | 1.457(6)             | C(9)  | C(10) | 1.511(7)             |
| N(1)  | C(2)  | 1.472(6)             | C(8)  | C(7)  | 1.379(6)             |
| N(1)  | C(1)  | 1.257(6)             | C(15) | C(16) | 1.387(6)             |
| C(3)  | C(2)  | 1.502(7)             | C(15) | C(14) | 1.370(7)             |
| C(3)  | C(8)  | 1.394(6)             | C(4)  | C(5)  | 1.373(7)             |
| C(3)  | C(4)  | 1.378(7)             | C(12) | C(13) | 1.371(7)             |
| C(2)  | C(10) | 1.532(7)             | C(14) | C(13) | 1.363(8)             |
| C(1)  | C(11) | 1.467(6)             | C(7)  | C(6)  | 1.369(8)             |
| C(11) | C(16) | 1.379(6)             | C(6)  | C(5)  | 1.367(8)             |



**Table S5 Bond Angles for compound 13.**

| <b>Atom</b> | <b>Atom</b> | <b>Atom</b> | <b>Angle/°</b> | <b>Atom</b> | <b>Atom</b> | <b>Atom</b> | <b>Angle/°</b> |
|-------------|-------------|-------------|----------------|-------------|-------------|-------------|----------------|
| C(1)        | O(1)        | C(10)       | 105.9(3)       | C(7)        | C(8)        | C(3)        | 119.1(5)       |
| C(1)        | N(1)        | C(2)        | 106.4(4)       | C(7)        | C(8)        | C(9)        | 129.2(5)       |
| C(8)        | C(3)        | C(2)        | 110.3(4)       | O(1)        | C(10)       | C(2)        | 102.9(4)       |
| C(4)        | C(3)        | C(2)        | 129.0(5)       | O(1)        | C(10)       | C(9)        | 112.1(4)       |
| C(4)        | C(3)        | C(8)        | 120.7(5)       | C(9)        | C(10)       | C(2)        | 108.3(4)       |
| N(1)        | C(2)        | C(3)        | 111.8(5)       | C(16)       | C(15)       | I(1)        | 118.2(4)       |
| N(1)        | C(2)        | C(10)       | 105.0(4)       | C(14)       | C(15)       | I(1)        | 120.4(4)       |
| C(3)        | C(2)        | C(10)       | 104.2(4)       | C(14)       | C(15)       | C(16)       | 121.4(5)       |
| O(1)        | C(1)        | C(11)       | 115.6(4)       | C(11)       | C(16)       | C(15)       | 118.7(5)       |
| N(1)        | C(1)        | O(1)        | 118.8(4)       | C(5)        | C(4)        | C(3)        | 119.3(5)       |
| N(1)        | C(1)        | C(11)       | 125.5(5)       | C(13)       | C(12)       | C(11)       | 120.4(5)       |
| C(16)       | C(11)       | C(1)        | 121.8(5)       | C(13)       | C(14)       | C(15)       | 119.3(5)       |
| C(16)       | C(11)       | C(12)       | 119.8(4)       | C(14)       | C(13)       | C(12)       | 120.5(5)       |
| C(12)       | C(11)       | C(1)        | 118.5(4)       | C(6)        | C(7)        | C(8)        | 119.5(5)       |
| C(8)        | C(9)        | C(10)       | 104.4(4)       | C(5)        | C(6)        | C(7)        | 121.4(6)       |
| C(3)        | C(8)        | C(9)        | 111.7(4)       | C(6)        | C(5)        | C(4)        | 120.0(6)       |

**Table S6 Torsion Angles for compound 13.**

| A    | B     | C     | D     | Angle/°   | A     | B     | C     | D     | Angle/°   |
|------|-------|-------|-------|-----------|-------|-------|-------|-------|-----------|
| I(1) | C(15) | C(16) | C(11) | 177.7(4)  | C(11) | C(12) | C(13) | C(14) | -0.8(9)   |
| I(1) | C(15) | C(14) | C(13) | -177.6(4) | C(9)  | C(8)  | C(7)  | C(6)  | 179.3(5)  |
| O(1) | C(1)  | C(11) | C(16) | -8.0(7)   | C(8)  | C(3)  | C(2)  | N(1)  | 120.1(4)  |
| O(1) | C(1)  | C(11) | C(12) | 173.0(4)  | C(8)  | C(3)  | C(2)  | C(10) | 7.2(5)    |
| N(1) | C(2)  | C(10) | O(1)  | -9.6(5)   | C(8)  | C(3)  | C(4)  | C(5)  | 2.3(7)    |
| N(1) | C(2)  | C(10) | C(9)  | -128.3(5) | C(8)  | C(9)  | C(10) | O(1)  | -102.7(4) |
| N(1) | C(1)  | C(11) | C(16) | 173.0(5)  | C(8)  | C(9)  | C(10) | C(2)  | 10.1(5)   |
| N(1) | C(1)  | C(11) | C(12) | -5.9(7)   | C(8)  | C(7)  | C(6)  | C(5)  | 1.1(8)    |
| C(3) | C(2)  | C(10) | O(1)  | 108.1(4)  | C(10) | O(1)  | C(1)  | N(1)  | -5.7(6)   |
| C(3) | C(2)  | C(10) | C(9)  | -10.7(5)  | C(10) | O(1)  | C(1)  | C(11) | 175.3(4)  |
| C(3) | C(8)  | C(7)  | C(6)  | 0.8(7)    | C(10) | C(9)  | C(8)  | C(3)  | -5.8(6)   |
| C(3) | C(4)  | C(5)  | C(6)  | -0.4(8)   | C(10) | C(9)  | C(8)  | C(7)  | 175.6(5)  |
| C(2) | N(1)  | C(1)  | O(1)  | -0.9(6)   | C(15) | C(14) | C(13) | C(12) | 0.0(9)    |
| C(2) | N(1)  | C(1)  | C(11) | 178.0(5)  | C(16) | C(11) | C(12) | C(13) | 0.9(8)    |
| C(2) | C(3)  | C(8)  | C(9)  | -1.0(6)   | C(16) | C(15) | C(14) | C(13) | 0.8(8)    |
| C(2) | C(3)  | C(8)  | C(7)  | 177.8(4)  | C(4)  | C(3)  | C(2)  | N(1)  | -59.6(6)  |
| C(2) | C(3)  | C(4)  | C(5)  | -178.0(5) | C(4)  | C(3)  | C(2)  | C(10) | -172.5(5) |
| C(1) | O(1)  | C(10) | C(2)  | 9.1(5)    | C(4)  | C(3)  | C(8)  | C(9)  | 178.7(4)  |
| C(1) | O(1)  | C(10) | C(9)  | 125.2(4)  | C(4)  | C(3)  | C(8)  | C(7)  | -2.5(7)   |
| C(1) | N(1)  | C(2)  | C(3)  | -105.6(5) | C(12) | C(11) | C(16) | C(15) | -0.1(7)   |
| C(1) | N(1)  | C(2)  | C(10) | 6.7(5)    | C(14) | C(15) | C(16) | C(11) | -0.7(8)   |
| C(1) | C(11) | C(16) | C(15) | -179.0(5) | C(7)  | C(6)  | C(5)  | C(4)  | -1.3(9)   |
| C(1) | C(11) | C(12) | C(13) | 179.8(5)  |       |       |       |       |           |

**Table S7 Hydrogen Atom Coordinates ( $\text{\AA}\times 10^4$ ) and Isotropic Displacement Parameters ( $\text{\AA}^2\times 10^3$ ) for compound 13.**

| <b>Atom</b> | <b><i>x</i></b> | <b><i>y</i></b> | <b><i>z</i></b> | <b>U(eq)</b> |
|-------------|-----------------|-----------------|-----------------|--------------|
| H(2)        | 904.88          | 6492.84         | -169.33         | 54           |
| H(10)       | -1247.25        | 4784.06         | 143.9           | 57           |
| H(16)       | 3439.99         | 3608.61         | 1400            | 56           |
| H(4)        | 6234.56         | 6876.77         | -707.56         | 63           |
| H(12)       | 7571.93         | 6706.15         | 1000.55         | 65           |
| H(14)       | 9159.22         | 5057.3          | 2311.94         | 71           |
| H(13)       | 10003.19        | 6618.86         | 1736.9          | 79           |
| H(7)        | 3872.35         | 2832.2          | -1188.75        | 70           |
| H(6)        | 6975.29         | 3975.39         | -1645.2         | 83           |
| H(5)        | 8217.52         | 5962.93         | -1404.71        | 83           |
| H(9A)       | -750(110)       | 3570(50)        | -514(18)        | 63(16)       |
| H(9B)       | 1580(110)       | 2850(50)        | -199(18)        | 69(16)       |

### **III. References**

1. S. Roshandel, S. C. Suri, J. C. Marcischak, G. Rasul and G. K. Surya Prakash, *Green Chem.*, 2018, **20**, 3700-3704.
